# Supplementary material for: A Data Set and Deep Learning Algorithm for the Detection of Masses and Architectural Distortions in Digital Breast Tomosynthesis Images
Source: PubMed Central journal article supplement (PMC8369362; doi:10.1001/jamanetworkopen.2021.19100), 2021-08-16
Supplement: jamanetwopen-e2119100-s001.pdf [file jamanetwopen-e2119100-s001.pdf]

## Supplemental Online Content

Buda M, Saha A, Walsh R, et al. A data set and deep learning algorithm for the detection of masses and architectural distortions in digital breast tomosynthesis images. *JAMA Netw Open*. 2021;4(8):e2119100. doi:10.1001/jamanetworkopen.2021.19100

**eAppendix 1.** Supplemental Methods

**eReferences.**

**eAppendix 2.** Results From All Model Runs

This supplemental material has been provided by the authors to give readers additional information about their work.

## eAppendix 1. Supplemental Methods

### 1 Tested loss functions

To provide an insight into the effects of different hyper-parameters on the performance, we performed a grid search over different network sizes and objectness loss functions that address the problem of class imbalance [1]. Our problem is characterized by a significant imbalance between the bounding boxes corresponding to lesions and background class that the network learns to distinguish in the training process. The 4 tested loss functions for addressing this problem were: (i) binary cross-entropy, (ii) weighted binary cross-entropy, (iii) focal loss [2], and (iv) reduced focal loss [3]. The 4 tested loss functions are shown in Figure 1. and formulations are provided in Table 1.

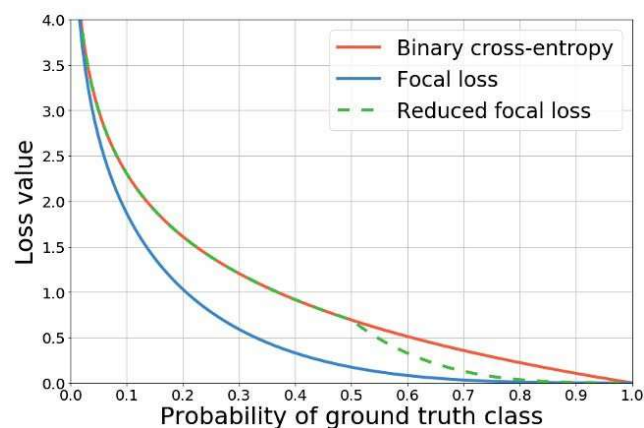

Figure 1: Loss functions tested in the grid search experiment.

Binary cross-entropy is a standard loss function used for training neural networks for binary classification problems. Weighted binary cross-entropy assigns more weight to positive examples which translates to more contribution to the model weights' (parameters) update coming from these examples. In our case, we set the weight of positive examples to the prevalence of negative examples (cells that do not contain an object). This way, the magnitude of contribution from positive and negative examples to the model weights' update was equalized. Focal loss function has a scaling factor that reduces value for well classified examples ( $p_t > 0.5$ ) and gives relatively more value for difficult examples.

Reduced focal loss is equal to binary cross entropy for values of  $p_t$  that are lower than threshold  $\theta$ . Above that threshold, reduced focal loss value is smoothly reduced to focal loss, as shown in Figure 1.

| Loss function                 | Formula                                                                                                                                                                              |
|-------------------------------|--------------------------------------------------------------------------------------------------------------------------------------------------------------------------------------|
| binary cross-entropy          | $CE(p, y) = -\log(p_t)$ , where $p_t = \begin{cases} p & \text{if } y = 1 \\ 1 - p & \text{otherwise} \end{cases}$                                                                   |
| weighted binary cross-entropy | $WCE(p, y) = \begin{cases} -w \cdot \log(p_t) & \text{if } y = 1 \\ -(1 - w) \cdot \log(p_t) & \text{otherwise} \end{cases}$                                                         |
| focal loss                    | $FL(p, y) = -\alpha(1 - p_t)^\gamma \log(p_t)$                                                                                                                                       |
| reduced focal loss            | $RFL(p, y) = -\alpha f(\theta) \log(p_t)$ , where $f(\theta) = \begin{cases} 1 & \text{if } p_t < \theta \\ \left(\frac{1-p_t}{\theta}\right)^\gamma & \text{otherwise} \end{cases}$ |

Table 1: Formulas of the loss functions tested in the grid search experiment.

## 2 Hyper-parameters grid search experiment

In total, we trained 768 models and the results from all runs are provided in the Appendix A. In the hyper-parameter grid search experiments, models were trained on the biopsied cases from the training set. Since we trained the models on 2D input data (slice images), we randomly sampled slice images containing ground truth boxes. Evaluation was done after every epoch on positive slice images from biopsied cases in the validation set. For every epoch and every model, the same positive slice from each DBT volume was selected to ensure comparable performance. For each set of hyper-parameters, selection of the best snapshot of model weights was based on sensitivity at 2 false positives (FP) per slice.

For each loss function we selected the best performing model for 3D evaluation on the entire validation set. Following this 3D evaluation, the model with the highest sensitivity at 2 FPs per

DBT volume on the validation set was used to generate predictions on the test set for the final evaluation. The entire process of selecting the final model for 3D evaluation on the test set is shown in Figure 2.

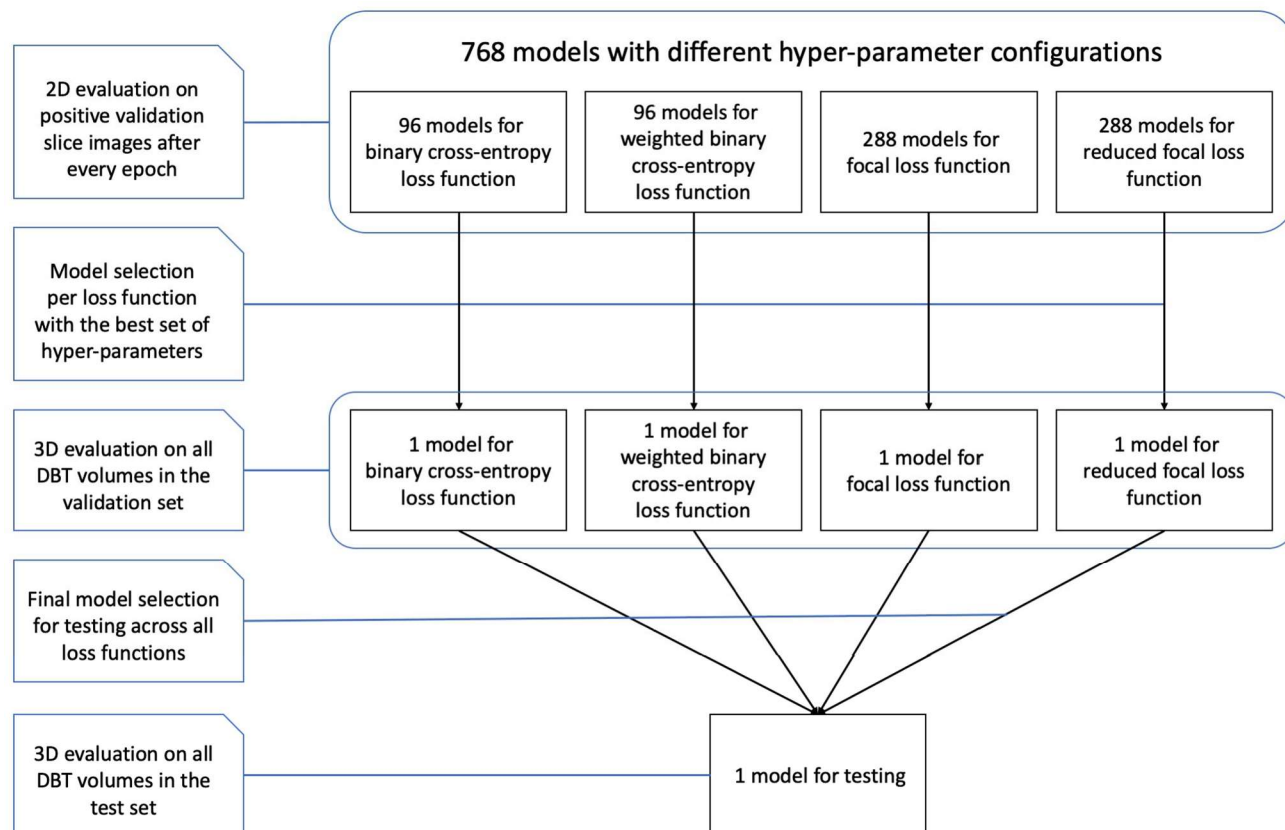

Figure 2: Model selection process.

For measuring performance of detection models we used the free-response receiver operating characteristic (FROC) curve which shows sensitivity of the model in relation to the number of false positive (FP) predictions placed in slice images, volumes, or cases. Points on the FROC curve correspond to model sensitivity and the number of FPs at different thresholds for predicted scores. Each predicted box is associated with a score value ranging from 0.0 to 1.0. Higher score value means that a model is more confident about its prediction. For the score threshold value of 1.0, there are no predictions with predicted score higher than 1.0, which means that sensitivity is 0.0 and the number of FPs is also 0.0. We compute sensitivity and the number of FPs for all possible threshold values. As we reduce the threshold, if some of the boxes with predicted score value above the

threshold are true positive predictions, sensitivity increases. Similarly, as we reduce the threshold, if some of the boxes with predicted score value above the threshold are false positives, the number of FPs increases. In the 2D evaluation, the number of FPs was computed per slice image. Slice image is a cross section of DBT volume. In the 3D evaluation, the number of FPs was computed per DBT volume.

### 3 Results

Figure 3. shows a box plot summarizing the evaluation of different loss functions on the validation set using a 2D per-slice evaluation. All tested loss functions performed similarly with the best configuration for each loss achieving over 78% sensitivity at 2 FP per slice. Table 2. compares performance of the best model between the 4 tested loss functions.

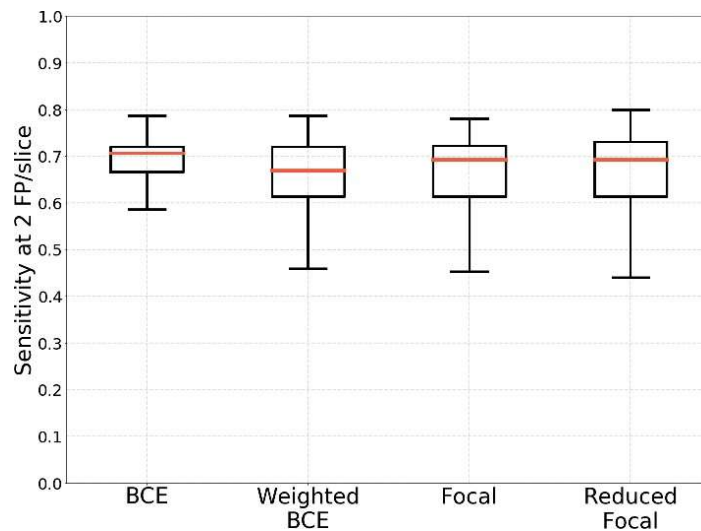

Figure 3: Comparison of different loss functions to address the class imbalance problem: the evaluation on positive cases using sensitivity at 2 FP per slice. BCE = binary cross-entropy.

| Loss function                       | binary cross-entropy | weighted binary cross-entropy | focal loss | reduced focal loss |
|-------------------------------------|----------------------|-------------------------------|------------|--------------------|
| Sensitivity at 2 FPs per slice      | 79%                  | 79%                           | 78%        | 80%                |
| Sensitivity at 2 FPs per DBT volume | 59%                  | 59%                           | 60%        | 58%                |

Table 2: Comparison of the best models for the 4 tested loss functions on the validation set.

Using the best model from the grid search for each loss function in the 2D per-slice evaluation, we ran inference and evaluated selected models on the entire validation set using the 3D per-volume evaluation. The best performance of 60% sensitivity at 2 FP per DBT volume was achieved by the network trained using focal loss. FROC curves for the selected model on the validation set is shown in Figure 4.

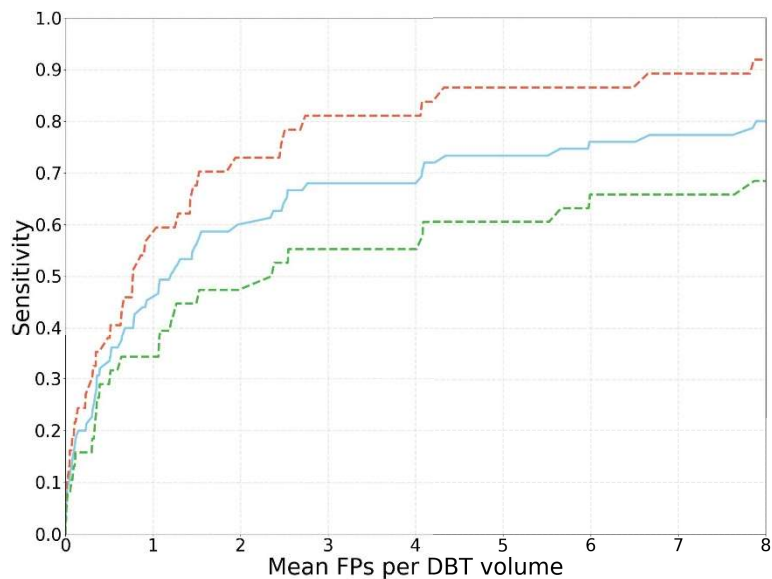

Figure 4: FROC curves showing performance on validation set of a model trained using focal loss. Red curve corresponds to cancer and not biopsied cases, green to benign and not biopsied cases, and blue curve is for all cases (biopsied and not biopsied).

## 4 Exclusions from initial population

Duke Health Systems' DEDUCE (Duke Enterprise Data Unified Content Explorer) tool was queried to obtain all radiology reports having the word 'tomosynthesis' and all pathology reports having the word 'breast' within the search dates of January 1, 2014 to January 30, 2018. The image download based on the study dates and medical record numbers obtained from the radiology reports resulted in an initial collection of 16 802 studies from 13 954 patients performed between August 26, 2014 and January 29, 2018 with at least one of the four reconstruction volumes: left craniocaudal (LCC), right craniocaudal (RCC), left mediolateral oblique (LMLO), right mediolateral oblique (RMLO) available. We excluded

11 192 cases that did not follow the inclusion criteria for any of the four groups. The primary reasons for exclusions are

- having less than four reconstruction views (for normal, actionable, and benign groups),
- BIRADS 2 and 3 (for normal, benign, and cancer groups),
- spot compression,
- imaging exams or biopsies due to the presence of calcifications/microcalcifications (for actionable, benign, and cancer groups).

Furthermore, cases were excluded for referring to multiple imaging studies/modalities (DBT + MRI, DBT + previous DBT, DBT + Ultrasound) in the radiology reports and causing ambiguity to determine if an abnormality was actually seen in the DBT. We also excluded benign, bilateral masses that end up being cysts based on comparison with previous DBT exam(s).

## eReferences.

- [1] Mateusz Buda, Atsuto Maki, and Maciej A Mazurowski. A systematic study of the class imbalance problem in convolutional neural networks. *Neural Networks*, 106:249–259, 2018.
- [2] Tsung-Yi Lin, Priya Goyal, Ross Girshick, Kaiming He, and Piotr Dollár. Focal loss for dense object detection. In *Proceedings of the IEEE international conference on computer vision*, pages 2980–2988, 2017.
- [3] Nikolay Sergievskiy and Alexander Ponamarev. Reduced focal loss: 1st place solution to xview object detection in satellite imagery. *arXiv preprint arXiv:1903.01347*, 2019.



## eAppendix 2. Results From All Model Runs

| Run ID                   | Name  | Source Type | Source Name | User | Status   | alpha |
|--------------------------|-------|-------------|-------------|------|----------|-------|
| c3362eeadcd041779d2aa8   | LOCAL | param_searc | root        |      | FINISHED | 1     |
| 27d1b997791f4e4e900774   | LOCAL | param_searc | root        |      | FINISHED | 1     |
| 3805634a92274f28874baf   | LOCAL | param_searc | root        |      | FINISHED | 1     |
| 9adf2bb9ffa9449694875b9  | LOCAL | param_searc | root        |      | FINISHED | 1     |
| 6b86a2df065a4a7094d623   | LOCAL | param_searc | root        |      | FINISHED | 1     |
| 4742e2a23ae4440187ed14   | LOCAL | param_searc | root        |      | FINISHED | 1     |
| 6b013a612f254238a72f99   | LOCAL | param_searc | root        |      | FINISHED | 1     |
| 35dba5f646024085af829d   | LOCAL | param_searc | root        |      | FINISHED | 1     |
| 263c42eb8c36419f9de592   | LOCAL | param_searc | root        |      | FINISHED | 1     |
| 9c19fff5c6d64565a368f39  | LOCAL | param_searc | root        |      | FINISHED | 1     |
| 8ce4998089d74bf5890791   | LOCAL | param_searc | root        |      | FINISHED | 1     |
| 8ce7edcbd3cb4c168e61f4   | LOCAL | param_searc | root        |      | FINISHED | 1     |
| 76b67567f1d04518a3f13a   | LOCAL | param_searc | root        |      | FINISHED | 1     |
| d0312120ca474cdbb34640   | LOCAL | param_searc | root        |      | FINISHED | 1     |
| 0a50316b9dd4435fa6b33c   | LOCAL | param_searc | root        |      | FINISHED | 1     |
| 99f8a334a7af468ebf97ac9  | LOCAL | param_searc | root        |      | FINISHED | 1     |
| 757178e6254843569899ec   | LOCAL | param_searc | root        |      | FINISHED | 1     |
| 6205f423f890476b8e9cd9   | LOCAL | param_searc | root        |      | FINISHED | 1     |
| 8e235f270ef843d49fdff58  | LOCAL | param_searc | root        |      | FINISHED | 1     |
| f4b8e7ccc41b4ac2952fc38  | LOCAL | param_searc | root        |      | FINISHED | 1     |
| fb950ac669c44de5ac55c3f  | LOCAL | param_searc | root        |      | FINISHED | 1     |
| 3077ac93d2804a368fa54d   | LOCAL | param_searc | root        |      | FINISHED | 1     |
| 635172a4f75c4879b414b9   | LOCAL | param_searc | root        |      | FINISHED | 1     |
| 389f74481b4642018d4532   | LOCAL | param_searc | root        |      | FINISHED | 1     |
| 7e8eb682369b479b89c0ca   | LOCAL | param_searc | root        |      | FINISHED | 1     |
| 30ff827a9b404a17aaed5a8  | LOCAL | param_searc | root        |      | FINISHED | 1     |
| 19220d97d03b4da6843e6    | LOCAL | param_searc | root        |      | FINISHED | 1     |
| 08be910ee13545099917d    | LOCAL | param_searc | root        |      | FINISHED | 1     |
| e917cc5755cb4898845833   | LOCAL | param_searc | root        |      | FINISHED | 1     |
| 9382030378c94c1cb4930a   | LOCAL | param_searc | root        |      | FINISHED | 1     |
| 43d1b0942b5f4c18b3f930   | LOCAL | param_searc | root        |      | FINISHED | 1     |
| d873a732f6d14cbb983dec   | LOCAL | param_searc | root        |      | FINISHED | 1     |
| 12652ab2d59940b593115    | LOCAL | param_searc | root        |      | FINISHED | 1     |
| ff0b2f92bc554e308cf5539  | LOCAL | param_searc | root        |      | FINISHED | 1     |
| db25dfc4dc454ac29da328   | LOCAL | param_searc | root        |      | FINISHED | 1     |
| 38b839d680884a6496826    | LOCAL | param_searc | root        |      | FINISHED | 1     |
| 30ffc90c556f4eb6af00c1ea | LOCAL | param_searc | root        |      | FINISHED | 1     |
| 393a2ce8c01b4d4284f4d3   | LOCAL | param_searc | root        |      | FINISHED | 1     |

|                         |       |             |      |          |     |
|-------------------------|-------|-------------|------|----------|-----|
| cc40e42189f94ca4aaa6dc3 | LOCAL | param_searc | root | FINISHED | 1   |
| a885bb7f1f244059be8557  | LOCAL | param_searc | root | FINISHED | 1   |
| 5b6b3ca33c7b4ad9a6d7f6  | LOCAL | param_searc | root | FINISHED | 1   |
| a28e750fa509490eb1a643  | LOCAL | param_searc | root | FINISHED | 1   |
| 627a1cb73a0044df8d915c  | LOCAL | param_searc | root | FINISHED | 1   |
| a4b93eb1b3d74028bb935   | LOCAL | param_searc | root | FINISHED | 1   |
| 70f753391f0f4fbc945fe97 | LOCAL | param_searc | root | FINISHED | 1   |
| 3a61761490344cc895fe34  | LOCAL | param_searc | root | FINISHED | 1   |
| b6e350edf3b74cbba39adb  | LOCAL | param_searc | root | FINISHED | 1   |
| 2d479eb98cbf4ab7bb1ad9  | LOCAL | param_searc | root | FINISHED | 1   |
| 266c5a496ec640d7afe180  | LOCAL | param_searc | root | FINISHED | 0.5 |
| 7bdab82aba5240e6bea624  | LOCAL | param_searc | root | FINISHED | 0.5 |
| 546da823fb4e475c92e45e  | LOCAL | param_searc | root | FINISHED | 0.5 |
| c2ff203934c34e789c91703 | LOCAL | param_searc | root | FINISHED | 0.5 |
| 45f0a37d440f4571bcb768  | LOCAL | param_searc | root | FINISHED | 0.5 |
| acd95a73b2184124b43d6d  | LOCAL | param_searc | root | FINISHED | 0.5 |
| a0a3f3149e1644bfaa0ee7c | LOCAL | param_searc | root | FINISHED | 0.5 |
| c515aaa891e24276a1fb9a  | LOCAL | param_searc | root | FINISHED | 0.5 |
| 4d045fedae34ae39391e7   | LOCAL | param_searc | root | FINISHED | 0.5 |
| 67f9d16787cc4b32940195  | LOCAL | param_searc | root | FINISHED | 0.5 |
| 51fe2bec08d64ecaa041eb  | LOCAL | param_searc | root | FINISHED | 0.5 |
| 04df749efe7740069d82dd  | LOCAL | param_searc | root | FINISHED | 0.5 |
| 1d3b36bd58ff42c380d9e1  | LOCAL | param_searc | root | FINISHED | 0.5 |
| 268f00d7f18c4f1c82a0a73 | LOCAL | param_searc | root | FINISHED | 0.5 |
| 032b076d16f34ee093b4f8  | LOCAL | param_searc | root | FINISHED | 0.5 |
| 1099dfd8380c45fca47c3e9 | LOCAL | param_searc | root | FINISHED | 0.5 |
| cf88f5138668461ab38f7fd | LOCAL | param_searc | root | FINISHED | 0.5 |
| 62d4595854234069b164f0  | LOCAL | param_searc | root | FINISHED | 0.5 |
| 0a1ca9772d0444cfbe9bc6  | LOCAL | param_searc | root | FINISHED | 0.5 |
| ceb0bb72b0054e03a6d451  | LOCAL | param_searc | root | FINISHED | 0.5 |
| b644e3b0b60f4331b59141  | LOCAL | param_searc | root | FINISHED | 0.5 |
| dca5f1b39b3443788d188c  | LOCAL | param_searc | root | FINISHED | 0.5 |
| f404b49279384531ad496e  | LOCAL | param_searc | root | FINISHED | 0.5 |
| 76a57a6975eb4546a019f3  | LOCAL | param_searc | root | FINISHED | 0.5 |
| 7ec9b26d953646848112f5  | LOCAL | param_searc | root | FINISHED | 0.5 |
| 552a810f06e24012871e5d  | LOCAL | param_searc | root | FINISHED | 0.5 |
| 9d1f4d172e114991abe882  | LOCAL | param_searc | root | FINISHED | 0.5 |
| 18d67db069544c63860746  | LOCAL | param_searc | root | FINISHED | 0.5 |
| 816b7a7c6f8f435cbdbcd8  | LOCAL | param_searc | root | FINISHED | 0.5 |
| e778e05e922b45ae9d55d4  | LOCAL | param_searc | root | FINISHED | 0.5 |
| 60d6edb5432146ac815b33  | LOCAL | param_searc | root | FINISHED | 0.5 |

|                         |       |             |      |          |      |
|-------------------------|-------|-------------|------|----------|------|
| 4bfc1701ba73449eb3f041  | LOCAL | param_searc | root | FINISHED | 0.5  |
| d7d75186becb4f37ba26a3  | LOCAL | param_searc | root | FINISHED | 0.5  |
| dca447e2a7c2495089c88ff | LOCAL | param_searc | root | FINISHED | 0.5  |
| 5f60f43889b846abb20884  | LOCAL | param_searc | root | FINISHED | 0.5  |
| 06d1d1109e844e844e844e  | LOCAL | param_searc | root | FINISHED | 0.5  |
| ff03f455abbc4d6f83b1ae3 | LOCAL | param_searc | root | FINISHED | 0.5  |
| 095d9f83f66f4c8a85f5349 | LOCAL | param_searc | root | FINISHED | 0.5  |
| 6d479f9639344eb7bf9902  | LOCAL | param_searc | root | FINISHED | 0.5  |
| 084503d8d79941ffb184d1  | LOCAL | param_searc | root | FINISHED | 0.5  |
| 6211b85006fb4e17909fb7  | LOCAL | param_searc | root | FINISHED | 0.5  |
| 327ac14c9bd046c28e1f05  | LOCAL | param_searc | root | FINISHED | 0.5  |
| 890a4ec00b6845b1a919d0  | LOCAL | param_searc | root | FINISHED | 0.5  |
| 7a520e8de7f94a7f881723  | LOCAL | param_searc | root | FINISHED | 0.5  |
| 7aae6ca24de744469bcef7  | LOCAL | param_searc | root | FINISHED | 0.5  |
| 7ad2a265ed3649318b7814  | LOCAL | param_searc | root | FINISHED | 0.5  |
| b09cc16ba50b43ec857301  | LOCAL | param_searc | root | FINISHED | 0.5  |
| 27af3c043b1c4228932794  | LOCAL | param_searc | root | FINISHED | 0.5  |
| 5305c69a84454d458ed608  | LOCAL | param_searc | root | FINISHED | 0.25 |
| aa64f571a2194e32ab1825  | LOCAL | param_searc | root | FINISHED | 0.25 |
| 15f12c293295468a91445c  | LOCAL | param_searc | root | FINISHED | 0.25 |
| 3aa042f26a6e43988b7756  | LOCAL | param_searc | root | FINISHED | 0.25 |
| 8d1269b65c474bec8595ac  | LOCAL | param_searc | root | FINISHED | 0.25 |
| e24e50ad0b0742ee8c775f  | LOCAL | param_searc | root | FINISHED | 0.25 |
| a876968047ed4670b86016  | LOCAL | param_searc | root | FINISHED | 0.25 |
| 6867b9ea6f814db580d6d4  | LOCAL | param_searc | root | FINISHED | 0.25 |
| ea8f15b475dc4758974e7f  | LOCAL | param_searc | root | FINISHED | 0.25 |
| e1c0a26d48cb44c19f7f442 | LOCAL | param_searc | root | FINISHED | 0.25 |
| eba44e0bbe9546e79a0d7f  | LOCAL | param_searc | root | FINISHED | 0.25 |
| 4ca787edb6124feda4a209  | LOCAL | param_searc | root | FINISHED | 0.25 |
| 350fac73a2054312820511  | LOCAL | param_searc | root | FINISHED | 0.25 |
| fad63c8e6cce48cc824745a | LOCAL | param_searc | root | FINISHED | 0.25 |
| b1367900d41547f1a2c917  | LOCAL | param_searc | root | FINISHED | 0.25 |
| 9c70df4efead43c3b57ae2e | LOCAL | param_searc | root | FINISHED | 0.25 |
| 9af7559d38464ceb9a10    | LOCAL | param_searc | root | FINISHED | 0.25 |
| 76ab910f7d524664851146  | LOCAL | param_searc | root | FINISHED | 0.25 |
| abf235710514440eab8c46  | LOCAL | param_searc | root | FINISHED | 0.25 |
| 5fcc0506e76542ab8576f96 | LOCAL | param_searc | root | FINISHED | 0.25 |
| d77c1ec2f7914c19882b54  | LOCAL | param_searc | root | FINISHED | 0.25 |
| 5b81d7d580c2437b8b863f  | LOCAL | param_searc | root | FINISHED | 0.25 |
| 314323f6687d4af1bd78a2  | LOCAL | param_searc | root | FINISHED | 0.25 |
| 50653730c14f4bc391780e  | LOCAL | param_searc | root | FINISHED | 0.25 |

|                         |       |             |      |          |      |
|-------------------------|-------|-------------|------|----------|------|
| bde1a42dec764ab7b454bc  | LOCAL | param_searc | root | FINISHED | 0.25 |
| 185fd3407e9b46918929ea  | LOCAL | param_searc | root | FINISHED | 0.25 |
| 3a8862bd16b54ea78b33b   | LOCAL | param_searc | root | FINISHED | 0.25 |
| ab68800db9f247ba9b957e  | LOCAL | param_searc | root | FINISHED | 0.25 |
| e2f5f25300d640e9a9fc1bd | LOCAL | param_searc | root | FINISHED | 0.25 |
| 51d20db1c4cd4af5b10939  | LOCAL | param_searc | root | FINISHED | 0.25 |
| ea0f73f336bb44108c3949  | LOCAL | param_searc | root | FINISHED | 0.25 |
| d0697c1b1fd34bc9a0230e  | LOCAL | param_searc | root | FINISHED | 0.25 |
| 80f4af4b1f4d4d92b1602a3 | LOCAL | param_searc | root | FINISHED | 0.25 |
| b74f75c92d0b490c8dceaf6 | LOCAL | param_searc | root | FINISHED | 0.25 |
| 38ec0b9968f74747803cf71 | LOCAL | param_searc | root | FINISHED | 0.25 |
| d9a4c0c608fc4de093859ca | LOCAL | param_searc | root | FINISHED | 0.25 |
| ee1964bdb95d4fb4941379  | LOCAL | param_searc | root | FINISHED | 0.25 |
| 4fc733d48e9444d594dc86  | LOCAL | param_searc | root | FINISHED | 0.25 |
| 4eaa1633df224646910cc1  | LOCAL | param_searc | root | FINISHED | 0.25 |
| 26dd0203adeb4e7a98a536  | LOCAL | param_searc | root | FINISHED | 0.25 |
| fb88ec4eafd54693b46d7cd | LOCAL | param_searc | root | FINISHED | 0.25 |
| cbf9ad209c5f4e99b4ad305 | LOCAL | param_searc | root | FINISHED | 0.25 |
| 1e997a80f2fe4227a14eb1  | LOCAL | param_searc | root | FINISHED | 0.25 |
| 3f20e97714694552820796  | LOCAL | param_searc | root | FINISHED | 0.25 |
| 73fb69e1f7dd484eaea1f5e | LOCAL | param_searc | root | FINISHED | 0.25 |
| 0b89a082569847e790cbf7  | LOCAL | param_searc | root | FINISHED | 0.25 |
| 75b4cfabac0a4e53a72237  | LOCAL | param_searc | root | FINISHED | 0.25 |
| 8a0cd824c98048f7b14f3a8 | LOCAL | param_searc | root | FINISHED | 0.25 |
| 0a8eca50aa8e46f192ddb9  | LOCAL | param_searc | root | FINISHED | 1    |
| 7b4154607faa411ca084cf5 | LOCAL | param_searc | root | FINISHED | 1    |
| 1dc5584a02954131a0df79  | LOCAL | param_searc | root | FINISHED | 1    |
| 8acb0ec616e24c23aab7a8  | LOCAL | param_searc | root | FINISHED | 1    |
| b8f080b0ff23430bba33572 | LOCAL | param_searc | root | FINISHED | 1    |
| 6d976fa80f0d46018804e3  | LOCAL | param_searc | root | FINISHED | 1    |
| 90e90be7e2fa4e2db54e8d  | LOCAL | param_searc | root | FINISHED | 1    |
| f4cdae54272f4e31b40122  | LOCAL | param_searc | root | FINISHED | 1    |
| a4fe06033ad9473b833d22  | LOCAL | param_searc | root | FINISHED | 1    |
| 050b625f4821493da612c5  | LOCAL | param_searc | root | FINISHED | 1    |
| d06ee5d3bb264120bdfbc9  | LOCAL | param_searc | root | FINISHED | 1    |
| 700960bb6a4943c68458c7  | LOCAL | param_searc | root | FINISHED | 1    |
| 2d2ff2f37439498bb7b3d4f | LOCAL | param_searc | root | FINISHED | 1    |
| 4e19c686ed8f477683a1ee  | LOCAL | param_searc | root | FINISHED | 1    |
| f4b17465e9df4039ab48fe8 | LOCAL | param_searc | root | FINISHED | 1    |
| 5ebf7fe1365c47f898d69d6 | LOCAL | param_searc | root | FINISHED | 1    |
| a33885dd956b40b8872fe1  | LOCAL | param_searc | root | FINISHED | 1    |

|                                |                  |          |     |
|--------------------------------|------------------|----------|-----|
| 8490709fa4614c8da8068f1LOCAL   | param_searc root | FINISHED | 1   |
| 5b92ce13eb4f44cd9d4f112LOCAL   | param_searc root | FINISHED | 1   |
| bc58b8cb41e94b47b8ef3f LOCAL   | param_searc root | FINISHED | 1   |
| 0a09a6b257e74eb38bfe7f LOCAL   | param_searc root | FINISHED | 1   |
| 3026bff587ac413f8fe1310 LOCAL  | param_searc root | FINISHED | 1   |
| 67f4b3e4138743df938823 LOCAL   | param_searc root | FINISHED | 1   |
| defa5d2095304935abf799 LOCAL   | param_searc root | FINISHED | 1   |
| 776115a1f4a24beabbf660 LOCAL   | param_searc root | FINISHED | 1   |
| 6fb580613ff140ff8f245866 LOCAL | param_searc root | FINISHED | 1   |
| f29c62e84b55410fa86e415LOCAL   | param_searc root | FINISHED | 1   |
| 13e79c43f58d4706afdd47 LOCAL   | param_searc root | FINISHED | 1   |
| fcad71537da34ccd9a72f09 LOCAL  | param_searc root | FINISHED | 1   |
| da7dbfddb8eb4a95ba6941 LOCAL   | param_searc root | FINISHED | 1   |
| fbff5b634ae24b1b99f34bd LOCAL  | param_searc root | FINISHED | 1   |
| 859b315bf1f54850af7c01d LOCAL  | param_searc root | FINISHED | 1   |
| cf966aaeb42b429ba49c9e LOCAL   | param_searc root | FINISHED | 1   |
| 6f10749e4b3948e3a96a44 LOCAL   | param_searc root | FINISHED | 1   |
| 106804ce8844448e85a49dLOCAL    | param_searc root | FINISHED | 1   |
| e8f626435a434875b37f72 LOCAL   | param_searc root | FINISHED | 1   |
| 722d031698cd4714bc5f35 LOCAL   | param_searc root | FINISHED | 1   |
| 0df1f48ce3fc4d989d41e4a LOCAL  | param_searc root | FINISHED | 1   |
| cda1ded12a224b4ebd5d40LOCAL    | param_searc root | FINISHED | 1   |
| c2920c5ed16c4574a74d00 LOCAL   | param_searc root | FINISHED | 1   |
| c9d3e0e62e32426992c993 LOCAL   | param_searc root | FINISHED | 1   |
| dfb391a1ee5f4e309ba36b LOCAL   | param_searc root | FINISHED | 1   |
| 31e188aa533a4670a26a28 LOCAL   | param_searc root | FINISHED | 1   |
| 742b8712d5744e029cd3ef LOCAL   | param_searc root | FINISHED | 1   |
| fdd51605fc8c40afaf127c60LOCAL  | param_searc root | FINISHED | 1   |
| 37102db1173e424195bb8 LOCAL    | param_searc root | FINISHED | 1   |
| b4adb25fc1284176bd3589 LOCAL   | param_searc root | FINISHED | 1   |
| a8d002cbe17d457db180fa LOCAL   | param_searc root | FINISHED | 1   |
| 8df30679831248869f7bdd LOCAL   | param_searc root | FINISHED | 0.5 |
| ec4b85398d3f409c8bad8c LOCAL   | param_searc root | FINISHED | 0.5 |
| 41337da9f96d4f0ba02e1b LOCAL   | param_searc root | FINISHED | 0.5 |
| d4756eef0164467ab9323c LOCAL   | param_searc root | FINISHED | 0.5 |
| 382809e3a2f040f9bbf9fb7 LOCAL  | param_searc root | FINISHED | 0.5 |
| 3d62328a1c134a93a1e92e LOCAL   | param_searc root | FINISHED | 0.5 |
| f809941de16a456f9fe5943LOCAL   | param_searc root | FINISHED | 0.5 |
| 006997a115404c948f119a LOCAL   | param_searc root | FINISHED | 0.5 |
| f3299c1e575b4b1a836e7e LOCAL   | param_searc root | FINISHED | 0.5 |
| 34c51b613a7142e5b3f6e0 LOCAL   | param_searc root | FINISHED | 0.5 |

|                          |       |             |      |          |      |
|--------------------------|-------|-------------|------|----------|------|
| 2c8d9dd734fb4581a8a819   | LOCAL | param_searc | root | FINISHED | 0.5  |
| 36cfc177c68d4679a39324f  | LOCAL | param_searc | root | FINISHED | 0.5  |
| 58c2dfdd81d54b36b16834   | LOCAL | param_searc | root | FINISHED | 0.5  |
| 60965e150ae243448ae267   | LOCAL | param_searc | root | FINISHED | 0.5  |
| 7413bffe794744389ef8c2c  | LOCAL | param_searc | root | FINISHED | 0.5  |
| 39fd92f8f4174a58a1303ac  | LOCAL | param_searc | root | FINISHED | 0.5  |
| 67fcbce5ccd1a44e19e3781f | LOCAL | param_searc | root | FINISHED | 0.5  |
| e844cc6b0ece4b32a56763   | LOCAL | param_searc | root | FINISHED | 0.5  |
| 25bf56b7e40748ee9cc77e   | LOCAL | param_searc | root | FINISHED | 0.5  |
| 9f07883129c840a48aa422   | LOCAL | param_searc | root | FINISHED | 0.5  |
| 0b7a23cb763c43d1a6ac41   | LOCAL | param_searc | root | FINISHED | 0.5  |
| 46d2a1a6da61485f8a6e46   | LOCAL | param_searc | root | FINISHED | 0.5  |
| c74cd70d339f4ce9b1ac866  | LOCAL | param_searc | root | FINISHED | 0.5  |
| 29f4cc2a1c9d4b88b7a21d   | LOCAL | param_searc | root | FINISHED | 0.5  |
| 520e026b1ac443eebdc737   | LOCAL | param_searc | root | FINISHED | 0.5  |
| f4f763c1dd954fb7b6f5f8d  | LOCAL | param_searc | root | FINISHED | 0.5  |
| b3f7a417bc5848e5b5317b   | LOCAL | param_searc | root | FINISHED | 0.5  |
| 12eca17e85824f33af0c022  | LOCAL | param_searc | root | FINISHED | 0.5  |
| f5f2cebd350b4b1abd363c   | LOCAL | param_searc | root | FINISHED | 0.5  |
| b8c318e410c549a4abd76a   | LOCAL | param_searc | root | FINISHED | 0.5  |
| d8b2e940cd3f44e88fd698   | LOCAL | param_searc | root | FINISHED | 0.5  |
| 1dc9e221082f4c39b97e95   | LOCAL | param_searc | root | FINISHED | 0.5  |
| fe2eb039a76d451196df8c   | LOCAL | param_searc | root | FINISHED | 0.5  |
| 85586388a62a411b8d9352   | LOCAL | param_searc | root | FINISHED | 0.5  |
| 3d7c929fd3284ade9a3956   | LOCAL | param_searc | root | FINISHED | 0.5  |
| 9b8268b5dce946f687cfcdf  | LOCAL | param_searc | root | FINISHED | 0.5  |
| ccdd54c649594b5a931ca8   | LOCAL | param_searc | root | FINISHED | 0.5  |
| 8159fc75aafc40bf8f1c2744 | LOCAL | param_searc | root | FINISHED | 0.5  |
| e6f569f3161f4d2b9d50480  | LOCAL | param_searc | root | FINISHED | 0.5  |
| 82461a9e1786452c9aa194   | LOCAL | param_searc | root | FINISHED | 0.5  |
| c503102507fb48d2960ecc   | LOCAL | param_searc | root | FINISHED | 0.5  |
| bb5a5d26d1bc4b83ab512f   | LOCAL | param_searc | root | FINISHED | 0.5  |
| 21333efdabe14182bf308d   | LOCAL | param_searc | root | FINISHED | 0.5  |
| 209b1e2f17b840a5bc2743   | LOCAL | param_searc | root | FINISHED | 0.5  |
| 7ad90ec840cb44f7a78a27   | LOCAL | param_searc | root | FINISHED | 0.5  |
| e85480c4a17c40bd8ea480   | LOCAL | param_searc | root | FINISHED | 0.5  |
| d42f1bf3213a40c58e46cb2  | LOCAL | param_searc | root | FINISHED | 0.5  |
| 038714449fa849d290cec5   | LOCAL | param_searc | root | FINISHED | 0.5  |
| 097b159327d34eb5aff367   | LOCAL | param_searc | root | FINISHED | 0.25 |
| df056d8bfe4946b4be8c71   | LOCAL | param_searc | root | FINISHED | 0.25 |
| 7f795f3bc343420ba801d2   | LOCAL | param_searc | root | FINISHED | 0.25 |

|                         |       |             |      |          |      |
|-------------------------|-------|-------------|------|----------|------|
| 2779f018914a4d989b6d75  | LOCAL | param_searc | root | FINISHED | 0.25 |
| 7c487fd50caa4c89b8c1a14 | LOCAL | param_searc | root | FINISHED | 0.25 |
| f1037a5e9e924c9babb9d1  | LOCAL | param_searc | root | FINISHED | 0.25 |
| eaf8c09f33b54221898b97  | LOCAL | param_searc | root | FINISHED | 0.25 |
| c0da7e166c8846bb817cd0  | LOCAL | param_searc | root | FINISHED | 0.25 |
| 9f3ed860f94445f8b3a3ac6 | LOCAL | param_searc | root | FINISHED | 0.25 |
| 7fb21d3e1bbc44c3b66dff  | LOCAL | param_searc | root | FINISHED | 0.25 |
| 745b37790c144520995874  | LOCAL | param_searc | root | FINISHED | 0.25 |
| 9fa2e998b5264164941fd4  | LOCAL | param_searc | root | FINISHED | 0.25 |
| 7f5e7d3c9f5b49e0934d7d  | LOCAL | param_searc | root | FINISHED | 0.25 |
| b74eb3313f9843f390f5097 | LOCAL | param_searc | root | FINISHED | 0.25 |
| 2096f1ca541741659bf00a6 | LOCAL | param_searc | root | FINISHED | 0.25 |
| b8973f4b662d4f65b8f5c42 | LOCAL | param_searc | root | FINISHED | 0.25 |
| 6a568125e682466fa0f3b4  | LOCAL | param_searc | root | FINISHED | 0.25 |
| bed82b4696e84f4e9de554  | LOCAL | param_searc | root | FINISHED | 0.25 |
| d8c87bbf3e654ad7a0cd7f6 | LOCAL | param_searc | root | FINISHED | 0.25 |
| 5432e370a4b04cc8ad26db  | LOCAL | param_searc | root | FINISHED | 0.25 |
| 4b0507dff001467a88ab35  | LOCAL | param_searc | root | FINISHED | 0.25 |
| de34848405294143ba910a  | LOCAL | param_searc | root | FINISHED | 0.25 |
| 3b69d0e735844e0aa94f69  | LOCAL | param_searc | root | FINISHED | 0.25 |
| be73d49989f145b1b9ec3d  | LOCAL | param_searc | root | FINISHED | 0.25 |
| ca6366af4b0f42daab81fa0 | LOCAL | param_searc | root | FINISHED | 0.25 |
| df87fb3720fa430aad1285  | LOCAL | param_searc | root | FINISHED | 0.25 |
| bc5d76d546364c2bafc2a8  | LOCAL | param_searc | root | FINISHED | 0.25 |
| 64f721f05d5842c68981c8d | LOCAL | param_searc | root | FINISHED | 0.25 |
| 07dff55b70ab463d8030a3  | LOCAL | param_searc | root | FINISHED | 0.25 |
| 6c04dd9e34a44fa2b1e505  | LOCAL | param_searc | root | FINISHED | 0.25 |
| a7ce65caed374629b9592b  | LOCAL | param_searc | root | FINISHED | 0.25 |
| bd9e3a54ddc640df8067b1  | LOCAL | param_searc | root | FINISHED | 0.25 |
| 61b5be258f464043a6b215  | LOCAL | param_searc | root | FINISHED | 0.25 |
| 72513658ec974beab2e039  | LOCAL | param_searc | root | FINISHED | 0.25 |
| 0b7cac65565f4328879582  | LOCAL | param_searc | root | FINISHED | 0.25 |
| 5e5dcbebc0b546a2944bfa  | LOCAL | param_searc | root | FINISHED | 0.25 |
| efbc54be26d74927b7d87b  | LOCAL | param_searc | root | FINISHED | 0.25 |
| b098d2a40495423db0f132  | LOCAL | param_searc | root | FINISHED | 0.25 |
| f5a905dffbf48a49271a09f | LOCAL | param_searc | root | FINISHED | 0.25 |
| 866e037a96e54193be1bc8  | LOCAL | param_searc | root | FINISHED | 0.25 |
| d4d79a3c74144a7f9158eb  | LOCAL | param_searc | root | FINISHED | 0.25 |
| 0d57295492214e1abfc304  | LOCAL | param_searc | root | FINISHED | 0.25 |
| adafd0ec085749a6bf44699 | LOCAL | param_searc | root | FINISHED | 0.25 |
| b505be9d9dcd45afa463a5  | LOCAL | param_searc | root | FINISHED | 0.25 |

|                          |       |             |      |          |      |
|--------------------------|-------|-------------|------|----------|------|
| b0b4476c41c041ebac0472   | LOCAL | param_searc | root | FINISHED | 0.25 |
| 5645a649793d495fb8f484   | LOCAL | param_searc | root | FINISHED | 0.25 |
| 8398172e4f044ee4a5ae9f   | LOCAL | param_searc | root | FINISHED | 0.25 |
| 90b3d9d091484c568e308d   | LOCAL | param_searc | root | FINISHED | 0.25 |
| 51f721ef37084faea722292  | LOCAL | param_searc | root | FINISHED | 1    |
| dabea235ad444efc8ce168   | LOCAL | param_searc | root | FINISHED | 1    |
| c9256f1d14af4792918b11   | LOCAL | param_searc | root | FINISHED | 1    |
| 6777a7c536e34621a1878d   | LOCAL | param_searc | root | FINISHED | 1    |
| 9eb610bbbaa443b39a8ef0   | LOCAL | param_searc | root | FINISHED | 1    |
| 760b4001de084560ba069    | LOCAL | param_searc | root | FINISHED | 1    |
| 0e39ca61767548839350fc   | LOCAL | param_searc | root | FINISHED | 1    |
| 3b306ab55b5946a592b18    | LOCAL | param_searc | root | FINISHED | 1    |
| 6f2f501c84d043468188d9   | LOCAL | param_searc | root | FINISHED | 1    |
| 999742841f05470f8ddd66   | LOCAL | param_searc | root | FINISHED | 1    |
| 52e19f2e45dc4dc7bf08868  | LOCAL | param_searc | root | FINISHED | 1    |
| 802dc632d413411f9c06a1   | LOCAL | param_searc | root | FINISHED | 1    |
| 3c597673b7ea4d929ed181   | LOCAL | param_searc | root | FINISHED | 1    |
| 838595b1bef34769aee3cc   | LOCAL | param_searc | root | FINISHED | 1    |
| 89ddce2d4746457c8bc444   | LOCAL | param_searc | root | FINISHED | 1    |
| bd410d7f85ff411ba22d791  | LOCAL | param_searc | root | FINISHED | 1    |
| f7221b398199464aa09d3a   | LOCAL | param_searc | root | FINISHED | 1    |
| eacb3c428e80448f9b753c   | LOCAL | param_searc | root | FINISHED | 1    |
| a4b77182d45c499ea6e5dc   | LOCAL | param_searc | root | FINISHED | 1    |
| 4bcaef15dceb46c9925674   | LOCAL | param_searc | root | FINISHED | 1    |
| 66e6739f3ea24062a65316   | LOCAL | param_searc | root | FINISHED | 1    |
| be60be3ec6c445a7a6bdb5   | LOCAL | param_searc | root | FINISHED | 1    |
| 6638d16e038442a2a3e8d1   | LOCAL | param_searc | root | FINISHED | 1    |
| 6d8b9faa6e3945beb96843   | LOCAL | param_searc | root | FINISHED | 1    |
| 36471c8aedba4aecbadd82   | LOCAL | param_searc | root | FINISHED | 1    |
| 77ddccf6a1ad4490a0d71f7  | LOCAL | param_searc | root | FINISHED | 1    |
| 239e4d0c0ee7425fa40501   | LOCAL | param_searc | root | FINISHED | 1    |
| aa77962b19fe4007b8d897   | LOCAL | param_searc | root | FINISHED | 1    |
| ebbde2379ac947e9be8634   | LOCAL | param_searc | root | FINISHED | 1    |
| 5d52d21fb66e49a8b2eeac   | LOCAL | param_searc | root | FINISHED | 1    |
| c53e45a3fe424a69af40d64  | LOCAL | param_searc | root | FINISHED | 1    |
| ada677ecc3ce467884d873   | LOCAL | param_searc | root | FINISHED | 1    |
| 77fa81ffb7c44af596a4ca68 | LOCAL | param_searc | root | FINISHED | 0.5  |
| 5b37d5ca4049435cb32f01   | LOCAL | param_searc | root | FINISHED | 0.5  |
| 790dd0cf59ac4d1e9794a1   | LOCAL | param_searc | root | FINISHED | 0.5  |
| 5c3a0c48c7d54b2fab9851   | LOCAL | param_searc | root | FINISHED | 0.5  |
| fc433a5340624960855091   | LOCAL | param_searc | root | FINISHED | 0.5  |



|                                |                  |          |      |
|--------------------------------|------------------|----------|------|
| 998dba3607854c7ea43812LOCAL    | param_searc root | FINISHED | 0.5  |
| 06d0010f6ee246628591f1 LOCAL   | param_searc root | FINISHED | 0.5  |
| bffb1843445f4c0ea31b96a LOCAL  | param_searc root | FINISHED | 0.5  |
| 2d77ece324b74f688b2ee9 LOCAL   | param_searc root | FINISHED | 0.5  |
| 4c55865ae91b4642b3d25c LOCAL   | param_searc root | FINISHED | 0.5  |
| a04419a41f2a40d6953325 LOCAL   | param_searc root | FINISHED | 0.5  |
| a255c94af5c6468295a017 LOCAL   | param_searc root | FINISHED | 0.5  |
| 2161cd5f710f47b9bfc823e LOCAL  | param_searc root | FINISHED | 0.5  |
| 3ecfff5321064913914ff4f6 LOCAL | param_searc root | FINISHED | 0.5  |
| 2c41872dfb28441b8458ac LOCAL   | param_searc root | FINISHED | 0.5  |
| f894f73748bf4c7796547d1 LOCAL  | param_searc root | FINISHED | 0.5  |
| 86956af10aed4c4581287b LOCAL   | param_searc root | FINISHED | 0.5  |
| 58653aa5790849c6ada70f LOCAL   | param_searc root | FINISHED | 0.5  |
| 30b7340245614985a384b LOCAL    | param_searc root | FINISHED | 0.5  |
| 6819418ce1dc4494a8a318 LOCAL   | param_searc root | FINISHED | 0.5  |
| c5ff03cc3b2443ac98d4700 LOCAL  | param_searc root | FINISHED | 0.5  |
| 57178e0b1d0546eb82eda LOCAL    | param_searc root | FINISHED | 0.5  |
| 235c6c582c0a44e8bf5ab5 LOCAL   | param_searc root | FINISHED | 0.5  |
| 035bf80cabbe4a88806444 LOCAL   | param_searc root | FINISHED | 0.5  |
| bc997e8dc37d4dfc9b6010 LOCAL   | param_searc root | FINISHED | 0.5  |
| 897596c769ff43f0b0d10e3 LOCAL  | param_searc root | FINISHED | 0.5  |
| a6f2bad854da403db59cd3 LOCAL   | param_searc root | FINISHED | 0.5  |
| a74dc66df3564dbcb6fd25 LOCAL   | param_searc root | FINISHED | 0.5  |
| 95277920d62b4496ba5bc4LOCAL    | param_searc root | FINISHED | 0.5  |
| 384e170820ae46209f89a8 LOCAL   | param_searc root | FINISHED | 0.5  |
| 017533249b93432d934c59LOCAL    | param_searc root | FINISHED | 0.5  |
| a7b5b1d40fe04a46bbc81a LOCAL   | param_searc root | FINISHED | 0.5  |
| 1e44d5d1add14b4bb3a35 LOCAL    | param_searc root | FINISHED | 0.25 |
| 6fe5137ca72045cca5d8e51LOCAL   | param_searc root | FINISHED | 0.25 |
| 4abd90dace2442ec95b370 LOCAL   | param_searc root | FINISHED | 0.25 |
| 8d0ca55f257e49e7a8e344 LOCAL   | param_searc root | FINISHED | 0.25 |
| d5a91efbffca427b805d513 LOCAL  | param_searc root | FINISHED | 0.25 |
| 7a46cb5ba76a4db599386f LOCAL   | param_searc root | FINISHED | 0.25 |
| 60cf905235864df7b0bceb6LOCAL   | param_searc root | FINISHED | 0.25 |
| c7712893c805428b8f8e37 LOCAL   | param_searc root | FINISHED | 0.25 |
| 300fb76a35234879b07246 LOCAL   | param_searc root | FINISHED | 0.25 |
| 07501dd1714044fc9e1f36 LOCAL   | param_searc root | FINISHED | 0.25 |
| dc10eff6772c4e07bc0b233LOCAL   | param_searc root | FINISHED | 0.25 |
| f9539d2b9e684bfb940c21 LOCAL   | param_searc root | FINISHED | 0.25 |
| 543f4451740d4e43870b66 LOCAL   | param_searc root | FINISHED | 0.25 |
| 9164b886a9994889a68a51LOCAL    | param_searc root | FINISHED | 0.25 |

|                         |       |             |      |          |      |
|-------------------------|-------|-------------|------|----------|------|
| 1f5837a0dd08426eb2c460  | LOCAL | param_searc | root | FINISHED | 0.25 |
| 28d3ad6f76a54046adb4ab  | LOCAL | param_searc | root | FINISHED | 0.25 |
| 07a7534715574a748dfc84  | LOCAL | param_searc | root | FINISHED | 0.25 |
| 89f2871c386742d3a1ac0e  | LOCAL | param_searc | root | FINISHED | 0.25 |
| a3ea32efe6bb4452b92029  | LOCAL | param_searc | root | FINISHED | 0.25 |
| 12d1a6f490794095aee079  | LOCAL | param_searc | root | FINISHED | 0.25 |
| ad71d801df4c445ebca26c  | LOCAL | param_searc | root | FINISHED | 0.25 |
| d6da76d281e04e8cae929a  | LOCAL | param_searc | root | FINISHED | 0.25 |
| 022d8c75b45b4540b00a6e  | LOCAL | param_searc | root | FINISHED | 0.25 |
| d0820887cba7426a9201ea  | LOCAL | param_searc | root | FINISHED | 0.25 |
| 9d662b83a4b24f9594f5ba  | LOCAL | param_searc | root | FINISHED | 0.25 |
| 50daea21cadb4024bdb054  | LOCAL | param_searc | root | FINISHED | 0.25 |
| f34e14ce756a4d15baf22d2 | LOCAL | param_searc | root | FINISHED | 0.25 |
| c54d56c87a72491ebd39e3  | LOCAL | param_searc | root | FINISHED | 0.25 |
| 4508ebd62b074a1880f84e  | LOCAL | param_searc | root | FINISHED | 0.25 |
| 433f2ea68ae2413bb37c96  | LOCAL | param_searc | root | FINISHED | 0.25 |
| b95ff1baf76d4f1eb57f5a9 | LOCAL | param_searc | root | FINISHED | 0.25 |
| ed18e9d4a65f41e5b07e25  | LOCAL | param_searc | root | FINISHED | 0.25 |
| 59dde7f6311744d2b3c325  | LOCAL | param_searc | root | FINISHED | 1    |
| 6419ac33c57a4b45bc8673  | LOCAL | param_searc | root | FINISHED | 1    |
| 73a30f5badaa4bd8a69df2  | LOCAL | param_searc | root | FINISHED | 1    |
| 26f4c6b20d8c47f1a36d9f0 | LOCAL | param_searc | root | FINISHED | 1    |
| 436f55e080fe45a5a85cf4a | LOCAL | param_searc | root | FINISHED | 1    |
| 7e7774413ff44564935c04  | LOCAL | param_searc | root | FINISHED | 1    |
| 8c8c4bcbd7414c0488c9dc  | LOCAL | param_searc | root | FINISHED | 1    |
| c1bbfd98846f498aac464e4 | LOCAL | param_searc | root | FINISHED | 1    |
| 4c51dd37683140a0a98f89  | LOCAL | param_searc | root | FINISHED | 1    |
| 5ffab48b87e34cb0bf2f890 | LOCAL | param_searc | root | FINISHED | 1    |
| a4bb5dbc49474ab99cb22b  | LOCAL | param_searc | root | FINISHED | 1    |
| fdc650f50174420d86e3c89 | LOCAL | param_searc | root | FINISHED | 1    |
| 4ea7c220ec084ff99a69622 | LOCAL | param_searc | root | FINISHED | 1    |
| 2f737cb7e52e4f16a65a15d | LOCAL | param_searc | root | FINISHED | 1    |
| ad3261f7758a4dec36887   | LOCAL | param_searc | root | FINISHED | 1    |
| 0720973e01ba429284f382  | LOCAL | param_searc | root | FINISHED | 1    |
| 9ffd85da9303455cb9191d  | LOCAL | param_searc | root | FINISHED | 1    |
| 951ce1056bfe472887550b  | LOCAL | param_searc | root | FINISHED | 1    |
| 9df096b115e64524b00c21  | LOCAL | param_searc | root | FINISHED | 1    |
| 13c8fcbf345541818cee8dd | LOCAL | param_searc | root | FINISHED | 1    |
| d8c3f4a785ec4dccb5325d  | LOCAL | param_searc | root | FINISHED | 1    |
| e679a33a1d334c31bc3b44  | LOCAL | param_searc | root | FINISHED | 1    |
| db563ca78d0346e1a4a270  | LOCAL | param_searc | root | FINISHED | 1    |

|                         |       |             |      |          |     |
|-------------------------|-------|-------------|------|----------|-----|
| e1ebcf5007cf48ef8485034 | LOCAL | param_searc | root | FINISHED | 1   |
| d213866d1733487e8f7bd5  | LOCAL | param_searc | root | FINISHED | 1   |
| 41f17a704d824cc2a06978  | LOCAL | param_searc | root | FINISHED | 1   |
| 4b88ebb2d7a7405d9194a   | LOCAL | param_searc | root | FINISHED | 1   |
| 66163b3c0c464bcc0cf539  | LOCAL | param_searc | root | FINISHED | 1   |
| af262f9b63644cf388597e7 | LOCAL | param_searc | root | FINISHED | 1   |
| 7ff5f8153a2546e8991bb61 | LOCAL | param_searc | root | FINISHED | 1   |
| c2ba87def7184769a6171f7 | LOCAL | param_searc | root | FINISHED | 1   |
| 3fbbea3cce124042901f455 | LOCAL | param_searc | root | FINISHED | 1   |
| 8a45a6e1bff44eaab32a84d | LOCAL | param_searc | root | FINISHED | 1   |
| ace835b580bc41518c7375  | LOCAL | param_searc | root | FINISHED | 1   |
| 1d605b5d72824a5a816582  | LOCAL | param_searc | root | FINISHED | 1   |
| f5216a3010be41ba9b07e6  | LOCAL | param_searc | root | FINISHED | 1   |
| d01b7c0dabc24b3b87dbce  | LOCAL | param_searc | root | FINISHED | 1   |
| b80ad095a3d944a7a2143d  | LOCAL | param_searc | root | FINISHED | 1   |
| 3ddb21adb4ff49b3b3e30d  | LOCAL | param_searc | root | FINISHED | 1   |
| 3e126b0f8e1c4225a2aff61 | LOCAL | param_searc | root | FINISHED | 1   |
| ce25d922b7d642ba84a8e2  | LOCAL | param_searc | root | FINISHED | 1   |
| e99cc71e712b454b900e3d  | LOCAL | param_searc | root | FINISHED | 1   |
| 46fe5826447e41a3a2f686  | LOCAL | param_searc | root | FINISHED | 1   |
| e0c5dd65e44a4643bff7fb  | LOCAL | param_searc | root | FINISHED | 1   |
| e764df1ea991485490b45f  | LOCAL | param_searc | root | FINISHED | 1   |
| 0e2abe4d6eae4b16b42f51  | LOCAL | param_searc | root | FINISHED | 1   |
| 908b40a4732f496486f73f6 | LOCAL | param_searc | root | FINISHED | 1   |
| 7b9ac44fe2b04d259ed539  | LOCAL | param_searc | root | FINISHED | 1   |
| cd686ee1ac414d31ac2750  | LOCAL | param_searc | root | FINISHED | 0.5 |
| f7d4ae5621eb4eae8d34c8  | LOCAL | param_searc | root | FINISHED | 0.5 |
| e894659c34c2416a8cd100  | LOCAL | param_searc | root | FINISHED | 0.5 |
| 73b94414413c4d6c8cfe99  | LOCAL | param_searc | root | FINISHED | 0.5 |
| 59518148527f4f38b94951  | LOCAL | param_searc | root | FINISHED | 0.5 |
| e65b8fcdf14b4f37b99a7ae | LOCAL | param_searc | root | FINISHED | 0.5 |
| 8b8cbffac58840e2b2b3629 | LOCAL | param_searc | root | FINISHED | 0.5 |
| 2cfd8e9967b4f068b96326  | LOCAL | param_searc | root | FINISHED | 0.5 |
| 08697b6fee834dcdb8d13a  | LOCAL | param_searc | root | FINISHED | 0.5 |
| b0cd336ff04f48dfadc31e5 | LOCAL | param_searc | root | FINISHED | 0.5 |
| 276c6f18d20f48cdb644bd  | LOCAL | param_searc | root | FINISHED | 0.5 |
| 632103379665469fb76e3c  | LOCAL | param_searc | root | FINISHED | 0.5 |
| 5b34d7d098ce4399a16e8d  | LOCAL | param_searc | root | FINISHED | 0.5 |
| 9c58599ca05a48e28770c7  | LOCAL | param_searc | root | FINISHED | 0.5 |
| c90c7a8c426d4a95b3fa75  | LOCAL | param_searc | root | FINISHED | 0.5 |
| 14dd269a209541ba84f013  | LOCAL | param_searc | root | FINISHED | 0.5 |

|                          |       |             |      |          |      |
|--------------------------|-------|-------------|------|----------|------|
| c7e33dd32430497b8a50da   | LOCAL | param_searc | root | FINISHED | 0.5  |
| 74058123577540cd843ad2   | LOCAL | param_searc | root | FINISHED | 0.5  |
| 432c9cddf91743ab938f983  | LOCAL | param_searc | root | FINISHED | 0.5  |
| cc38828ccc5a45e282b341   | LOCAL | param_searc | root | FINISHED | 0.5  |
| b278265a66b0475ea87eb4   | LOCAL | param_searc | root | FINISHED | 0.5  |
| b31cdee4434d47d48b5277   | LOCAL | param_searc | root | FINISHED | 0.5  |
| 3f2c1dcfcec14107b16f141f | LOCAL | param_searc | root | FINISHED | 0.5  |
| 1487192efeeb4d558a570a   | LOCAL | param_searc | root | FINISHED | 0.5  |
| 24adad179a7a43619b2148   | LOCAL | param_searc | root | FINISHED | 0.5  |
| 2ee3461b62ba4d1580620    | LOCAL | param_searc | root | FINISHED | 0.5  |
| f3e40f13fc524b3b92b9664  | LOCAL | param_searc | root | FINISHED | 0.5  |
| 605eb3990d124c79af98eb   | LOCAL | param_searc | root | FINISHED | 0.5  |
| 0df0f1afb378495e8dde4ee  | LOCAL | param_searc | root | FINISHED | 0.5  |
| b01f71d51d0745d19235e0   | LOCAL | param_searc | root | FINISHED | 0.5  |
| eb9f11d5ebd243b5873f8b   | LOCAL | param_searc | root | FINISHED | 0.5  |
| b4eec257b8fa4ee084c2ca1  | LOCAL | param_searc | root | FINISHED | 0.5  |
| d7ae7b7dbdf84a39889339   | LOCAL | param_searc | root | FINISHED | 0.5  |
| 611c3edddd544ab2aad4d8   | LOCAL | param_searc | root | FINISHED | 0.5  |
| 85a37ee0378e4902b1b9d5   | LOCAL | param_searc | root | FINISHED | 0.5  |
| c89adab4f3614fbc8b1b590  | LOCAL | param_searc | root | FINISHED | 0.5  |
| 96f980fa5bb447fbbf625bd  | LOCAL | param_searc | root | FINISHED | 0.5  |
| fb0620515cc940b187d762   | LOCAL | param_searc | root | FINISHED | 0.5  |
| 5c292f4f98dd4a07a04db5   | LOCAL | param_searc | root | FINISHED | 0.5  |
| 426a5fb92e3b4abab11fb4f  | LOCAL | param_searc | root | FINISHED | 0.5  |
| 98d9c65e4bfd47f4a23fb8c  | LOCAL | param_searc | root | FINISHED | 0.5  |
| 262578edb41f4a05880c13   | LOCAL | param_searc | root | FINISHED | 0.5  |
| 5adbeb22aea34293942e21   | LOCAL | param_searc | root | FINISHED | 0.5  |
| bb2879e7143247499c9649   | LOCAL | param_searc | root | FINISHED | 0.5  |
| a4d1e62f7a6a41da97ecffc  | LOCAL | param_searc | root | FINISHED | 0.5  |
| b017d306910d4ab69d278    | LOCAL | param_searc | root | FINISHED | 0.5  |
| 56fd70465b864336b94456   | LOCAL | param_searc | root | FINISHED | 0.5  |
| 10de06c3f2d7483eb1c1a4   | LOCAL | param_searc | root | FINISHED | 0.5  |
| a867c25e2a4c413ab9e718   | LOCAL | param_searc | root | FINISHED | 0.25 |
| 2d68a7f96c9342bab8ec3d   | LOCAL | param_searc | root | FINISHED | 0.25 |
| 4b4a3cb9d1444d0ea513dc   | LOCAL | param_searc | root | FINISHED | 0.25 |
| b6e9936503d4456e87951    | LOCAL | param_searc | root | FINISHED | 0.25 |
| dbf788685fbf4d3c98b401d  | LOCAL | param_searc | root | FINISHED | 0.25 |
| cd8aecdf30154869a9498d   | LOCAL | param_searc | root | FINISHED | 0.25 |
| a2f49ca6e58848b5a4322e   | LOCAL | param_searc | root | FINISHED | 0.25 |
| e79c01f441734dcfbcd8d60  | LOCAL | param_searc | root | FINISHED | 0.25 |
| 693c3c636ea345b8913c05   | LOCAL | param_searc | root | FINISHED | 0.25 |

|                          |       |             |      |          |      |
|--------------------------|-------|-------------|------|----------|------|
| 0ef87b234994438ca8d9eb   | LOCAL | param_searc | root | FINISHED | 0.25 |
| 7d6d315fb99644138e3e4e   | LOCAL | param_searc | root | FINISHED | 0.25 |
| f4a760f95f5842edb13f24a  | LOCAL | param_searc | root | FINISHED | 0.25 |
| b5b71cf9c1ff45b3bb9eebe  | LOCAL | param_searc | root | FINISHED | 0.25 |
| 67c2001adf4245a9bef241d  | LOCAL | param_searc | root | FINISHED | 0.25 |
| e9b27c61b8394a558f8d26   | LOCAL | param_searc | root | FINISHED | 0.25 |
| bb2a7c5d33224e1da95491   | LOCAL | param_searc | root | FINISHED | 0.25 |
| d2c2d937e2eb405388f11a   | LOCAL | param_searc | root | FINISHED | 0.25 |
| a24c389b0c6e4d15a37716   | LOCAL | param_searc | root | FINISHED | 0.25 |
| 71c996814e7d4032877c32   | LOCAL | param_searc | root | FINISHED | 0.25 |
| 35c529288fda45d189d21e   | LOCAL | param_searc | root | FINISHED | 0.25 |
| cd1cdc002b4247f989a2d4   | LOCAL | param_searc | root | FINISHED | 0.25 |
| 7f183284a7b9454aa81f34f  | LOCAL | param_searc | root | FINISHED | 0.25 |
| cb55f1d7bd9e4e8db17eec   | LOCAL | param_searc | root | FINISHED | 0.25 |
| 19ddd982043e44d48f9e6c   | LOCAL | param_searc | root | FINISHED | 0.25 |
| dbd82d6f2aa84568a679cd   | LOCAL | param_searc | root | FINISHED | 0.25 |
| 859ccb85160e4c0880cb97   | LOCAL | param_searc | root | FINISHED | 0.25 |
| 666913b1bce844ea8a3e24   | LOCAL | param_searc | root | FINISHED | 0.25 |
| c08a82784db24f7b9fe317   | LOCAL | param_searc | root | FINISHED | 0.25 |
| 9b1f5489e4f3496998bf07c  | LOCAL | param_searc | root | FINISHED | 0.25 |
| 52ec1947cb6c4171974ce2   | LOCAL | param_searc | root | FINISHED | 0.25 |
| b50b747fb3784d93b03591   | LOCAL | param_searc | root | FINISHED | 0.25 |
| 7f448dfa6384f8ba04553f   | LOCAL | param_searc | root | FINISHED | 0.25 |
| 15ab6071f77a415e8c9f1f2  | LOCAL | param_searc | root | FINISHED | 0.25 |
| 77f65d3e1361492da51918   | LOCAL | param_searc | root | FINISHED | 0.25 |
| 09d2e321046148e398d80    | LOCAL | param_searc | root | FINISHED | 0.25 |
| 89dba114446940f78a1104   | LOCAL | param_searc | root | FINISHED | 0.25 |
| 86aa5cf39ce143058ccb460  | LOCAL | param_searc | root | FINISHED | 0.25 |
| 26fcc80bf6349ee802c4c4   | LOCAL | param_searc | root | FINISHED | 0.25 |
| 5834f096fe5147cb88e190f  | LOCAL | param_searc | root | FINISHED | 0.25 |
| 80288ae4ea754a1cbb3b0c   | LOCAL | param_searc | root | FINISHED | 0.25 |
| 80bfa4e34ffe44f3b08f9595 | LOCAL | param_searc | root | FINISHED | 0.25 |
| 01fb64ad1fb0427b870374   | LOCAL | param_searc | root | FINISHED | 0.25 |
| fd153a55b16f438489e0fd3  | LOCAL | param_searc | root | FINISHED | 0.25 |
| ca278fddeb1540cc9f0c005  | LOCAL | param_searc | root | FINISHED | 0.25 |
| c3306d52377d4a0c953e50   | LOCAL | param_searc | root | FINISHED | 0.25 |
| 33d7f08162be4eed85ed51   | LOCAL | param_searc | root | FINISHED | 0.25 |
| fbf992d39b6248eda976ab   | LOCAL | param_searc | root | FINISHED | 0.25 |
| 72a72ee43aab435cac46f5   | LOCAL | param_searc | root | FINISHED | 0.25 |
| f2d31307df0547959dfcc29  | LOCAL | param_searc | root | FINISHED | 1    |
| 3a7b4098fb264d25a14a09   | LOCAL | param_searc | root | FINISHED | 1    |

|                          |       |             |      |          |   |
|--------------------------|-------|-------------|------|----------|---|
| 556e9af1044949a0a0b2f0f  | LOCAL | param_searc | root | FINISHED | 1 |
| 573ae955cbbf48ba9ef3f8b  | LOCAL | param_searc | root | FINISHED | 1 |
| 54e5a80f2cd24b298221b2   | LOCAL | param_searc | root | FINISHED | 1 |
| 93ff2bfa03bb48fa85ea4df3 | LOCAL | param_searc | root | FINISHED | 1 |
| 9a69f161be674b5aacdcc5   | LOCAL | param_searc | root | FINISHED | 1 |
| ed9f1ab1693a4d7ca11466   | LOCAL | param_searc | root | FINISHED | 1 |
| 07ba5c5770584042876a9b   | LOCAL | param_searc | root | FINISHED | 1 |
| d3af12d446fa421ba69564   | LOCAL | param_searc | root | FINISHED | 1 |
| b62f67189db64b8cb0ae2ff  | LOCAL | param_searc | root | FINISHED | 1 |
| a560d86aae5c409c97113b   | LOCAL | param_searc | root | FINISHED | 1 |
| 9a8c8ecf7945400b8c0719   | LOCAL | param_searc | root | FINISHED | 1 |
| c5b0022680e44bf9a6c94e   | LOCAL | param_searc | root | FINISHED | 1 |
| 036fbb14cada40aca44540   | LOCAL | param_searc | root | FINISHED | 1 |
| 332d70d1f58d4198a02d3e   | LOCAL | param_searc | root | FINISHED | 1 |
| f8579be19975415ab0b537   | LOCAL | param_searc | root | FINISHED | 1 |
| 74038285851145c488603b   | LOCAL | param_searc | root | FINISHED | 1 |
| 0e7c636c49c04f8080381a   | LOCAL | param_searc | root | FINISHED | 1 |
| 1091914706f4478bb7b39c   | LOCAL | param_searc | root | FINISHED | 1 |
| ad2f30500f224a2e8f035f9  | LOCAL | param_searc | root | FINISHED | 1 |
| 224f2832d625494682124b   | LOCAL | param_searc | root | FINISHED | 1 |
| 6f6027bc50fa4bf3a0fd555  | LOCAL | param_searc | root | FINISHED | 1 |
| e16fd96453bd491db3b17f   | LOCAL | param_searc | root | FINISHED | 1 |
| 5d237b2253df4b6b9cf39e   | LOCAL | param_searc | root | FINISHED | 1 |
| 3dd5110421504e91945d2    | LOCAL | param_searc | root | FINISHED | 1 |
| 6b9e5b0d10364026a4d61    | LOCAL | param_searc | root | FINISHED | 1 |
| a5fc9cd48de143fca155dda  | LOCAL | param_searc | root | FINISHED | 1 |
| 0fe431acd83b4416b4ec6d   | LOCAL | param_searc | root | FINISHED | 1 |
| ad3c2cff2397418481dd58b  | LOCAL | param_searc | root | FINISHED | 1 |
| 51bd7ff57d6f4b18b57ade7  | LOCAL | param_searc | root | FINISHED | 1 |
| e70cabaaa2874fc78a8c142  | LOCAL | param_searc | root | FINISHED | 1 |
| 64531823a65b4859886ba9   | LOCAL | param_searc | root | FINISHED | 1 |
| 80bb4cf44b8d4a73a0e112   | LOCAL | param_searc | root | FINISHED | 1 |
| 4d037d6ff76b473ca32341   | LOCAL | param_searc | root | FINISHED | 1 |
| 748780bac58644ccacef0a4  | LOCAL | param_searc | root | FINISHED | 1 |
| 8a068b38639d4fe5820030   | LOCAL | param_searc | root | FINISHED | 1 |
| d82208342bcf4818948cfac  | LOCAL | param_searc | root | FINISHED | 1 |
| 071d15cc8d8f4b3db2debd   | LOCAL | param_searc | root | FINISHED | 1 |
| 6eb25c8071614d53b48f1a   | LOCAL | param_searc | root | FINISHED | 1 |
| b32b01971511477eb57e1    | LOCAL | param_searc | root | FINISHED | 1 |
| 6ff60d5e6fb24d07b223ed1  | LOCAL | param_searc | root | FINISHED | 1 |
| 7fedcf7717d44825b2878d   | LOCAL | param_searc | root | FINISHED | 1 |

|                         |       |             |      |          |     |
|-------------------------|-------|-------------|------|----------|-----|
| 449d7b3166a44d3889e94c  | LOCAL | param_searc | root | FINISHED | 1   |
| 9b2b345b7ebf47849dfadc  | LOCAL | param_searc | root | FINISHED | 1   |
| e2164f1b1ba940609e0621  | LOCAL | param_searc | root | FINISHED | 1   |
| 747646e0f2784c3db3b18f  | LOCAL | param_searc | root | FINISHED | 1   |
| 4ca0e848297943f6965d89  | LOCAL | param_searc | root | FINISHED | 1   |
| 6589f1579c604698b92a3c  | LOCAL | param_searc | root | FINISHED | 0.5 |
| 674b210677d148258fabcb  | LOCAL | param_searc | root | FINISHED | 0.5 |
| 9b202ecd293a4d88aeed3f  | LOCAL | param_searc | root | FINISHED | 0.5 |
| 802e853ccf5f40468c50d56 | LOCAL | param_searc | root | FINISHED | 0.5 |
| dcdbef25a52048b3b6d6d2  | LOCAL | param_searc | root | FINISHED | 0.5 |
| 52d395b15a7d4d82a347d   | LOCAL | param_searc | root | FINISHED | 0.5 |
| 97aecfad039a4c4d95166a  | LOCAL | param_searc | root | FINISHED | 0.5 |
| 133373b835f241d5a7bc1c  | LOCAL | param_searc | root | FINISHED | 0.5 |
| e2802deb509541d782ea41  | LOCAL | param_searc | root | FINISHED | 0.5 |
| 05942cb30952445ca8b346  | LOCAL | param_searc | root | FINISHED | 0.5 |
| 348eb532d9a344bc9bacdd  | LOCAL | param_searc | root | FINISHED | 0.5 |
| 6121f3ffa8064da59450035 | LOCAL | param_searc | root | FINISHED | 0.5 |
| 60238ec1014a4f3cbe9d0e  | LOCAL | param_searc | root | FINISHED | 0.5 |
| ea160afb71f54bef820792f | LOCAL | param_searc | root | FINISHED | 0.5 |
| 22b06b219ed04570a02d6   | LOCAL | param_searc | root | FINISHED | 0.5 |
| f3dc4087e00946bdbbf377f | LOCAL | param_searc | root | FINISHED | 0.5 |
| 28604b9bde854e8786599   | LOCAL | param_searc | root | FINISHED | 0.5 |
| fb36964319b74367aba61d  | LOCAL | param_searc | root | FINISHED | 0.5 |
| 33375f95b82841e49c4376  | LOCAL | param_searc | root | FINISHED | 0.5 |
| 2ed1e90c380e4c1bb8734a  | LOCAL | param_searc | root | FINISHED | 0.5 |
| ca22ed8074ef48be8140a0  | LOCAL | param_searc | root | FINISHED | 0.5 |
| be709961ef53485fa6f47a8 | LOCAL | param_searc | root | FINISHED | 0.5 |
| 0b368e3bfd0c48a7961213  | LOCAL | param_searc | root | FINISHED | 0.5 |
| 135eaa3e4d8744a8aae5f2  | LOCAL | param_searc | root | FINISHED | 0.5 |
| 3abe46a58cc54170bb1cb7  | LOCAL | param_searc | root | FINISHED | 0.5 |
| 04fc35193c334abdaf6ca0c | LOCAL | param_searc | root | FINISHED | 0.5 |
| 0a31b2a7f2764a37abe73d  | LOCAL | param_searc | root | FINISHED | 0.5 |
| c0517b67ab944b93958ff9  | LOCAL | param_searc | root | FINISHED | 0.5 |
| 2e5d0bf0393749afa5cb3f8 | LOCAL | param_searc | root | FINISHED | 0.5 |
| fb09251b475b4ff99a7ba8f | LOCAL | param_searc | root | FINISHED | 0.5 |
| fce2e77f1da549faa0c5686 | LOCAL | param_searc | root | FINISHED | 0.5 |
| 006c06a42bcb4c71a0deb1  | LOCAL | param_searc | root | FINISHED | 0.5 |
| a14e6f27cdc244c9861a2a3 | LOCAL | param_searc | root | FINISHED | 0.5 |
| 3415066ad665421480a3ca  | LOCAL | param_searc | root | FINISHED | 0.5 |
| b445a4e3b1da4afcb9fa903 | LOCAL | param_searc | root | FINISHED | 0.5 |
| 237d873b0c4940dc9c8933  | LOCAL | param_searc | root | FINISHED | 0.5 |

|                          |       |             |      |          |      |
|--------------------------|-------|-------------|------|----------|------|
| 02b87d16bc514cebaaa306   | LOCAL | param_searc | root | FINISHED | 0.5  |
| 56006b313d0b47e0a4bf8d   | LOCAL | param_searc | root | FINISHED | 0.5  |
| 769c4e2cb76d44849761e8   | LOCAL | param_searc | root | FINISHED | 0.5  |
| a07f4ffb7af449268531795  | LOCAL | param_searc | root | FINISHED | 0.5  |
| 3679bbef1da9409fb9e839   | LOCAL | param_searc | root | FINISHED | 0.5  |
| 602200ffbd654dd7b35d55   | LOCAL | param_searc | root | FINISHED | 0.5  |
| 032be7e0a8044998ab22b3   | LOCAL | param_searc | root | FINISHED | 0.5  |
| b4cc997afca74ba28e06812  | LOCAL | param_searc | root | FINISHED | 0.5  |
| b0a8077f54e54458a1f596   | LOCAL | param_searc | root | FINISHED | 0.5  |
| ab3eabc86c844e5e8d044d   | LOCAL | param_searc | root | FINISHED | 0.5  |
| 04698c9ad5e24168844dc2   | LOCAL | param_searc | root | FINISHED | 0.5  |
| 1b8c446cd9f24772a71413   | LOCAL | param_searc | root | FINISHED | 0.5  |
| e26f220094d9418c92b0e5   | LOCAL | param_searc | root | FINISHED | 0.25 |
| 1d03df4b59df49d1a2f6fae  | LOCAL | param_searc | root | FINISHED | 0.25 |
| fc18c236d48f4e2cbbd3ccc  | LOCAL | param_searc | root | FINISHED | 0.25 |
| e3cf565c63db4491acdb2d   | LOCAL | param_searc | root | FINISHED | 0.25 |
| 07671aa2b9cb445387ca35   | LOCAL | param_searc | root | FINISHED | 0.25 |
| ca19cf4c5af446cdb1f2c28c | LOCAL | param_searc | root | FINISHED | 0.25 |
| 046ac3f96fa04030858ffba  | LOCAL | param_searc | root | FINISHED | 0.25 |
| fb782f08391449afa4c82fc0 | LOCAL | param_searc | root | FINISHED | 0.25 |
| 5bc32b84c59541ee96e8c9   | LOCAL | param_searc | root | FINISHED | 0.25 |
| 293661d6b64249ebbd52     | LOCAL | param_searc | root | FINISHED | 0.25 |
| c9ebc4befe584501900796   | LOCAL | param_searc | root | FINISHED | 0.25 |
| 7240572eedca4aa9a3f880   | LOCAL | param_searc | root | FINISHED | 0.25 |
| 3d19a35ef2c144f29ebf2bc  | LOCAL | param_searc | root | FINISHED | 0.25 |
| 70ee96bf8df64407b6a875   | LOCAL | param_searc | root | FINISHED | 0.25 |
| 6f224ea40194410a91ea1e   | LOCAL | param_searc | root | FINISHED | 0.25 |
| ed49117560c34058a5576e   | LOCAL | param_searc | root | FINISHED | 0.25 |
| 67c2a987b04c4bd3b6d0ba   | LOCAL | param_searc | root | FINISHED | 0.25 |
| f16a3f67ac5e44bd8e18001  | LOCAL | param_searc | root | FINISHED | 0.25 |
| 1be3c74299d6447abc78f0   | LOCAL | param_searc | root | FINISHED | 0.25 |
| bdf40abf1c064173b97edc8  | LOCAL | param_searc | root | FINISHED | 0.25 |
| 435668eb06924c51935e54   | LOCAL | param_searc | root | FINISHED | 0.25 |
| d76b59a1537e42919ba298   | LOCAL | param_searc | root | FINISHED | 0.25 |
| 2d313c5fd8bc492bbd3d44   | LOCAL | param_searc | root | FINISHED | 0.25 |
| 17a831b198314d8ca59cc8   | LOCAL | param_searc | root | FINISHED | 0.25 |
| 55e1d51e76ca48ebaa2693   | LOCAL | param_searc | root | FINISHED | 0.25 |
| ddfc01b796794eb78e8101   | LOCAL | param_searc | root | FINISHED | 0.25 |
| b78e867bf8284cd793033f   | LOCAL | param_searc | root | FINISHED | 0.25 |
| ed0d6ef1ff5446e3bb45469  | LOCAL | param_searc | root | FINISHED | 0.25 |
| 4c24ec75ef134f868f0c1b5  | LOCAL | param_searc | root | FINISHED | 0.25 |



|                               |                  |          |      |
|-------------------------------|------------------|----------|------|
| 1cd51b64f66a4966aeaa7d LOCAL  | param_searc root | FINISHED | 0.25 |
| feb8c4e761264b2a95ef399LOCAL  | param_searc root | FINISHED | 0.25 |
| ae6171e7dcf640ef91d1344LOCAL  | param_searc root | FINISHED | 0.25 |
| d723f0f355744d45a0bf428LOCAL  | param_searc root | FINISHED | 0.25 |
| 26e60f44e90f4a909e9fb22 LOCAL | param_searc root | FINISHED | 0.25 |
| 76f3f18eb66a4a58ae9a8b LOCAL  | param_searc root | FINISHED | 0.25 |
| b42938dbe95146999645f0 LOCAL  | param_searc root | FINISHED | 0.25 |
| 1c3a4449b4fe4370ad5d70 LOCAL  | param_searc root | FINISHED | 0.25 |
| 9c9eba27f6db4e8289f4c28LOCAL  | param_searc root | FINISHED | 0.25 |
| 8cb9a67366ce4a3d9344d0 LOCAL  | param_searc root | FINISHED | 0.25 |
| 77b7e32cb7774e5aa8c025 LOCAL  | param_searc root | FINISHED | 0.25 |
| 6baa640f73524f7c8dfb111 LOCAL | param_searc root | FINISHED | 0.25 |
| 88ba6d636601438f903e9c LOCAL  | param_searc root | FINISHED | 0.25 |
| 9d7b546c03fa49c5b6dbb7 LOCAL  | param_searc root | FINISHED | 0.25 |
| 45db22deea6c4875b5b72aLOCAL   | param_searc root | FINISHED | 0.25 |
| e15790eb4dae4af3a656d8 LOCAL  | param_searc root | FINISHED | 0.25 |
| e08a59b1f057461780ed8a LOCAL  | param_searc root | FINISHED | 0.25 |
| 1f41c98a18f645ef83b3c2f LOCAL | param_searc root | FINISHED | 0.25 |
| c1ad7c03e2834f1b8c7516 LOCAL  | param_searc root | FINISHED | 0.25 |
| 64cc25498e984bbf5d82 LOCAL    | param_searc root | FINISHED | 1    |
| 4942690d17a74f248f59f20LOCAL  | param_searc root | FINISHED | 1    |
| 9cc93165655d42caa7b3c8 LOCAL  | param_searc root | FINISHED | 1    |
| 2ec70c760ad34305ad583a LOCAL  | param_searc root | FINISHED | 1    |
| 5bba4a9e54e8436c86d65f LOCAL  | param_searc root | FINISHED | 1    |
| 3c599eafa9e846f98530c42 LOCAL | param_searc root | FINISHED | 1    |
| c3a8b747d996491fac1b2d LOCAL  | param_searc root | FINISHED | 1    |
| 12aa4c640e5e4244b36fb0 LOCAL  | param_searc root | FINISHED | 1    |
| e79f64124b7244268b7da5 LOCAL  | param_searc root | FINISHED | 1    |
| 5b1234b80ff04025834a06 LOCAL  | param_searc root | FINISHED | 1    |
| 6680c8c2faed441095d900 LOCAL  | param_searc root | FINISHED | 1    |
| c4e994ee5c4e4b7eba7719 LOCAL  | param_searc root | FINISHED | 1    |
| 5f8d3bbd350543c5847426 LOCAL  | param_searc root | FINISHED | 1    |
| 8f9e9e2dd5964e64bd441f LOCAL  | param_searc root | FINISHED | 1    |
| 60f8b7a0cd844dbbbbde41 LOCAL  | param_searc root | FINISHED | 1    |
| cb0c974484014f9ba8e9ce LOCAL  | param_searc root | FINISHED | 1    |
| 7296723e2b7e48e6a56386LOCAL   | param_searc root | FINISHED | 1    |
| 96facc844da34718baa88a LOCAL  | param_searc root | FINISHED | 1    |
| a6734d2983934056a409ac LOCAL  | param_searc root | FINISHED | 1    |
| c93df677ac5545e5a97dc8 LOCAL  | param_searc root | FINISHED | 1    |
| 5221a2def9504629ba7997 LOCAL  | param_searc root | FINISHED | 1    |
| fd6c8b15838247e8b75741 LOCAL  | param_searc root | FINISHED | 1    |

|                          |       |             |      |          |     |
|--------------------------|-------|-------------|------|----------|-----|
| 05c41e4f521e417583badc   | LOCAL | param_searc | root | FINISHED | 1   |
| 3b80b5baf86c48bba72582   | LOCAL | param_searc | root | FINISHED | 1   |
| ec2fd0fad7fd4f239d001af9 | LOCAL | param_searc | root | FINISHED | 1   |
| e74e11889cf6433cacb62b   | LOCAL | param_searc | root | FINISHED | 1   |
| 53ea59c56f064ef7bcf4b23  | LOCAL | param_searc | root | FINISHED | 1   |
| ae5e5983ac8b4bf78ec7e3   | LOCAL | param_searc | root | FINISHED | 1   |
| d780c94c37394cf3a4c0ba7  | LOCAL | param_searc | root | FINISHED | 1   |
| b0a95361e71546778639f9   | LOCAL | param_searc | root | FINISHED | 1   |
| 87c6677fd6c8467ab4808f9  | LOCAL | param_searc | root | FINISHED | 1   |
| 9353d57b14a5464b8ace69   | LOCAL | param_searc | root | FINISHED | 1   |
| 2e2b041d14394025b5d92    | LOCAL | param_searc | root | FINISHED | 0.5 |
| 53a2b67aa3944ebdb99668   | LOCAL | param_searc | root | FINISHED | 0.5 |
| 34368986285e4455b319a8   | LOCAL | param_searc | root | FINISHED | 0.5 |
| 49f3451bef7640d994312d   | LOCAL | param_searc | root | FINISHED | 0.5 |
| 0f0474cb9da64bda97ad9b   | LOCAL | param_searc | root | FINISHED | 0.5 |
| b321d0ee00514ed2ae7ce3   | LOCAL | param_searc | root | FINISHED | 0.5 |
| 2093078e2e9c4a75936a70   | LOCAL | param_searc | root | FINISHED | 0.5 |
| ebcfa762d4464a8ebb09ac   | LOCAL | param_searc | root | FINISHED | 0.5 |
| e35c1fbce71d46f096ab25e  | LOCAL | param_searc | root | FINISHED | 0.5 |
| 0119ed6c2113453ea20951   | LOCAL | param_searc | root | FINISHED | 0.5 |
| 4df83009202244cc8749fad  | LOCAL | param_searc | root | FINISHED | 0.5 |
| 67de63b0048a44d383b4b    | LOCAL | param_searc | root | FINISHED | 0.5 |
| f8c1f221c83241289b45f80  | LOCAL | param_searc | root | FINISHED | 0.5 |
| e29143e280104b6cbc271a   | LOCAL | param_searc | root | FINISHED | 0.5 |
| 8ebf4a244b1741968aaed4   | LOCAL | param_searc | root | FINISHED | 0.5 |
| fd487e5b01dc4a188d5522   | LOCAL | param_searc | root | FINISHED | 0.5 |
| ea7334f4f7504b8daac65b4  | LOCAL | param_searc | root | FINISHED | 0.5 |
| c1aa58af5c2c48e295baec7  | LOCAL | param_searc | root | FINISHED | 0.5 |
| eaf73cd2dbee4d68a2f68b   | LOCAL | param_searc | root | FINISHED | 0.5 |
| 6060042881114794967887   | LOCAL | param_searc | root | FINISHED | 0.5 |
| b7f9f82e22e249479646de   | LOCAL | param_searc | root | FINISHED | 0.5 |
| 85b36ca5fe2f4b6f9370ff05 | LOCAL | param_searc | root | FINISHED | 0.5 |
| 224239074eff4b8eaafaf4fa | LOCAL | param_searc | root | FINISHED | 0.5 |
| 7569d1106de44e9f890c15   | LOCAL | param_searc | root | FINISHED | 0.5 |
| ed253d07f05343c5bf67a1   | LOCAL | param_searc | root | FINISHED | 0.5 |
| 3e7f9cbd393a44b3b6d29d   | LOCAL | param_searc | root | FINISHED | 0.5 |
| d794ae9eea74444aa7d2ba   | LOCAL | param_searc | root | FINISHED | 0.5 |
| 784843218d7946718ab66    | LOCAL | param_searc | root | FINISHED | 0.5 |
| b0e55dde96ad4ddc8ae48e   | LOCAL | param_searc | root | FINISHED | 0.5 |
| dbb58d53c3bd4173aeea6d   | LOCAL | param_searc | root | FINISHED | 0.5 |
| f62937f1d4b244858c639a   | LOCAL | param_searc | root | FINISHED | 0.5 |

|                         |       |             |      |          |      |
|-------------------------|-------|-------------|------|----------|------|
| 2b0ed2bd990d4ba5b2320   | LOCAL | param_searc | root | FINISHED | 0.5  |
| 5f66d8125bdd40e297d331  | LOCAL | param_searc | root | FINISHED | 0.25 |
| ba8d5fedea8e4d3c892d2e  | LOCAL | param_searc | root | FINISHED | 0.25 |
| cef0440a1f714ff4b964aeb | LOCAL | param_searc | root | FINISHED | 0.25 |
| 766debc1db19448da95ce5  | LOCAL | param_searc | root | FINISHED | 0.25 |
| 989cb886bdba47fa814f70  | LOCAL | param_searc | root | FINISHED | 0.25 |
| 21dca7fd444e4cfbade0d25 | LOCAL | param_searc | root | FINISHED | 0.25 |
| ae3ed3f286c44cdd82d7dfa | LOCAL | param_searc | root | FINISHED | 0.25 |
| bf3bcadb64544b5add175   | LOCAL | param_searc | root | FINISHED | 0.25 |
| 68c4ac90a95d49c5b7c325  | LOCAL | param_searc | root | FINISHED | 0.25 |
| d73383bdb76e4d5582624   | LOCAL | param_searc | root | FINISHED | 0.25 |
| a6b9bff9690489985f789c  | LOCAL | param_searc | root | FINISHED | 0.25 |
| 9c37afb052634f66be77dd  | LOCAL | param_searc | root | FINISHED | 0.25 |
| 8fecb5756d9048f8b445a4  | LOCAL | param_searc | root | FINISHED | 0.25 |
| 3ae267bc353d4151943919  | LOCAL | param_searc | root | FINISHED | 0.25 |
| b0cf075b56994a59b2b94a  | LOCAL | param_searc | root | FINISHED | 0.25 |
| 9b6cf0ae99704c5ca29092  | LOCAL | param_searc | root | FINISHED | 0.25 |
| 6507563b5ba34a9ea7b1a6  | LOCAL | param_searc | root | FINISHED | 0.25 |
| 6f1d079a9b6c4a4dad8569  | LOCAL | param_searc | root | FINISHED | 0.25 |
| 0eb6e63ce4c240a499c019  | LOCAL | param_searc | root | FINISHED | 0.25 |
| 2ef3b00737804a3baf96b5  | LOCAL | param_searc | root | FINISHED | 0.25 |
| aaa834e7143349c6a1706b  | LOCAL | param_searc | root | FINISHED | 0.25 |
| 8c02c509fcd24653a435c8a | LOCAL | param_searc | root | FINISHED | 0.25 |
| 4e94af83358842479ea955  | LOCAL | param_searc | root | FINISHED | 0.25 |
| 9231891b48ac4f1ea620a8  | LOCAL | param_searc | root | FINISHED | 0.25 |
| d1db252cd603464ab55178  | LOCAL | param_searc | root | FINISHED | 0.25 |
| 81fe34147b5e4534a65e3f  | LOCAL | param_searc | root | FINISHED | 0.25 |
| 731943b2f9ee401b953eea  | LOCAL | param_searc | root | FINISHED | 0.25 |
| 9f47571393d14dba96a2c2  | LOCAL | param_searc | root | FINISHED | 0.25 |
| d732c822b3fd4c448de137  | LOCAL | param_searc | root | FINISHED | 0.25 |
| 58cf7bdb531743a2a0b811  | LOCAL | param_searc | root | FINISHED | 0.25 |
| 1c3bc38295ed4fde8a5f012 | LOCAL | param_searc | root | FINISHED | 0.25 |
| 72483f2dcf9949f5aa2d6d7 | LOCAL | param_searc | root | FINISHED | 0.25 |

| block_config    | bn_size | gamma | growth_rate | loss         | loss_fun                      | network |
|-----------------|---------|-------|-------------|--------------|-------------------------------|---------|
| (2, 6, 4, 12, 8 | 4       | 2     | 16          | reduced-foca | {'alpha': 1.0, '{'block_confi |         |
| (2, 6, 4, 12, 8 | 4       | 2     | 16          | reduced-foca | {'alpha': 1.0, '{'block_confi |         |
| (2, 6, 4, 12, 8 | 4       | 2     | 8           | reduced-foca | {'alpha': 1.0, '{'block_confi |         |
| (2, 6, 4, 12, 8 | 4       | 2     | 8           | reduced-foca | {'alpha': 1.0, '{'block_confi |         |
| (2, 6, 4, 12, 8 | 2       | 2     | 16          | reduced-foca | {'alpha': 1.0, '{'block_confi |         |
| (2, 6, 4, 12, 8 | 2       | 2     | 16          | reduced-foca | {'alpha': 1.0, '{'block_confi |         |
| (2, 6, 4, 12, 8 | 2       | 2     | 8           | reduced-foca | {'alpha': 1.0, '{'block_confi |         |
| (2, 6, 4, 12, 8 | 2       | 2     | 8           | reduced-foca | {'alpha': 1.0, '{'block_confi |         |
| (1, 3, 2, 6, 4) | 4       | 2     | 16          | reduced-foca | {'alpha': 1.0, '{'block_confi |         |
| (1, 3, 2, 6, 4) | 4       | 2     | 16          | reduced-foca | {'alpha': 1.0, '{'block_confi |         |
| (1, 3, 2, 6, 4) | 4       | 2     | 8           | reduced-foca | {'alpha': 1.0, '{'block_confi |         |
| (1, 3, 2, 6, 4) | 4       | 2     | 8           | reduced-foca | {'alpha': 1.0, '{'block_confi |         |
| (1, 3, 2, 6, 4) | 2       | 2     | 16          | reduced-foca | {'alpha': 1.0, '{'block_confi |         |
| (1, 3, 2, 6, 4) | 2       | 2     | 16          | reduced-foca | {'alpha': 1.0, '{'block_confi |         |
| (1, 3, 2, 6, 4) | 2       | 2     | 8           | reduced-foca | {'alpha': 1.0, '{'block_confi |         |
| (1, 3, 2, 6, 4) | 2       | 2     | 8           | reduced-foca | {'alpha': 1.0, '{'block_confi |         |
| (2, 6, 4, 12, 8 | 4       | 1     | 16          | reduced-foca | {'alpha': 1.0, '{'block_confi |         |
| (2, 6, 4, 12, 8 | 4       | 1     | 16          | reduced-foca | {'alpha': 1.0, '{'block_confi |         |
| (2, 6, 4, 12, 8 | 4       | 1     | 8           | reduced-foca | {'alpha': 1.0, '{'block_confi |         |
| (2, 6, 4, 12, 8 | 4       | 1     | 8           | reduced-foca | {'alpha': 1.0, '{'block_confi |         |
| (2, 6, 4, 12, 8 | 2       | 1     | 16          | reduced-foca | {'alpha': 1.0, '{'block_confi |         |
| (2, 6, 4, 12, 8 | 2       | 1     | 16          | reduced-foca | {'alpha': 1.0, '{'block_confi |         |
| (2, 6, 4, 12, 8 | 2       | 1     | 8           | reduced-foca | {'alpha': 1.0, '{'block_confi |         |
| (2, 6, 4, 12, 8 | 2       | 1     | 8           | reduced-foca | {'alpha': 1.0, '{'block_confi |         |
| (1, 3, 2, 6, 4) | 4       | 1     | 16          | reduced-foca | {'alpha': 1.0, '{'block_confi |         |
| (1, 3, 2, 6, 4) | 4       | 1     | 16          | reduced-foca | {'alpha': 1.0, '{'block_confi |         |
| (1, 3, 2, 6, 4) | 4       | 1     | 8           | reduced-foca | {'alpha': 1.0, '{'block_confi |         |
| (1, 3, 2, 6, 4) | 4       | 1     | 8           | reduced-foca | {'alpha': 1.0, '{'block_confi |         |
| (1, 3, 2, 6, 4) | 2       | 1     | 16          | reduced-foca | {'alpha': 1.0, '{'block_confi |         |
| (1, 3, 2, 6, 4) | 2       | 1     | 16          | reduced-foca | {'alpha': 1.0, '{'block_confi |         |
| (1, 3, 2, 6, 4) | 2       | 1     | 8           | reduced-foca | {'alpha': 1.0, '{'block_confi |         |
| (1, 3, 2, 6, 4) | 2       | 1     | 8           | reduced-foca | {'alpha': 1.0, '{'block_confi |         |
| (2, 6, 4, 12, 8 | 4       | 0.5   | 16          | reduced-foca | {'alpha': 1.0, '{'block_confi |         |
| (2, 6, 4, 12, 8 | 4       | 0.5   | 16          | reduced-foca | {'alpha': 1.0, '{'block_confi |         |
| (2, 6, 4, 12, 8 | 4       | 0.5   | 8           | reduced-foca | {'alpha': 1.0, '{'block_confi |         |
| (2, 6, 4, 12, 8 | 4       | 0.5   | 8           | reduced-foca | {'alpha': 1.0, '{'block_confi |         |
| (2, 6, 4, 12, 8 | 2       | 0.5   | 16          | reduced-foca | {'alpha': 1.0, '{'block_confi |         |
| (2, 6, 4, 12, 8 | 2       | 0.5   | 16          | reduced-foca | {'alpha': 1.0, '{'block_confi |         |
| (2, 6, 4, 12, 8 | 2       | 0.5   | 8           | reduced-foca | {'alpha': 1.0, '{'block_confi |         |
| (2, 6, 4, 12, 8 | 2       | 0.5   | 8           | reduced-foca | {'alpha': 1.0, '{'block_confi |         |

|                  |   |     |    |                                           |
|------------------|---|-----|----|-------------------------------------------|
| (1, 3, 2, 6, 4)  | 4 | 0.5 | 16 | reduced-foca {'alpha': 1.0, '{'block_conf |
| (1, 3, 2, 6, 4)  | 4 | 0.5 | 16 | reduced-foca {'alpha': 1.0, '{'block_conf |
| (1, 3, 2, 6, 4)  | 4 | 0.5 | 8  | reduced-foca {'alpha': 1.0, '{'block_conf |
| (1, 3, 2, 6, 4)  | 4 | 0.5 | 8  | reduced-foca {'alpha': 1.0, '{'block_conf |
| (1, 3, 2, 6, 4)  | 2 | 0.5 | 16 | reduced-foca {'alpha': 1.0, '{'block_conf |
| (1, 3, 2, 6, 4)  | 2 | 0.5 | 16 | reduced-foca {'alpha': 1.0, '{'block_conf |
| (1, 3, 2, 6, 4)  | 2 | 0.5 | 8  | reduced-foca {'alpha': 1.0, '{'block_conf |
| (1, 3, 2, 6, 4)  | 2 | 0.5 | 8  | reduced-foca {'alpha': 1.0, '{'block_conf |
| (2, 6, 4, 12, 8) | 4 | 2   | 16 | reduced-foca {'alpha': 0.5, '{'block_conf |
| (2, 6, 4, 12, 8) | 4 | 2   | 16 | reduced-foca {'alpha': 0.5, '{'block_conf |
| (2, 6, 4, 12, 8) | 4 | 2   | 8  | reduced-foca {'alpha': 0.5, '{'block_conf |
| (2, 6, 4, 12, 8) | 4 | 2   | 8  | reduced-foca {'alpha': 0.5, '{'block_conf |
| (2, 6, 4, 12, 8) | 2 | 2   | 16 | reduced-foca {'alpha': 0.5, '{'block_conf |
| (2, 6, 4, 12, 8) | 2 | 2   | 16 | reduced-foca {'alpha': 0.5, '{'block_conf |
| (2, 6, 4, 12, 8) | 2 | 2   | 8  | reduced-foca {'alpha': 0.5, '{'block_conf |
| (2, 6, 4, 12, 8) | 2 | 2   | 8  | reduced-foca {'alpha': 0.5, '{'block_conf |
| (1, 3, 2, 6, 4)  | 4 | 2   | 16 | reduced-foca {'alpha': 0.5, '{'block_conf |
| (1, 3, 2, 6, 4)  | 4 | 2   | 16 | reduced-foca {'alpha': 0.5, '{'block_conf |
| (1, 3, 2, 6, 4)  | 4 | 2   | 8  | reduced-foca {'alpha': 0.5, '{'block_conf |
| (1, 3, 2, 6, 4)  | 4 | 2   | 8  | reduced-foca {'alpha': 0.5, '{'block_conf |
| (1, 3, 2, 6, 4)  | 2 | 2   | 16 | reduced-foca {'alpha': 0.5, '{'block_conf |
| (1, 3, 2, 6, 4)  | 2 | 2   | 16 | reduced-foca {'alpha': 0.5, '{'block_conf |
| (1, 3, 2, 6, 4)  | 2 | 2   | 8  | reduced-foca {'alpha': 0.5, '{'block_conf |
| (1, 3, 2, 6, 4)  | 2 | 2   | 8  | reduced-foca {'alpha': 0.5, '{'block_conf |
| (2, 6, 4, 12, 8) | 4 | 1   | 16 | reduced-foca {'alpha': 0.5, '{'block_conf |
| (2, 6, 4, 12, 8) | 4 | 1   | 16 | reduced-foca {'alpha': 0.5, '{'block_conf |
| (2, 6, 4, 12, 8) | 4 | 1   | 8  | reduced-foca {'alpha': 0.5, '{'block_conf |
| (2, 6, 4, 12, 8) | 4 | 1   | 8  | reduced-foca {'alpha': 0.5, '{'block_conf |
| (2, 6, 4, 12, 8) | 2 | 1   | 16 | reduced-foca {'alpha': 0.5, '{'block_conf |
| (2, 6, 4, 12, 8) | 2 | 1   | 16 | reduced-foca {'alpha': 0.5, '{'block_conf |
| (2, 6, 4, 12, 8) | 2 | 1   | 8  | reduced-foca {'alpha': 0.5, '{'block_conf |
| (2, 6, 4, 12, 8) | 2 | 1   | 8  | reduced-foca {'alpha': 0.5, '{'block_conf |
| (1, 3, 2, 6, 4)  | 4 | 1   | 16 | reduced-foca {'alpha': 0.5, '{'block_conf |
| (1, 3, 2, 6, 4)  | 4 | 1   | 16 | reduced-foca {'alpha': 0.5, '{'block_conf |
| (1, 3, 2, 6, 4)  | 4 | 1   | 8  | reduced-foca {'alpha': 0.5, '{'block_conf |
| (1, 3, 2, 6, 4)  | 4 | 1   | 8  | reduced-foca {'alpha': 0.5, '{'block_conf |
| (1, 3, 2, 6, 4)  | 2 | 1   | 16 | reduced-foca {'alpha': 0.5, '{'block_conf |
| (1, 3, 2, 6, 4)  | 2 | 1   | 16 | reduced-foca {'alpha': 0.5, '{'block_conf |
| (1, 3, 2, 6, 4)  | 2 | 1   | 8  | reduced-foca {'alpha': 0.5, '{'block_conf |
| (1, 3, 2, 6, 4)  | 2 | 1   | 8  | reduced-foca {'alpha': 0.5, '{'block_conf |
| (2, 6, 4, 12, 8) | 4 | 0.5 | 16 | reduced-foca {'alpha': 0.5, '{'block_conf |

|                 |   |     |    |                                          |
|-----------------|---|-----|----|------------------------------------------|
| (2, 6, 4, 12, 8 | 4 | 0.5 | 16 | reduced-foca {'alpha': 0.5, {'block_conf |
| (2, 6, 4, 12, 8 | 4 | 0.5 | 8  | reduced-foca {'alpha': 0.5, {'block_conf |
| (2, 6, 4, 12, 8 | 4 | 0.5 | 8  | reduced-foca {'alpha': 0.5, {'block_conf |
| (2, 6, 4, 12, 8 | 2 | 0.5 | 16 | reduced-foca {'alpha': 0.5, {'block_conf |
| (2, 6, 4, 12, 8 | 2 | 0.5 | 16 | reduced-foca {'alpha': 0.5, {'block_conf |
| (2, 6, 4, 12, 8 | 2 | 0.5 | 8  | reduced-foca {'alpha': 0.5, {'block_conf |
| (2, 6, 4, 12, 8 | 2 | 0.5 | 8  | reduced-foca {'alpha': 0.5, {'block_conf |
| (1, 3, 2, 6, 4) | 4 | 0.5 | 16 | reduced-foca {'alpha': 0.5, {'block_conf |
| (1, 3, 2, 6, 4) | 4 | 0.5 | 16 | reduced-foca {'alpha': 0.5, {'block_conf |
| (1, 3, 2, 6, 4) | 4 | 0.5 | 8  | reduced-foca {'alpha': 0.5, {'block_conf |
| (1, 3, 2, 6, 4) | 4 | 0.5 | 8  | reduced-foca {'alpha': 0.5, {'block_conf |
| (1, 3, 2, 6, 4) | 2 | 0.5 | 16 | reduced-foca {'alpha': 0.5, {'block_conf |
| (1, 3, 2, 6, 4) | 2 | 0.5 | 16 | reduced-foca {'alpha': 0.5, {'block_conf |
| (1, 3, 2, 6, 4) | 2 | 0.5 | 8  | reduced-foca {'alpha': 0.5, {'block_conf |
| (1, 3, 2, 6, 4) | 2 | 0.5 | 8  | reduced-foca {'alpha': 0.5, {'block_conf |
| (2, 6, 4, 12, 8 | 4 | 2   | 16 | reduced-foca {'alpha': 0.25 {'block_conf |
| (2, 6, 4, 12, 8 | 4 | 2   | 16 | reduced-foca {'alpha': 0.25 {'block_conf |
| (2, 6, 4, 12, 8 | 4 | 2   | 8  | reduced-foca {'alpha': 0.25 {'block_conf |
| (2, 6, 4, 12, 8 | 4 | 2   | 8  | reduced-foca {'alpha': 0.25 {'block_conf |
| (2, 6, 4, 12, 8 | 2 | 2   | 16 | reduced-foca {'alpha': 0.25 {'block_conf |
| (2, 6, 4, 12, 8 | 2 | 2   | 16 | reduced-foca {'alpha': 0.25 {'block_conf |
| (2, 6, 4, 12, 8 | 2 | 2   | 8  | reduced-foca {'alpha': 0.25 {'block_conf |
| (2, 6, 4, 12, 8 | 2 | 2   | 8  | reduced-foca {'alpha': 0.25 {'block_conf |
| (1, 3, 2, 6, 4) | 4 | 2   | 16 | reduced-foca {'alpha': 0.25 {'block_conf |
| (1, 3, 2, 6, 4) | 4 | 2   | 16 | reduced-foca {'alpha': 0.25 {'block_conf |
| (1, 3, 2, 6, 4) | 4 | 2   | 8  | reduced-foca {'alpha': 0.25 {'block_conf |
| (1, 3, 2, 6, 4) | 4 | 2   | 8  | reduced-foca {'alpha': 0.25 {'block_conf |
| (1, 3, 2, 6, 4) | 2 | 2   | 16 | reduced-foca {'alpha': 0.25 {'block_conf |
| (1, 3, 2, 6, 4) | 2 | 2   | 16 | reduced-foca {'alpha': 0.25 {'block_conf |
| (1, 3, 2, 6, 4) | 2 | 2   | 8  | reduced-foca {'alpha': 0.25 {'block_conf |
| (1, 3, 2, 6, 4) | 2 | 2   | 8  | reduced-foca {'alpha': 0.25 {'block_conf |
| (2, 6, 4, 12, 8 | 4 | 1   | 16 | reduced-foca {'alpha': 0.25 {'block_conf |
| (2, 6, 4, 12, 8 | 4 | 1   | 16 | reduced-foca {'alpha': 0.25 {'block_conf |
| (2, 6, 4, 12, 8 | 4 | 1   | 8  | reduced-foca {'alpha': 0.25 {'block_conf |
| (2, 6, 4, 12, 8 | 4 | 1   | 8  | reduced-foca {'alpha': 0.25 {'block_conf |
| (2, 6, 4, 12, 8 | 2 | 1   | 16 | reduced-foca {'alpha': 0.25 {'block_conf |
| (2, 6, 4, 12, 8 | 2 | 1   | 16 | reduced-foca {'alpha': 0.25 {'block_conf |
| (2, 6, 4, 12, 8 | 2 | 1   | 8  | reduced-foca {'alpha': 0.25 {'block_conf |
| (2, 6, 4, 12, 8 | 2 | 1   | 8  | reduced-foca {'alpha': 0.25 {'block_conf |
| (1, 3, 2, 6, 4) | 4 | 1   | 16 | reduced-foca {'alpha': 0.25 {'block_conf |
| (1, 3, 2, 6, 4) | 4 | 1   | 16 | reduced-foca {'alpha': 0.25 {'block_conf |

|                  |   |     |    |              |                             |
|------------------|---|-----|----|--------------|-----------------------------|
| (1, 3, 2, 6, 4)  | 4 | 1   | 8  | reduced-foca | {'alpha': 0.25 {'block_conf |
| (1, 3, 2, 6, 4)  | 4 | 1   | 8  | reduced-foca | {'alpha': 0.25 {'block_conf |
| (1, 3, 2, 6, 4)  | 2 | 1   | 16 | reduced-foca | {'alpha': 0.25 {'block_conf |
| (1, 3, 2, 6, 4)  | 2 | 1   | 16 | reduced-foca | {'alpha': 0.25 {'block_conf |
| (1, 3, 2, 6, 4)  | 2 | 1   | 8  | reduced-foca | {'alpha': 0.25 {'block_conf |
| (1, 3, 2, 6, 4)  | 2 | 1   | 8  | reduced-foca | {'alpha': 0.25 {'block_conf |
| (2, 6, 4, 12, 8) | 4 | 0.5 | 16 | reduced-foca | {'alpha': 0.25 {'block_conf |
| (2, 6, 4, 12, 8) | 4 | 0.5 | 16 | reduced-foca | {'alpha': 0.25 {'block_conf |
| (2, 6, 4, 12, 8) | 4 | 0.5 | 8  | reduced-foca | {'alpha': 0.25 {'block_conf |
| (2, 6, 4, 12, 8) | 4 | 0.5 | 8  | reduced-foca | {'alpha': 0.25 {'block_conf |
| (2, 6, 4, 12, 8) | 2 | 0.5 | 16 | reduced-foca | {'alpha': 0.25 {'block_conf |
| (2, 6, 4, 12, 8) | 2 | 0.5 | 16 | reduced-foca | {'alpha': 0.25 {'block_conf |
| (2, 6, 4, 12, 8) | 2 | 0.5 | 8  | reduced-foca | {'alpha': 0.25 {'block_conf |
| (2, 6, 4, 12, 8) | 2 | 0.5 | 8  | reduced-foca | {'alpha': 0.25 {'block_conf |
| (1, 3, 2, 6, 4)  | 4 | 0.5 | 16 | reduced-foca | {'alpha': 0.25 {'block_conf |
| (1, 3, 2, 6, 4)  | 4 | 0.5 | 16 | reduced-foca | {'alpha': 0.25 {'block_conf |
| (1, 3, 2, 6, 4)  | 4 | 0.5 | 8  | reduced-foca | {'alpha': 0.25 {'block_conf |
| (1, 3, 2, 6, 4)  | 4 | 0.5 | 8  | reduced-foca | {'alpha': 0.25 {'block_conf |
| (1, 3, 2, 6, 4)  | 2 | 0.5 | 16 | reduced-foca | {'alpha': 0.25 {'block_conf |
| (1, 3, 2, 6, 4)  | 2 | 0.5 | 16 | reduced-foca | {'alpha': 0.25 {'block_conf |
| (1, 3, 2, 6, 4)  | 2 | 0.5 | 8  | reduced-foca | {'alpha': 0.25 {'block_conf |
| (1, 3, 2, 6, 4)  | 2 | 0.5 | 8  | reduced-foca | {'alpha': 0.25 {'block_conf |
| (2, 6, 4, 12, 8) | 4 | 2   | 16 | focal        | {'alpha': 1.0, {'block_conf |
| (2, 6, 4, 12, 8) | 4 | 2   | 16 | focal        | {'alpha': 1.0, {'block_conf |
| (2, 6, 4, 12, 8) | 4 | 2   | 8  | focal        | {'alpha': 1.0, {'block_conf |
| (2, 6, 4, 12, 8) | 4 | 2   | 8  | focal        | {'alpha': 1.0, {'block_conf |
| (2, 6, 4, 12, 8) | 2 | 2   | 16 | focal        | {'alpha': 1.0, {'block_conf |
| (2, 6, 4, 12, 8) | 2 | 2   | 16 | focal        | {'alpha': 1.0, {'block_conf |
| (2, 6, 4, 12, 8) | 2 | 2   | 8  | focal        | {'alpha': 1.0, {'block_conf |
| (2, 6, 4, 12, 8) | 2 | 2   | 8  | focal        | {'alpha': 1.0, {'block_conf |
| (1, 3, 2, 6, 4)  | 4 | 2   | 16 | focal        | {'alpha': 1.0, {'block_conf |
| (1, 3, 2, 6, 4)  | 4 | 2   | 16 | focal        | {'alpha': 1.0, {'block_conf |
| (1, 3, 2, 6, 4)  | 4 | 2   | 8  | focal        | {'alpha': 1.0, {'block_conf |
| (1, 3, 2, 6, 4)  | 4 | 2   | 8  | focal        | {'alpha': 1.0, {'block_conf |
| (1, 3, 2, 6, 4)  | 2 | 2   | 16 | focal        | {'alpha': 1.0, {'block_conf |
| (1, 3, 2, 6, 4)  | 2 | 2   | 16 | focal        | {'alpha': 1.0, {'block_conf |
| (1, 3, 2, 6, 4)  | 2 | 2   | 8  | focal        | {'alpha': 1.0, {'block_conf |
| (1, 3, 2, 6, 4)  | 2 | 2   | 8  | focal        | {'alpha': 1.0, {'block_conf |
| (2, 6, 4, 12, 8) | 4 | 1   | 16 | focal        | {'alpha': 1.0, {'block_conf |
| (2, 6, 4, 12, 8) | 4 | 1   | 16 | focal        | {'alpha': 1.0, {'block_conf |
| (2, 6, 4, 12, 8) | 4 | 1   | 8  | focal        | {'alpha': 1.0, {'block_conf |

|                 |   |     |    |       |                             |
|-----------------|---|-----|----|-------|-----------------------------|
| (2, 6, 4, 12, 8 | 4 | 1   | 8  | focal | {'alpha': 1.0, {'block_conf |
| (2, 6, 4, 12, 8 | 2 | 1   | 16 | focal | {'alpha': 1.0, {'block_conf |
| (2, 6, 4, 12, 8 | 2 | 1   | 16 | focal | {'alpha': 1.0, {'block_conf |
| (2, 6, 4, 12, 8 | 2 | 1   | 8  | focal | {'alpha': 1.0, {'block_conf |
| (2, 6, 4, 12, 8 | 2 | 1   | 8  | focal | {'alpha': 1.0, {'block_conf |
| (1, 3, 2, 6, 4) | 4 | 1   | 16 | focal | {'alpha': 1.0, {'block_conf |
| (1, 3, 2, 6, 4) | 4 | 1   | 16 | focal | {'alpha': 1.0, {'block_conf |
| (1, 3, 2, 6, 4) | 4 | 1   | 8  | focal | {'alpha': 1.0, {'block_conf |
| (1, 3, 2, 6, 4) | 4 | 1   | 8  | focal | {'alpha': 1.0, {'block_conf |
| (1, 3, 2, 6, 4) | 2 | 1   | 16 | focal | {'alpha': 1.0, {'block_conf |
| (1, 3, 2, 6, 4) | 2 | 1   | 16 | focal | {'alpha': 1.0, {'block_conf |
| (1, 3, 2, 6, 4) | 2 | 1   | 8  | focal | {'alpha': 1.0, {'block_conf |
| (1, 3, 2, 6, 4) | 2 | 1   | 8  | focal | {'alpha': 1.0, {'block_conf |
| (2, 6, 4, 12, 8 | 4 | 0.5 | 16 | focal | {'alpha': 1.0, {'block_conf |
| (2, 6, 4, 12, 8 | 4 | 0.5 | 16 | focal | {'alpha': 1.0, {'block_conf |
| (2, 6, 4, 12, 8 | 4 | 0.5 | 8  | focal | {'alpha': 1.0, {'block_conf |
| (2, 6, 4, 12, 8 | 4 | 0.5 | 8  | focal | {'alpha': 1.0, {'block_conf |
| (2, 6, 4, 12, 8 | 2 | 0.5 | 16 | focal | {'alpha': 1.0, {'block_conf |
| (2, 6, 4, 12, 8 | 2 | 0.5 | 16 | focal | {'alpha': 1.0, {'block_conf |
| (2, 6, 4, 12, 8 | 2 | 0.5 | 8  | focal | {'alpha': 1.0, {'block_conf |
| (2, 6, 4, 12, 8 | 2 | 0.5 | 8  | focal | {'alpha': 1.0, {'block_conf |
| (1, 3, 2, 6, 4) | 4 | 0.5 | 16 | focal | {'alpha': 1.0, {'block_conf |
| (1, 3, 2, 6, 4) | 4 | 0.5 | 16 | focal | {'alpha': 1.0, {'block_conf |
| (1, 3, 2, 6, 4) | 4 | 0.5 | 8  | focal | {'alpha': 1.0, {'block_conf |
| (1, 3, 2, 6, 4) | 4 | 0.5 | 8  | focal | {'alpha': 1.0, {'block_conf |
| (1, 3, 2, 6, 4) | 2 | 0.5 | 16 | focal | {'alpha': 1.0, {'block_conf |
| (1, 3, 2, 6, 4) | 2 | 0.5 | 16 | focal | {'alpha': 1.0, {'block_conf |
| (1, 3, 2, 6, 4) | 2 | 0.5 | 8  | focal | {'alpha': 1.0, {'block_conf |
| (1, 3, 2, 6, 4) | 2 | 0.5 | 8  | focal | {'alpha': 1.0, {'block_conf |
| (2, 6, 4, 12, 8 | 4 | 2   | 16 | focal | {'alpha': 0.5, {'block_conf |
| (2, 6, 4, 12, 8 | 4 | 2   | 16 | focal | {'alpha': 0.5, {'block_conf |
| (2, 6, 4, 12, 8 | 4 | 2   | 8  | focal | {'alpha': 0.5, {'block_conf |
| (2, 6, 4, 12, 8 | 4 | 2   | 8  | focal | {'alpha': 0.5, {'block_conf |
| (2, 6, 4, 12, 8 | 2 | 2   | 16 | focal | {'alpha': 0.5, {'block_conf |
| (2, 6, 4, 12, 8 | 2 | 2   | 16 | focal | {'alpha': 0.5, {'block_conf |
| (2, 6, 4, 12, 8 | 2 | 2   | 8  | focal | {'alpha': 0.5, {'block_conf |
| (2, 6, 4, 12, 8 | 2 | 2   | 8  | focal | {'alpha': 0.5, {'block_conf |
| (1, 3, 2, 6, 4) | 4 | 2   | 16 | focal | {'alpha': 0.5, {'block_conf |
| (1, 3, 2, 6, 4) | 4 | 2   | 16 | focal | {'alpha': 0.5, {'block_conf |
| (1, 3, 2, 6, 4) | 4 | 2   | 8  | focal | {'alpha': 0.5, {'block_conf |
| (1, 3, 2, 6, 4) | 4 | 2   | 8  | focal | {'alpha': 0.5, {'block_conf |



|                  |   |     |    |       |                             |
|------------------|---|-----|----|-------|-----------------------------|
| (1, 3, 2, 6, 4)  | 2 | 2   | 16 | focal | {'alpha': 0.5, {'block_conf |
| (1, 3, 2, 6, 4)  | 2 | 2   | 16 | focal | {'alpha': 0.5, {'block_conf |
| (1, 3, 2, 6, 4)  | 2 | 2   | 8  | focal | {'alpha': 0.5, {'block_conf |
| (1, 3, 2, 6, 4)  | 2 | 2   | 8  | focal | {'alpha': 0.5, {'block_conf |
| (2, 6, 4, 12, 8) | 4 | 1   | 16 | focal | {'alpha': 0.5, {'block_conf |
| (2, 6, 4, 12, 8) | 4 | 1   | 16 | focal | {'alpha': 0.5, {'block_conf |
| (2, 6, 4, 12, 8) | 4 | 1   | 8  | focal | {'alpha': 0.5, {'block_conf |
| (2, 6, 4, 12, 8) | 4 | 1   | 8  | focal | {'alpha': 0.5, {'block_conf |
| (2, 6, 4, 12, 8) | 2 | 1   | 16 | focal | {'alpha': 0.5, {'block_conf |
| (2, 6, 4, 12, 8) | 2 | 1   | 16 | focal | {'alpha': 0.5, {'block_conf |
| (2, 6, 4, 12, 8) | 2 | 1   | 8  | focal | {'alpha': 0.5, {'block_conf |
| (2, 6, 4, 12, 8) | 2 | 1   | 8  | focal | {'alpha': 0.5, {'block_conf |
| (1, 3, 2, 6, 4)  | 4 | 1   | 16 | focal | {'alpha': 0.5, {'block_conf |
| (1, 3, 2, 6, 4)  | 4 | 1   | 16 | focal | {'alpha': 0.5, {'block_conf |
| (1, 3, 2, 6, 4)  | 4 | 1   | 8  | focal | {'alpha': 0.5, {'block_conf |
| (1, 3, 2, 6, 4)  | 4 | 1   | 8  | focal | {'alpha': 0.5, {'block_conf |
| (1, 3, 2, 6, 4)  | 2 | 1   | 16 | focal | {'alpha': 0.5, {'block_conf |
| (1, 3, 2, 6, 4)  | 2 | 1   | 16 | focal | {'alpha': 0.5, {'block_conf |
| (1, 3, 2, 6, 4)  | 2 | 1   | 8  | focal | {'alpha': 0.5, {'block_conf |
| (1, 3, 2, 6, 4)  | 2 | 1   | 8  | focal | {'alpha': 0.5, {'block_conf |
| (2, 6, 4, 12, 8) | 4 | 0.5 | 16 | focal | {'alpha': 0.5, {'block_conf |
| (2, 6, 4, 12, 8) | 4 | 0.5 | 16 | focal | {'alpha': 0.5, {'block_conf |
| (2, 6, 4, 12, 8) | 4 | 0.5 | 8  | focal | {'alpha': 0.5, {'block_conf |
| (2, 6, 4, 12, 8) | 4 | 0.5 | 8  | focal | {'alpha': 0.5, {'block_conf |
| (2, 6, 4, 12, 8) | 2 | 0.5 | 16 | focal | {'alpha': 0.5, {'block_conf |
| (2, 6, 4, 12, 8) | 2 | 0.5 | 16 | focal | {'alpha': 0.5, {'block_conf |
| (2, 6, 4, 12, 8) | 2 | 0.5 | 8  | focal | {'alpha': 0.5, {'block_conf |
| (2, 6, 4, 12, 8) | 2 | 0.5 | 8  | focal | {'alpha': 0.5, {'block_conf |
| (1, 3, 2, 6, 4)  | 4 | 0.5 | 16 | focal | {'alpha': 0.5, {'block_conf |
| (1, 3, 2, 6, 4)  | 4 | 0.5 | 16 | focal | {'alpha': 0.5, {'block_conf |
| (1, 3, 2, 6, 4)  | 4 | 0.5 | 8  | focal | {'alpha': 0.5, {'block_conf |
| (1, 3, 2, 6, 4)  | 4 | 0.5 | 8  | focal | {'alpha': 0.5, {'block_conf |
| (1, 3, 2, 6, 4)  | 2 | 0.5 | 16 | focal | {'alpha': 0.5, {'block_conf |
| (1, 3, 2, 6, 4)  | 2 | 0.5 | 16 | focal | {'alpha': 0.5, {'block_conf |
| (1, 3, 2, 6, 4)  | 2 | 0.5 | 8  | focal | {'alpha': 0.5, {'block_conf |
| (1, 3, 2, 6, 4)  | 2 | 0.5 | 8  | focal | {'alpha': 0.5, {'block_conf |
| (2, 6, 4, 12, 8) | 4 | 2   | 16 | focal | {'alpha': 0.25 {'block_conf |
| (2, 6, 4, 12, 8) | 4 | 2   | 16 | focal | {'alpha': 0.25 {'block_conf |
| (2, 6, 4, 12, 8) | 4 | 2   | 8  | focal | {'alpha': 0.25 {'block_conf |
| (2, 6, 4, 12, 8) | 4 | 2   | 8  | focal | {'alpha': 0.25 {'block_conf |
| (2, 6, 4, 12, 8) | 2 | 2   | 16 | focal | {'alpha': 0.25 {'block_conf |

|                 |   |     |    |       |                             |
|-----------------|---|-----|----|-------|-----------------------------|
| (2, 6, 4, 12, 8 | 2 | 2   | 16 | focal | {'alpha': 0.25 {'block_conf |
| (2, 6, 4, 12, 8 | 2 | 2   | 8  | focal | {'alpha': 0.25 {'block_conf |
| (2, 6, 4, 12, 8 | 2 | 2   | 8  | focal | {'alpha': 0.25 {'block_conf |
| (1, 3, 2, 6, 4) | 4 | 2   | 16 | focal | {'alpha': 0.25 {'block_conf |
| (1, 3, 2, 6, 4) | 4 | 2   | 16 | focal | {'alpha': 0.25 {'block_conf |
| (1, 3, 2, 6, 4) | 4 | 2   | 8  | focal | {'alpha': 0.25 {'block_conf |
| (1, 3, 2, 6, 4) | 4 | 2   | 8  | focal | {'alpha': 0.25 {'block_conf |
| (1, 3, 2, 6, 4) | 2 | 2   | 16 | focal | {'alpha': 0.25 {'block_conf |
| (1, 3, 2, 6, 4) | 2 | 2   | 16 | focal | {'alpha': 0.25 {'block_conf |
| (1, 3, 2, 6, 4) | 2 | 2   | 8  | focal | {'alpha': 0.25 {'block_conf |
| (1, 3, 2, 6, 4) | 2 | 2   | 8  | focal | {'alpha': 0.25 {'block_conf |
| (2, 6, 4, 12, 8 | 4 | 1   | 16 | focal | {'alpha': 0.25 {'block_conf |
| (2, 6, 4, 12, 8 | 4 | 1   | 16 | focal | {'alpha': 0.25 {'block_conf |
| (2, 6, 4, 12, 8 | 4 | 1   | 8  | focal | {'alpha': 0.25 {'block_conf |
| (2, 6, 4, 12, 8 | 4 | 1   | 8  | focal | {'alpha': 0.25 {'block_conf |
| (2, 6, 4, 12, 8 | 2 | 1   | 16 | focal | {'alpha': 0.25 {'block_conf |
| (2, 6, 4, 12, 8 | 2 | 1   | 16 | focal | {'alpha': 0.25 {'block_conf |
| (2, 6, 4, 12, 8 | 2 | 1   | 8  | focal | {'alpha': 0.25 {'block_conf |
| (2, 6, 4, 12, 8 | 2 | 1   | 8  | focal | {'alpha': 0.25 {'block_conf |
| (1, 3, 2, 6, 4) | 4 | 1   | 16 | focal | {'alpha': 0.25 {'block_conf |
| (1, 3, 2, 6, 4) | 4 | 1   | 16 | focal | {'alpha': 0.25 {'block_conf |
| (1, 3, 2, 6, 4) | 4 | 1   | 8  | focal | {'alpha': 0.25 {'block_conf |
| (1, 3, 2, 6, 4) | 4 | 1   | 8  | focal | {'alpha': 0.25 {'block_conf |
| (1, 3, 2, 6, 4) | 2 | 1   | 16 | focal | {'alpha': 0.25 {'block_conf |
| (1, 3, 2, 6, 4) | 2 | 1   | 16 | focal | {'alpha': 0.25 {'block_conf |
| (1, 3, 2, 6, 4) | 2 | 1   | 8  | focal | {'alpha': 0.25 {'block_conf |
| (1, 3, 2, 6, 4) | 2 | 1   | 8  | focal | {'alpha': 0.25 {'block_conf |
| (2, 6, 4, 12, 8 | 4 | 0.5 | 16 | focal | {'alpha': 0.25 {'block_conf |
| (2, 6, 4, 12, 8 | 4 | 0.5 | 16 | focal | {'alpha': 0.25 {'block_conf |
| (2, 6, 4, 12, 8 | 4 | 0.5 | 8  | focal | {'alpha': 0.25 {'block_conf |
| (2, 6, 4, 12, 8 | 4 | 0.5 | 8  | focal | {'alpha': 0.25 {'block_conf |
| (2, 6, 4, 12, 8 | 2 | 0.5 | 16 | focal | {'alpha': 0.25 {'block_conf |
| (2, 6, 4, 12, 8 | 2 | 0.5 | 16 | focal | {'alpha': 0.25 {'block_conf |
| (2, 6, 4, 12, 8 | 2 | 0.5 | 8  | focal | {'alpha': 0.25 {'block_conf |
| (2, 6, 4, 12, 8 | 2 | 0.5 | 8  | focal | {'alpha': 0.25 {'block_conf |
| (1, 3, 2, 6, 4) | 4 | 0.5 | 16 | focal | {'alpha': 0.25 {'block_conf |
| (1, 3, 2, 6, 4) | 4 | 0.5 | 16 | focal | {'alpha': 0.25 {'block_conf |
| (1, 3, 2, 6, 4) | 4 | 0.5 | 8  | focal | {'alpha': 0.25 {'block_conf |
| (1, 3, 2, 6, 4) | 4 | 0.5 | 8  | focal | {'alpha': 0.25 {'block_conf |
| (1, 3, 2, 6, 4) | 2 | 0.5 | 16 | focal | {'alpha': 0.25 {'block_conf |
| (1, 3, 2, 6, 4) | 2 | 0.5 | 16 | focal | {'alpha': 0.25 {'block_conf |

|                  |   |     |    |             |                             |
|------------------|---|-----|----|-------------|-----------------------------|
| (1, 3, 2, 6, 4)  | 2 | 0.5 | 8  | focal       | {'alpha': 0.25 {'block_conf |
| (1, 3, 2, 6, 4)  | 2 | 0.5 | 8  | focal       | {'alpha': 0.25 {'block_conf |
| (2, 6, 4, 12, 8) | 4 |     | 16 | weighted-CE | {'alpha': 1.0, {'block_conf |
| (2, 6, 4, 12, 8) | 4 |     | 16 | weighted-CE | {'alpha': 1.0, {'block_conf |
| (2, 6, 4, 12, 8) | 4 |     | 8  | weighted-CE | {'alpha': 1.0, {'block_conf |
| (2, 6, 4, 12, 8) | 4 |     | 8  | weighted-CE | {'alpha': 1.0, {'block_conf |
| (2, 6, 4, 12, 8) | 2 |     | 16 | weighted-CE | {'alpha': 1.0, {'block_conf |
| (2, 6, 4, 12, 8) | 2 |     | 16 | weighted-CE | {'alpha': 1.0, {'block_conf |
| (2, 6, 4, 12, 8) | 2 |     | 8  | weighted-CE | {'alpha': 1.0, {'block_conf |
| (2, 6, 4, 12, 8) | 2 |     | 8  | weighted-CE | {'alpha': 1.0, {'block_conf |
| (1, 3, 2, 6, 4)  | 4 |     | 16 | weighted-CE | {'alpha': 1.0, {'block_conf |
| (1, 3, 2, 6, 4)  | 4 |     | 16 | weighted-CE | {'alpha': 1.0, {'block_conf |
| (1, 3, 2, 6, 4)  | 4 |     | 8  | weighted-CE | {'alpha': 1.0, {'block_conf |
| (1, 3, 2, 6, 4)  | 4 |     | 8  | weighted-CE | {'alpha': 1.0, {'block_conf |
| (1, 3, 2, 6, 4)  | 2 |     | 16 | weighted-CE | {'alpha': 1.0, {'block_conf |
| (1, 3, 2, 6, 4)  | 2 |     | 16 | weighted-CE | {'alpha': 1.0, {'block_conf |
| (1, 3, 2, 6, 4)  | 2 |     | 8  | weighted-CE | {'alpha': 1.0, {'block_conf |
| (1, 3, 2, 6, 4)  | 2 |     | 8  | weighted-CE | {'alpha': 1.0, {'block_conf |
| (2, 6, 4, 12, 8) | 4 |     | 16 | CE          | {'alpha': 1.0, {'block_conf |
| (2, 6, 4, 12, 8) | 4 |     | 16 | CE          | {'alpha': 1.0, {'block_conf |
| (2, 6, 4, 12, 8) | 4 |     | 8  | CE          | {'alpha': 1.0, {'block_conf |
| (2, 6, 4, 12, 8) | 4 |     | 8  | CE          | {'alpha': 1.0, {'block_conf |
| (2, 6, 4, 12, 8) | 2 |     | 16 | CE          | {'alpha': 1.0, {'block_conf |
| (2, 6, 4, 12, 8) | 2 |     | 16 | CE          | {'alpha': 1.0, {'block_conf |
| (2, 6, 4, 12, 8) | 2 |     | 8  | CE          | {'alpha': 1.0, {'block_conf |
| (2, 6, 4, 12, 8) | 2 |     | 8  | CE          | {'alpha': 1.0, {'block_conf |
| (1, 3, 2, 6, 4)  | 4 |     | 16 | CE          | {'alpha': 1.0, {'block_conf |
| (1, 3, 2, 6, 4)  | 4 |     | 16 | CE          | {'alpha': 1.0, {'block_conf |
| (1, 3, 2, 6, 4)  | 4 |     | 8  | CE          | {'alpha': 1.0, {'block_conf |
| (1, 3, 2, 6, 4)  | 4 |     | 8  | CE          | {'alpha': 1.0, {'block_conf |
| (1, 3, 2, 6, 4)  | 2 |     | 16 | CE          | {'alpha': 1.0, {'block_conf |
| (1, 3, 2, 6, 4)  | 2 |     | 16 | CE          | {'alpha': 1.0, {'block_conf |
| (1, 3, 2, 6, 4)  | 2 |     | 8  | CE          | {'alpha': 1.0, {'block_conf |
| (1, 3, 2, 6, 4)  | 2 |     | 8  | CE          | {'alpha': 1.0, {'block_conf |
| (2, 6, 4, 12, 8) | 4 |     | 16 | weighted-CE | {'alpha': 0.5, {'block_conf |
| (2, 6, 4, 12, 8) | 4 |     | 16 | weighted-CE | {'alpha': 0.5, {'block_conf |
| (2, 6, 4, 12, 8) | 4 |     | 8  | weighted-CE | {'alpha': 0.5, {'block_conf |
| (2, 6, 4, 12, 8) | 4 |     | 8  | weighted-CE | {'alpha': 0.5, {'block_conf |
| (2, 6, 4, 12, 8) | 2 |     | 16 | weighted-CE | {'alpha': 0.5, {'block_conf |
| (2, 6, 4, 12, 8) | 2 |     | 16 | weighted-CE | {'alpha': 0.5, {'block_conf |
| (2, 6, 4, 12, 8) | 2 |     | 8  | weighted-CE | {'alpha': 0.5, {'block_conf |

|                  |   |    |                                          |
|------------------|---|----|------------------------------------------|
| (2, 6, 4, 12, 8) | 2 | 8  | weighted-CE {'alpha': 0.5, '{'block_conf |
| (1, 3, 2, 6, 4)  | 4 | 16 | weighted-CE {'alpha': 0.5, '{'block_conf |
| (1, 3, 2, 6, 4)  | 4 | 16 | weighted-CE {'alpha': 0.5, '{'block_conf |
| (1, 3, 2, 6, 4)  | 4 | 8  | weighted-CE {'alpha': 0.5, '{'block_conf |
| (1, 3, 2, 6, 4)  | 4 | 8  | weighted-CE {'alpha': 0.5, '{'block_conf |
| (1, 3, 2, 6, 4)  | 2 | 16 | weighted-CE {'alpha': 0.5, '{'block_conf |
| (1, 3, 2, 6, 4)  | 2 | 16 | weighted-CE {'alpha': 0.5, '{'block_conf |
| (1, 3, 2, 6, 4)  | 2 | 8  | weighted-CE {'alpha': 0.5, '{'block_conf |
| (1, 3, 2, 6, 4)  | 2 | 8  | weighted-CE {'alpha': 0.5, '{'block_conf |
| (2, 6, 4, 12, 8) | 4 | 16 | CE {'alpha': 0.5, '{'block_conf          |
| (2, 6, 4, 12, 8) | 4 | 16 | CE {'alpha': 0.5, '{'block_conf          |
| (2, 6, 4, 12, 8) | 4 | 8  | CE {'alpha': 0.5, '{'block_conf          |
| (2, 6, 4, 12, 8) | 4 | 8  | CE {'alpha': 0.5, '{'block_conf          |
| (2, 6, 4, 12, 8) | 2 | 16 | CE {'alpha': 0.5, '{'block_conf          |
| (2, 6, 4, 12, 8) | 2 | 16 | CE {'alpha': 0.5, '{'block_conf          |
| (2, 6, 4, 12, 8) | 2 | 8  | CE {'alpha': 0.5, '{'block_conf          |
| (2, 6, 4, 12, 8) | 2 | 8  | CE {'alpha': 0.5, '{'block_conf          |
| (1, 3, 2, 6, 4)  | 4 | 16 | CE {'alpha': 0.5, '{'block_conf          |
| (1, 3, 2, 6, 4)  | 4 | 16 | CE {'alpha': 0.5, '{'block_conf          |
| (1, 3, 2, 6, 4)  | 4 | 8  | CE {'alpha': 0.5, '{'block_conf          |
| (1, 3, 2, 6, 4)  | 4 | 8  | CE {'alpha': 0.5, '{'block_conf          |
| (1, 3, 2, 6, 4)  | 2 | 16 | CE {'alpha': 0.5, '{'block_conf          |
| (1, 3, 2, 6, 4)  | 2 | 16 | CE {'alpha': 0.5, '{'block_conf          |
| (1, 3, 2, 6, 4)  | 2 | 8  | CE {'alpha': 0.5, '{'block_conf          |
| (1, 3, 2, 6, 4)  | 2 | 8  | CE {'alpha': 0.5, '{'block_conf          |
| (2, 6, 4, 12, 8) | 4 | 16 | weighted-CE {'alpha': 0.25 '{'block_conf |
| (2, 6, 4, 12, 8) | 4 | 16 | weighted-CE {'alpha': 0.25 '{'block_conf |
| (2, 6, 4, 12, 8) | 4 | 8  | weighted-CE {'alpha': 0.25 '{'block_conf |
| (2, 6, 4, 12, 8) | 4 | 8  | weighted-CE {'alpha': 0.25 '{'block_conf |
| (2, 6, 4, 12, 8) | 2 | 16 | weighted-CE {'alpha': 0.25 '{'block_conf |
| (2, 6, 4, 12, 8) | 2 | 16 | weighted-CE {'alpha': 0.25 '{'block_conf |
| (2, 6, 4, 12, 8) | 2 | 8  | weighted-CE {'alpha': 0.25 '{'block_conf |
| (2, 6, 4, 12, 8) | 2 | 8  | weighted-CE {'alpha': 0.25 '{'block_conf |
| (1, 3, 2, 6, 4)  | 4 | 16 | weighted-CE {'alpha': 0.25 '{'block_conf |
| (1, 3, 2, 6, 4)  | 4 | 16 | weighted-CE {'alpha': 0.25 '{'block_conf |
| (1, 3, 2, 6, 4)  | 4 | 8  | weighted-CE {'alpha': 0.25 '{'block_conf |
| (1, 3, 2, 6, 4)  | 4 | 8  | weighted-CE {'alpha': 0.25 '{'block_conf |
| (1, 3, 2, 6, 4)  | 2 | 16 | weighted-CE {'alpha': 0.25 '{'block_conf |
| (1, 3, 2, 6, 4)  | 2 | 16 | weighted-CE {'alpha': 0.25 '{'block_conf |
| (1, 3, 2, 6, 4)  | 2 | 8  | weighted-CE {'alpha': 0.25 '{'block_conf |
| (1, 3, 2, 6, 4)  | 2 | 8  | weighted-CE {'alpha': 0.25 '{'block_conf |

|                 |   |   |    |              |                             |
|-----------------|---|---|----|--------------|-----------------------------|
| (2, 6, 4, 12, 8 | 4 |   | 16 | CE           | {'alpha': 0.25 {'block_conf |
| (2, 6, 4, 12, 8 | 4 |   | 16 | CE           | {'alpha': 0.25 {'block_conf |
| (2, 6, 4, 12, 8 | 4 |   | 8  | CE           | {'alpha': 0.25 {'block_conf |
| (2, 6, 4, 12, 8 | 4 |   | 8  | CE           | {'alpha': 0.25 {'block_conf |
| (2, 6, 4, 12, 8 | 2 |   | 16 | CE           | {'alpha': 0.25 {'block_conf |
| (2, 6, 4, 12, 8 | 2 |   | 16 | CE           | {'alpha': 0.25 {'block_conf |
| (2, 6, 4, 12, 8 | 2 |   | 8  | CE           | {'alpha': 0.25 {'block_conf |
| (2, 6, 4, 12, 8 | 2 |   | 8  | CE           | {'alpha': 0.25 {'block_conf |
| (1, 3, 2, 6, 4) | 4 |   | 16 | CE           | {'alpha': 0.25 {'block_conf |
| (1, 3, 2, 6, 4) | 4 |   | 16 | CE           | {'alpha': 0.25 {'block_conf |
| (1, 3, 2, 6, 4) | 4 |   | 8  | CE           | {'alpha': 0.25 {'block_conf |
| (1, 3, 2, 6, 4) | 4 |   | 8  | CE           | {'alpha': 0.25 {'block_conf |
| (1, 3, 2, 6, 4) | 2 |   | 16 | CE           | {'alpha': 0.25 {'block_conf |
| (1, 3, 2, 6, 4) | 2 |   | 16 | CE           | {'alpha': 0.25 {'block_conf |
| (1, 3, 2, 6, 4) | 2 |   | 8  | CE           | {'alpha': 0.25 {'block_conf |
| (1, 3, 2, 6, 4) | 2 |   | 8  | CE           | {'alpha': 0.25 {'block_conf |
| (2, 6, 4, 12, 8 | 4 | 2 | 16 | reduced-foca | {'alpha': 1.0, {'block_conf |
| (2, 6, 4, 12, 8 | 4 | 2 | 16 | reduced-foca | {'alpha': 1.0, {'block_conf |
| (2, 6, 4, 12, 8 | 4 | 2 | 8  | reduced-foca | {'alpha': 1.0, {'block_conf |
| (2, 6, 4, 12, 8 | 4 | 2 | 8  | reduced-foca | {'alpha': 1.0, {'block_conf |
| (2, 6, 4, 12, 8 | 2 | 2 | 16 | reduced-foca | {'alpha': 1.0, {'block_conf |
| (2, 6, 4, 12, 8 | 2 | 2 | 16 | reduced-foca | {'alpha': 1.0, {'block_conf |
| (2, 6, 4, 12, 8 | 2 | 2 | 8  | reduced-foca | {'alpha': 1.0, {'block_conf |
| (2, 6, 4, 12, 8 | 2 | 2 | 8  | reduced-foca | {'alpha': 1.0, {'block_conf |
| (1, 3, 2, 6, 4) | 4 | 2 | 16 | reduced-foca | {'alpha': 1.0, {'block_conf |
| (1, 3, 2, 6, 4) | 4 | 2 | 16 | reduced-foca | {'alpha': 1.0, {'block_conf |
| (1, 3, 2, 6, 4) | 4 | 2 | 8  | reduced-foca | {'alpha': 1.0, {'block_conf |
| (1, 3, 2, 6, 4) | 4 | 2 | 8  | reduced-foca | {'alpha': 1.0, {'block_conf |
| (1, 3, 2, 6, 4) | 2 | 2 | 16 | reduced-foca | {'alpha': 1.0, {'block_conf |
| (1, 3, 2, 6, 4) | 2 | 2 | 16 | reduced-foca | {'alpha': 1.0, {'block_conf |
| (1, 3, 2, 6, 4) | 2 | 2 | 8  | reduced-foca | {'alpha': 1.0, {'block_conf |
| (1, 3, 2, 6, 4) | 2 | 2 | 8  | reduced-foca | {'alpha': 1.0, {'block_conf |
| (2, 6, 4, 12, 8 | 4 | 1 | 16 | reduced-foca | {'alpha': 1.0, {'block_conf |
| (2, 6, 4, 12, 8 | 4 | 1 | 16 | reduced-foca | {'alpha': 1.0, {'block_conf |
| (2, 6, 4, 12, 8 | 4 | 1 | 8  | reduced-foca | {'alpha': 1.0, {'block_conf |
| (2, 6, 4, 12, 8 | 4 | 1 | 8  | reduced-foca | {'alpha': 1.0, {'block_conf |
| (2, 6, 4, 12, 8 | 2 | 1 | 16 | reduced-foca | {'alpha': 1.0, {'block_conf |
| (2, 6, 4, 12, 8 | 2 | 1 | 16 | reduced-foca | {'alpha': 1.0, {'block_conf |
| (2, 6, 4, 12, 8 | 2 | 1 | 8  | reduced-foca | {'alpha': 1.0, {'block_conf |
| (2, 6, 4, 12, 8 | 2 | 1 | 8  | reduced-foca | {'alpha': 1.0, {'block_conf |
| (1, 3, 2, 6, 4) | 4 | 1 | 16 | reduced-foca | {'alpha': 1.0, {'block_conf |

|                  |   |     |    |                                           |
|------------------|---|-----|----|-------------------------------------------|
| (1, 3, 2, 6, 4)  | 4 | 1   | 16 | reduced-foca {'alpha': 1.0, '{'block_conf |
| (1, 3, 2, 6, 4)  | 4 | 1   | 8  | reduced-foca {'alpha': 1.0, '{'block_conf |
| (1, 3, 2, 6, 4)  | 4 | 1   | 8  | reduced-foca {'alpha': 1.0, '{'block_conf |
| (1, 3, 2, 6, 4)  | 2 | 1   | 16 | reduced-foca {'alpha': 1.0, '{'block_conf |
| (1, 3, 2, 6, 4)  | 2 | 1   | 16 | reduced-foca {'alpha': 1.0, '{'block_conf |
| (1, 3, 2, 6, 4)  | 2 | 1   | 8  | reduced-foca {'alpha': 1.0, '{'block_conf |
| (1, 3, 2, 6, 4)  | 2 | 1   | 8  | reduced-foca {'alpha': 1.0, '{'block_conf |
| (2, 6, 4, 12, 8) | 4 | 0.5 | 16 | reduced-foca {'alpha': 1.0, '{'block_conf |
| (2, 6, 4, 12, 8) | 4 | 0.5 | 16 | reduced-foca {'alpha': 1.0, '{'block_conf |
| (2, 6, 4, 12, 8) | 4 | 0.5 | 8  | reduced-foca {'alpha': 1.0, '{'block_conf |
| (2, 6, 4, 12, 8) | 4 | 0.5 | 8  | reduced-foca {'alpha': 1.0, '{'block_conf |
| (2, 6, 4, 12, 8) | 2 | 0.5 | 16 | reduced-foca {'alpha': 1.0, '{'block_conf |
| (2, 6, 4, 12, 8) | 2 | 0.5 | 16 | reduced-foca {'alpha': 1.0, '{'block_conf |
| (2, 6, 4, 12, 8) | 2 | 0.5 | 8  | reduced-foca {'alpha': 1.0, '{'block_conf |
| (2, 6, 4, 12, 8) | 2 | 0.5 | 8  | reduced-foca {'alpha': 1.0, '{'block_conf |
| (1, 3, 2, 6, 4)  | 4 | 0.5 | 16 | reduced-foca {'alpha': 1.0, '{'block_conf |
| (1, 3, 2, 6, 4)  | 4 | 0.5 | 16 | reduced-foca {'alpha': 1.0, '{'block_conf |
| (1, 3, 2, 6, 4)  | 4 | 0.5 | 8  | reduced-foca {'alpha': 1.0, '{'block_conf |
| (1, 3, 2, 6, 4)  | 4 | 0.5 | 8  | reduced-foca {'alpha': 1.0, '{'block_conf |
| (1, 3, 2, 6, 4)  | 2 | 0.5 | 16 | reduced-foca {'alpha': 1.0, '{'block_conf |
| (1, 3, 2, 6, 4)  | 2 | 0.5 | 16 | reduced-foca {'alpha': 1.0, '{'block_conf |
| (1, 3, 2, 6, 4)  | 2 | 0.5 | 8  | reduced-foca {'alpha': 1.0, '{'block_conf |
| (1, 3, 2, 6, 4)  | 2 | 0.5 | 8  | reduced-foca {'alpha': 1.0, '{'block_conf |
| (2, 6, 4, 12, 8) | 4 | 2   | 16 | reduced-foca {'alpha': 0.5, '{'block_conf |
| (2, 6, 4, 12, 8) | 4 | 2   | 16 | reduced-foca {'alpha': 0.5, '{'block_conf |
| (2, 6, 4, 12, 8) | 4 | 2   | 8  | reduced-foca {'alpha': 0.5, '{'block_conf |
| (2, 6, 4, 12, 8) | 4 | 2   | 8  | reduced-foca {'alpha': 0.5, '{'block_conf |
| (2, 6, 4, 12, 8) | 2 | 2   | 16 | reduced-foca {'alpha': 0.5, '{'block_conf |
| (2, 6, 4, 12, 8) | 2 | 2   | 16 | reduced-foca {'alpha': 0.5, '{'block_conf |
| (2, 6, 4, 12, 8) | 2 | 2   | 8  | reduced-foca {'alpha': 0.5, '{'block_conf |
| (2, 6, 4, 12, 8) | 2 | 2   | 8  | reduced-foca {'alpha': 0.5, '{'block_conf |
| (1, 3, 2, 6, 4)  | 4 | 2   | 16 | reduced-foca {'alpha': 0.5, '{'block_conf |
| (1, 3, 2, 6, 4)  | 4 | 2   | 16 | reduced-foca {'alpha': 0.5, '{'block_conf |
| (1, 3, 2, 6, 4)  | 4 | 2   | 8  | reduced-foca {'alpha': 0.5, '{'block_conf |
| (1, 3, 2, 6, 4)  | 4 | 2   | 8  | reduced-foca {'alpha': 0.5, '{'block_conf |
| (1, 3, 2, 6, 4)  | 2 | 2   | 16 | reduced-foca {'alpha': 0.5, '{'block_conf |
| (1, 3, 2, 6, 4)  | 2 | 2   | 16 | reduced-foca {'alpha': 0.5, '{'block_conf |
| (1, 3, 2, 6, 4)  | 2 | 2   | 8  | reduced-foca {'alpha': 0.5, '{'block_conf |
| (1, 3, 2, 6, 4)  | 2 | 2   | 8  | reduced-foca {'alpha': 0.5, '{'block_conf |
| (2, 6, 4, 12, 8) | 4 | 1   | 16 | reduced-foca {'alpha': 0.5, '{'block_conf |
| (2, 6, 4, 12, 8) | 4 | 1   | 16 | reduced-foca {'alpha': 0.5, '{'block_conf |

|                 |   |     |    |                                           |
|-----------------|---|-----|----|-------------------------------------------|
| (2, 6, 4, 12, 8 | 4 | 1   | 8  | reduced-foca {'alpha': 0.5, '{'block_conf |
| (2, 6, 4, 12, 8 | 4 | 1   | 8  | reduced-foca {'alpha': 0.5, '{'block_conf |
| (2, 6, 4, 12, 8 | 2 | 1   | 16 | reduced-foca {'alpha': 0.5, '{'block_conf |
| (2, 6, 4, 12, 8 | 2 | 1   | 16 | reduced-foca {'alpha': 0.5, '{'block_conf |
| (2, 6, 4, 12, 8 | 2 | 1   | 8  | reduced-foca {'alpha': 0.5, '{'block_conf |
| (2, 6, 4, 12, 8 | 2 | 1   | 8  | reduced-foca {'alpha': 0.5, '{'block_conf |
| (1, 3, 2, 6, 4) | 4 | 1   | 16 | reduced-foca {'alpha': 0.5, '{'block_conf |
| (1, 3, 2, 6, 4) | 4 | 1   | 16 | reduced-foca {'alpha': 0.5, '{'block_conf |
| (1, 3, 2, 6, 4) | 4 | 1   | 8  | reduced-foca {'alpha': 0.5, '{'block_conf |
| (1, 3, 2, 6, 4) | 4 | 1   | 8  | reduced-foca {'alpha': 0.5, '{'block_conf |
| (1, 3, 2, 6, 4) | 2 | 1   | 16 | reduced-foca {'alpha': 0.5, '{'block_conf |
| (1, 3, 2, 6, 4) | 2 | 1   | 16 | reduced-foca {'alpha': 0.5, '{'block_conf |
| (1, 3, 2, 6, 4) | 2 | 1   | 8  | reduced-foca {'alpha': 0.5, '{'block_conf |
| (1, 3, 2, 6, 4) | 2 | 1   | 8  | reduced-foca {'alpha': 0.5, '{'block_conf |
| (2, 6, 4, 12, 8 | 4 | 0.5 | 16 | reduced-foca {'alpha': 0.5, '{'block_conf |
| (2, 6, 4, 12, 8 | 4 | 0.5 | 16 | reduced-foca {'alpha': 0.5, '{'block_conf |
| (2, 6, 4, 12, 8 | 4 | 0.5 | 8  | reduced-foca {'alpha': 0.5, '{'block_conf |
| (2, 6, 4, 12, 8 | 4 | 0.5 | 8  | reduced-foca {'alpha': 0.5, '{'block_conf |
| (2, 6, 4, 12, 8 | 2 | 0.5 | 16 | reduced-foca {'alpha': 0.5, '{'block_conf |
| (2, 6, 4, 12, 8 | 2 | 0.5 | 16 | reduced-foca {'alpha': 0.5, '{'block_conf |
| (2, 6, 4, 12, 8 | 2 | 0.5 | 8  | reduced-foca {'alpha': 0.5, '{'block_conf |
| (2, 6, 4, 12, 8 | 2 | 0.5 | 8  | reduced-foca {'alpha': 0.5, '{'block_conf |
| (1, 3, 2, 6, 4) | 4 | 0.5 | 16 | reduced-foca {'alpha': 0.5, '{'block_conf |
| (1, 3, 2, 6, 4) | 4 | 0.5 | 16 | reduced-foca {'alpha': 0.5, '{'block_conf |
| (1, 3, 2, 6, 4) | 4 | 0.5 | 8  | reduced-foca {'alpha': 0.5, '{'block_conf |
| (1, 3, 2, 6, 4) | 4 | 0.5 | 8  | reduced-foca {'alpha': 0.5, '{'block_conf |
| (1, 3, 2, 6, 4) | 2 | 0.5 | 16 | reduced-foca {'alpha': 0.5, '{'block_conf |
| (1, 3, 2, 6, 4) | 2 | 0.5 | 16 | reduced-foca {'alpha': 0.5, '{'block_conf |
| (1, 3, 2, 6, 4) | 2 | 0.5 | 8  | reduced-foca {'alpha': 0.5, '{'block_conf |
| (1, 3, 2, 6, 4) | 2 | 0.5 | 8  | reduced-foca {'alpha': 0.5, '{'block_conf |
| (2, 6, 4, 12, 8 | 4 | 2   | 16 | reduced-foca {'alpha': 0.25 {'block_conf  |
| (2, 6, 4, 12, 8 | 4 | 2   | 16 | reduced-foca {'alpha': 0.25 {'block_conf  |
| (2, 6, 4, 12, 8 | 4 | 2   | 8  | reduced-foca {'alpha': 0.25 {'block_conf  |
| (2, 6, 4, 12, 8 | 4 | 2   | 8  | reduced-foca {'alpha': 0.25 {'block_conf  |
| (2, 6, 4, 12, 8 | 2 | 2   | 16 | reduced-foca {'alpha': 0.25 {'block_conf  |
| (2, 6, 4, 12, 8 | 2 | 2   | 16 | reduced-foca {'alpha': 0.25 {'block_conf  |
| (2, 6, 4, 12, 8 | 2 | 2   | 8  | reduced-foca {'alpha': 0.25 {'block_conf  |
| (2, 6, 4, 12, 8 | 2 | 2   | 8  | reduced-foca {'alpha': 0.25 {'block_conf  |
| (1, 3, 2, 6, 4) | 4 | 2   | 16 | reduced-foca {'alpha': 0.25 {'block_conf  |
| (1, 3, 2, 6, 4) | 4 | 2   | 16 | reduced-foca {'alpha': 0.25 {'block_conf  |
| (1, 3, 2, 6, 4) | 4 | 2   | 8  | reduced-foca {'alpha': 0.25 {'block_conf  |

|                  |   |     |    |              |                              |
|------------------|---|-----|----|--------------|------------------------------|
| (1, 3, 2, 6, 4)  | 4 | 2   | 8  | reduced-foca | {'alpha': 0.25, {'block_conf |
| (1, 3, 2, 6, 4)  | 2 | 2   | 16 | reduced-foca | {'alpha': 0.25, {'block_conf |
| (1, 3, 2, 6, 4)  | 2 | 2   | 16 | reduced-foca | {'alpha': 0.25, {'block_conf |
| (1, 3, 2, 6, 4)  | 2 | 2   | 8  | reduced-foca | {'alpha': 0.25, {'block_conf |
| (1, 3, 2, 6, 4)  | 2 | 2   | 8  | reduced-foca | {'alpha': 0.25, {'block_conf |
| (2, 6, 4, 12, 8) | 4 | 1   | 16 | reduced-foca | {'alpha': 0.25, {'block_conf |
| (2, 6, 4, 12, 8) | 4 | 1   | 16 | reduced-foca | {'alpha': 0.25, {'block_conf |
| (2, 6, 4, 12, 8) | 4 | 1   | 8  | reduced-foca | {'alpha': 0.25, {'block_conf |
| (2, 6, 4, 12, 8) | 4 | 1   | 8  | reduced-foca | {'alpha': 0.25, {'block_conf |
| (2, 6, 4, 12, 8) | 2 | 1   | 16 | reduced-foca | {'alpha': 0.25, {'block_conf |
| (2, 6, 4, 12, 8) | 2 | 1   | 16 | reduced-foca | {'alpha': 0.25, {'block_conf |
| (2, 6, 4, 12, 8) | 2 | 1   | 8  | reduced-foca | {'alpha': 0.25, {'block_conf |
| (2, 6, 4, 12, 8) | 2 | 1   | 8  | reduced-foca | {'alpha': 0.25, {'block_conf |
| (1, 3, 2, 6, 4)  | 4 | 1   | 16 | reduced-foca | {'alpha': 0.25, {'block_conf |
| (1, 3, 2, 6, 4)  | 4 | 1   | 16 | reduced-foca | {'alpha': 0.25, {'block_conf |
| (1, 3, 2, 6, 4)  | 4 | 1   | 8  | reduced-foca | {'alpha': 0.25, {'block_conf |
| (1, 3, 2, 6, 4)  | 4 | 1   | 8  | reduced-foca | {'alpha': 0.25, {'block_conf |
| (1, 3, 2, 6, 4)  | 2 | 1   | 16 | reduced-foca | {'alpha': 0.25, {'block_conf |
| (1, 3, 2, 6, 4)  | 2 | 1   | 16 | reduced-foca | {'alpha': 0.25, {'block_conf |
| (1, 3, 2, 6, 4)  | 2 | 1   | 8  | reduced-foca | {'alpha': 0.25, {'block_conf |
| (1, 3, 2, 6, 4)  | 2 | 1   | 8  | reduced-foca | {'alpha': 0.25, {'block_conf |
| (2, 6, 4, 12, 8) | 4 | 0.5 | 16 | reduced-foca | {'alpha': 0.25, {'block_conf |
| (2, 6, 4, 12, 8) | 4 | 0.5 | 16 | reduced-foca | {'alpha': 0.25, {'block_conf |
| (2, 6, 4, 12, 8) | 4 | 0.5 | 8  | reduced-foca | {'alpha': 0.25, {'block_conf |
| (2, 6, 4, 12, 8) | 4 | 0.5 | 8  | reduced-foca | {'alpha': 0.25, {'block_conf |
| (2, 6, 4, 12, 8) | 2 | 0.5 | 16 | reduced-foca | {'alpha': 0.25, {'block_conf |
| (2, 6, 4, 12, 8) | 2 | 0.5 | 16 | reduced-foca | {'alpha': 0.25, {'block_conf |
| (2, 6, 4, 12, 8) | 2 | 0.5 | 8  | reduced-foca | {'alpha': 0.25, {'block_conf |
| (2, 6, 4, 12, 8) | 2 | 0.5 | 8  | reduced-foca | {'alpha': 0.25, {'block_conf |
| (1, 3, 2, 6, 4)  | 4 | 0.5 | 16 | reduced-foca | {'alpha': 0.25, {'block_conf |
| (1, 3, 2, 6, 4)  | 4 | 0.5 | 16 | reduced-foca | {'alpha': 0.25, {'block_conf |
| (1, 3, 2, 6, 4)  | 4 | 0.5 | 8  | reduced-foca | {'alpha': 0.25, {'block_conf |
| (1, 3, 2, 6, 4)  | 4 | 0.5 | 8  | reduced-foca | {'alpha': 0.25, {'block_conf |
| (1, 3, 2, 6, 4)  | 2 | 0.5 | 16 | reduced-foca | {'alpha': 0.25, {'block_conf |
| (1, 3, 2, 6, 4)  | 2 | 0.5 | 16 | reduced-foca | {'alpha': 0.25, {'block_conf |
| (1, 3, 2, 6, 4)  | 2 | 0.5 | 8  | reduced-foca | {'alpha': 0.25, {'block_conf |
| (1, 3, 2, 6, 4)  | 2 | 0.5 | 8  | reduced-foca | {'alpha': 0.25, {'block_conf |
| (2, 6, 4, 12, 8) | 4 | 2   | 16 | focal        | {'alpha': 1.0, {'block_conf  |
| (2, 6, 4, 12, 8) | 4 | 2   | 16 | focal        | {'alpha': 1.0, {'block_conf  |
| (2, 6, 4, 12, 8) | 4 | 2   | 8  | focal        | {'alpha': 1.0, {'block_conf  |
| (2, 6, 4, 12, 8) | 4 | 2   | 8  | focal        | {'alpha': 1.0, {'block_conf  |



|                  |   |     |    |       |                             |
|------------------|---|-----|----|-------|-----------------------------|
| (2, 6, 4, 12, 8) | 2 | 2   | 16 | focal | {'alpha': 1.0, {'block_conf |
| (2, 6, 4, 12, 8) | 2 | 2   | 16 | focal | {'alpha': 1.0, {'block_conf |
| (2, 6, 4, 12, 8) | 2 | 2   | 8  | focal | {'alpha': 1.0, {'block_conf |
| (2, 6, 4, 12, 8) | 2 | 2   | 8  | focal | {'alpha': 1.0, {'block_conf |
| (1, 3, 2, 6, 4)  | 4 | 2   | 16 | focal | {'alpha': 1.0, {'block_conf |
| (1, 3, 2, 6, 4)  | 4 | 2   | 16 | focal | {'alpha': 1.0, {'block_conf |
| (1, 3, 2, 6, 4)  | 4 | 2   | 8  | focal | {'alpha': 1.0, {'block_conf |
| (1, 3, 2, 6, 4)  | 4 | 2   | 8  | focal | {'alpha': 1.0, {'block_conf |
| (1, 3, 2, 6, 4)  | 2 | 2   | 16 | focal | {'alpha': 1.0, {'block_conf |
| (1, 3, 2, 6, 4)  | 2 | 2   | 16 | focal | {'alpha': 1.0, {'block_conf |
| (1, 3, 2, 6, 4)  | 2 | 2   | 8  | focal | {'alpha': 1.0, {'block_conf |
| (1, 3, 2, 6, 4)  | 2 | 2   | 8  | focal | {'alpha': 1.0, {'block_conf |
| (2, 6, 4, 12, 8) | 4 | 1   | 16 | focal | {'alpha': 1.0, {'block_conf |
| (2, 6, 4, 12, 8) | 4 | 1   | 16 | focal | {'alpha': 1.0, {'block_conf |
| (2, 6, 4, 12, 8) | 4 | 1   | 8  | focal | {'alpha': 1.0, {'block_conf |
| (2, 6, 4, 12, 8) | 4 | 1   | 8  | focal | {'alpha': 1.0, {'block_conf |
| (2, 6, 4, 12, 8) | 2 | 1   | 16 | focal | {'alpha': 1.0, {'block_conf |
| (2, 6, 4, 12, 8) | 2 | 1   | 16 | focal | {'alpha': 1.0, {'block_conf |
| (2, 6, 4, 12, 8) | 2 | 1   | 8  | focal | {'alpha': 1.0, {'block_conf |
| (2, 6, 4, 12, 8) | 2 | 1   | 8  | focal | {'alpha': 1.0, {'block_conf |
| (1, 3, 2, 6, 4)  | 4 | 1   | 16 | focal | {'alpha': 1.0, {'block_conf |
| (1, 3, 2, 6, 4)  | 4 | 1   | 16 | focal | {'alpha': 1.0, {'block_conf |
| (1, 3, 2, 6, 4)  | 4 | 1   | 8  | focal | {'alpha': 1.0, {'block_conf |
| (1, 3, 2, 6, 4)  | 4 | 1   | 8  | focal | {'alpha': 1.0, {'block_conf |
| (1, 3, 2, 6, 4)  | 2 | 1   | 16 | focal | {'alpha': 1.0, {'block_conf |
| (1, 3, 2, 6, 4)  | 2 | 1   | 16 | focal | {'alpha': 1.0, {'block_conf |
| (1, 3, 2, 6, 4)  | 2 | 1   | 8  | focal | {'alpha': 1.0, {'block_conf |
| (1, 3, 2, 6, 4)  | 2 | 1   | 8  | focal | {'alpha': 1.0, {'block_conf |
| (2, 6, 4, 12, 8) | 4 | 0.5 | 16 | focal | {'alpha': 1.0, {'block_conf |
| (2, 6, 4, 12, 8) | 4 | 0.5 | 16 | focal | {'alpha': 1.0, {'block_conf |
| (2, 6, 4, 12, 8) | 4 | 0.5 | 8  | focal | {'alpha': 1.0, {'block_conf |
| (2, 6, 4, 12, 8) | 4 | 0.5 | 8  | focal | {'alpha': 1.0, {'block_conf |
| (2, 6, 4, 12, 8) | 2 | 0.5 | 16 | focal | {'alpha': 1.0, {'block_conf |
| (2, 6, 4, 12, 8) | 2 | 0.5 | 16 | focal | {'alpha': 1.0, {'block_conf |
| (2, 6, 4, 12, 8) | 2 | 0.5 | 8  | focal | {'alpha': 1.0, {'block_conf |
| (2, 6, 4, 12, 8) | 2 | 0.5 | 8  | focal | {'alpha': 1.0, {'block_conf |
| (1, 3, 2, 6, 4)  | 4 | 0.5 | 16 | focal | {'alpha': 1.0, {'block_conf |
| (1, 3, 2, 6, 4)  | 4 | 0.5 | 16 | focal | {'alpha': 1.0, {'block_conf |
| (1, 3, 2, 6, 4)  | 4 | 0.5 | 8  | focal | {'alpha': 1.0, {'block_conf |
| (1, 3, 2, 6, 4)  | 4 | 0.5 | 8  | focal | {'alpha': 1.0, {'block_conf |
| (1, 3, 2, 6, 4)  | 2 | 0.5 | 16 | focal | {'alpha': 1.0, {'block_conf |

|                  |   |     |    |       |                             |
|------------------|---|-----|----|-------|-----------------------------|
| (1, 3, 2, 6, 4)  | 2 | 0.5 | 16 | focal | {'alpha': 1.0, {'block_conf |
| (1, 3, 2, 6, 4)  | 2 | 0.5 | 8  | focal | {'alpha': 1.0, {'block_conf |
| (1, 3, 2, 6, 4)  | 2 | 0.5 | 8  | focal | {'alpha': 1.0, {'block_conf |
| (2, 6, 4, 12, 8) | 4 | 2   | 16 | focal | {'alpha': 0.5, {'block_conf |
| (2, 6, 4, 12, 8) | 4 | 2   | 16 | focal | {'alpha': 0.5, {'block_conf |
| (2, 6, 4, 12, 8) | 4 | 2   | 8  | focal | {'alpha': 0.5, {'block_conf |
| (2, 6, 4, 12, 8) | 4 | 2   | 8  | focal | {'alpha': 0.5, {'block_conf |
| (2, 6, 4, 12, 8) | 2 | 2   | 16 | focal | {'alpha': 0.5, {'block_conf |
| (2, 6, 4, 12, 8) | 2 | 2   | 16 | focal | {'alpha': 0.5, {'block_conf |
| (2, 6, 4, 12, 8) | 2 | 2   | 8  | focal | {'alpha': 0.5, {'block_conf |
| (2, 6, 4, 12, 8) | 2 | 2   | 8  | focal | {'alpha': 0.5, {'block_conf |
| (1, 3, 2, 6, 4)  | 4 | 2   | 16 | focal | {'alpha': 0.5, {'block_conf |
| (1, 3, 2, 6, 4)  | 4 | 2   | 16 | focal | {'alpha': 0.5, {'block_conf |
| (1, 3, 2, 6, 4)  | 4 | 2   | 8  | focal | {'alpha': 0.5, {'block_conf |
| (1, 3, 2, 6, 4)  | 4 | 2   | 8  | focal | {'alpha': 0.5, {'block_conf |
| (1, 3, 2, 6, 4)  | 2 | 2   | 16 | focal | {'alpha': 0.5, {'block_conf |
| (1, 3, 2, 6, 4)  | 2 | 2   | 16 | focal | {'alpha': 0.5, {'block_conf |
| (1, 3, 2, 6, 4)  | 2 | 2   | 8  | focal | {'alpha': 0.5, {'block_conf |
| (1, 3, 2, 6, 4)  | 2 | 2   | 8  | focal | {'alpha': 0.5, {'block_conf |
| (2, 6, 4, 12, 8) | 4 | 1   | 16 | focal | {'alpha': 0.5, {'block_conf |
| (2, 6, 4, 12, 8) | 4 | 1   | 16 | focal | {'alpha': 0.5, {'block_conf |
| (2, 6, 4, 12, 8) | 4 | 1   | 8  | focal | {'alpha': 0.5, {'block_conf |
| (2, 6, 4, 12, 8) | 4 | 1   | 8  | focal | {'alpha': 0.5, {'block_conf |
| (2, 6, 4, 12, 8) | 2 | 1   | 16 | focal | {'alpha': 0.5, {'block_conf |
| (2, 6, 4, 12, 8) | 2 | 1   | 16 | focal | {'alpha': 0.5, {'block_conf |
| (2, 6, 4, 12, 8) | 2 | 1   | 8  | focal | {'alpha': 0.5, {'block_conf |
| (2, 6, 4, 12, 8) | 2 | 1   | 8  | focal | {'alpha': 0.5, {'block_conf |
| (1, 3, 2, 6, 4)  | 4 | 1   | 16 | focal | {'alpha': 0.5, {'block_conf |
| (1, 3, 2, 6, 4)  | 4 | 1   | 16 | focal | {'alpha': 0.5, {'block_conf |
| (1, 3, 2, 6, 4)  | 4 | 1   | 8  | focal | {'alpha': 0.5, {'block_conf |
| (1, 3, 2, 6, 4)  | 4 | 1   | 8  | focal | {'alpha': 0.5, {'block_conf |
| (1, 3, 2, 6, 4)  | 2 | 1   | 16 | focal | {'alpha': 0.5, {'block_conf |
| (1, 3, 2, 6, 4)  | 2 | 1   | 16 | focal | {'alpha': 0.5, {'block_conf |
| (1, 3, 2, 6, 4)  | 2 | 1   | 8  | focal | {'alpha': 0.5, {'block_conf |
| (1, 3, 2, 6, 4)  | 2 | 1   | 8  | focal | {'alpha': 0.5, {'block_conf |
| (2, 6, 4, 12, 8) | 4 | 0.5 | 16 | focal | {'alpha': 0.5, {'block_conf |
| (2, 6, 4, 12, 8) | 4 | 0.5 | 16 | focal | {'alpha': 0.5, {'block_conf |
| (2, 6, 4, 12, 8) | 4 | 0.5 | 8  | focal | {'alpha': 0.5, {'block_conf |
| (2, 6, 4, 12, 8) | 4 | 0.5 | 8  | focal | {'alpha': 0.5, {'block_conf |
| (2, 6, 4, 12, 8) | 2 | 0.5 | 16 | focal | {'alpha': 0.5, {'block_conf |
| (2, 6, 4, 12, 8) | 2 | 0.5 | 16 | focal | {'alpha': 0.5, {'block_conf |

|                 |   |     |    |       |                             |
|-----------------|---|-----|----|-------|-----------------------------|
| (2, 6, 4, 12, 8 | 2 | 0.5 | 8  | focal | {'alpha': 0.5, {'block_conf |
| (2, 6, 4, 12, 8 | 2 | 0.5 | 8  | focal | {'alpha': 0.5, {'block_conf |
| (1, 3, 2, 6, 4) | 4 | 0.5 | 16 | focal | {'alpha': 0.5, {'block_conf |
| (1, 3, 2, 6, 4) | 4 | 0.5 | 16 | focal | {'alpha': 0.5, {'block_conf |
| (1, 3, 2, 6, 4) | 4 | 0.5 | 8  | focal | {'alpha': 0.5, {'block_conf |
| (1, 3, 2, 6, 4) | 4 | 0.5 | 8  | focal | {'alpha': 0.5, {'block_conf |
| (1, 3, 2, 6, 4) | 2 | 0.5 | 16 | focal | {'alpha': 0.5, {'block_conf |
| (1, 3, 2, 6, 4) | 2 | 0.5 | 16 | focal | {'alpha': 0.5, {'block_conf |
| (1, 3, 2, 6, 4) | 2 | 0.5 | 8  | focal | {'alpha': 0.5, {'block_conf |
| (1, 3, 2, 6, 4) | 2 | 0.5 | 8  | focal | {'alpha': 0.5, {'block_conf |
| (2, 6, 4, 12, 8 | 4 | 2   | 16 | focal | {'alpha': 0.25 {'block_conf |
| (2, 6, 4, 12, 8 | 4 | 2   | 16 | focal | {'alpha': 0.25 {'block_conf |
| (2, 6, 4, 12, 8 | 4 | 2   | 8  | focal | {'alpha': 0.25 {'block_conf |
| (2, 6, 4, 12, 8 | 4 | 2   | 8  | focal | {'alpha': 0.25 {'block_conf |
| (2, 6, 4, 12, 8 | 2 | 2   | 16 | focal | {'alpha': 0.25 {'block_conf |
| (2, 6, 4, 12, 8 | 2 | 2   | 16 | focal | {'alpha': 0.25 {'block_conf |
| (2, 6, 4, 12, 8 | 2 | 2   | 8  | focal | {'alpha': 0.25 {'block_conf |
| (2, 6, 4, 12, 8 | 2 | 2   | 8  | focal | {'alpha': 0.25 {'block_conf |
| (1, 3, 2, 6, 4) | 4 | 2   | 16 | focal | {'alpha': 0.25 {'block_conf |
| (1, 3, 2, 6, 4) | 4 | 2   | 16 | focal | {'alpha': 0.25 {'block_conf |
| (1, 3, 2, 6, 4) | 4 | 2   | 8  | focal | {'alpha': 0.25 {'block_conf |
| (1, 3, 2, 6, 4) | 4 | 2   | 8  | focal | {'alpha': 0.25 {'block_conf |
| (1, 3, 2, 6, 4) | 2 | 2   | 16 | focal | {'alpha': 0.25 {'block_conf |
| (1, 3, 2, 6, 4) | 2 | 2   | 16 | focal | {'alpha': 0.25 {'block_conf |
| (1, 3, 2, 6, 4) | 2 | 2   | 8  | focal | {'alpha': 0.25 {'block_conf |
| (1, 3, 2, 6, 4) | 2 | 2   | 8  | focal | {'alpha': 0.25 {'block_conf |
| (2, 6, 4, 12, 8 | 4 | 1   | 16 | focal | {'alpha': 0.25 {'block_conf |
| (2, 6, 4, 12, 8 | 4 | 1   | 16 | focal | {'alpha': 0.25 {'block_conf |
| (2, 6, 4, 12, 8 | 4 | 1   | 8  | focal | {'alpha': 0.25 {'block_conf |
| (2, 6, 4, 12, 8 | 4 | 1   | 8  | focal | {'alpha': 0.25 {'block_conf |
| (2, 6, 4, 12, 8 | 2 | 1   | 16 | focal | {'alpha': 0.25 {'block_conf |
| (2, 6, 4, 12, 8 | 2 | 1   | 16 | focal | {'alpha': 0.25 {'block_conf |
| (2, 6, 4, 12, 8 | 2 | 1   | 8  | focal | {'alpha': 0.25 {'block_conf |
| (2, 6, 4, 12, 8 | 2 | 1   | 8  | focal | {'alpha': 0.25 {'block_conf |
| (1, 3, 2, 6, 4) | 4 | 1   | 16 | focal | {'alpha': 0.25 {'block_conf |
| (1, 3, 2, 6, 4) | 4 | 1   | 16 | focal | {'alpha': 0.25 {'block_conf |
| (1, 3, 2, 6, 4) | 4 | 1   | 8  | focal | {'alpha': 0.25 {'block_conf |
| (1, 3, 2, 6, 4) | 4 | 1   | 8  | focal | {'alpha': 0.25 {'block_conf |
| (1, 3, 2, 6, 4) | 2 | 1   | 16 | focal | {'alpha': 0.25 {'block_conf |
| (1, 3, 2, 6, 4) | 2 | 1   | 16 | focal | {'alpha': 0.25 {'block_conf |
| (1, 3, 2, 6, 4) | 2 | 1   | 8  | focal | {'alpha': 0.25 {'block_conf |

|                  |   |     |    |             |                             |
|------------------|---|-----|----|-------------|-----------------------------|
| (1, 3, 2, 6, 4)  | 2 | 1   | 8  | focal       | {'alpha': 0.25 {'block_conf |
| (2, 6, 4, 12, 8) | 4 | 0.5 | 16 | focal       | {'alpha': 0.25 {'block_conf |
| (2, 6, 4, 12, 8) | 4 | 0.5 | 16 | focal       | {'alpha': 0.25 {'block_conf |
| (2, 6, 4, 12, 8) | 4 | 0.5 | 8  | focal       | {'alpha': 0.25 {'block_conf |
| (2, 6, 4, 12, 8) | 4 | 0.5 | 8  | focal       | {'alpha': 0.25 {'block_conf |
| (2, 6, 4, 12, 8) | 2 | 0.5 | 16 | focal       | {'alpha': 0.25 {'block_conf |
| (2, 6, 4, 12, 8) | 2 | 0.5 | 16 | focal       | {'alpha': 0.25 {'block_conf |
| (2, 6, 4, 12, 8) | 2 | 0.5 | 8  | focal       | {'alpha': 0.25 {'block_conf |
| (2, 6, 4, 12, 8) | 2 | 0.5 | 8  | focal       | {'alpha': 0.25 {'block_conf |
| (1, 3, 2, 6, 4)  | 4 | 0.5 | 16 | focal       | {'alpha': 0.25 {'block_conf |
| (1, 3, 2, 6, 4)  | 4 | 0.5 | 16 | focal       | {'alpha': 0.25 {'block_conf |
| (1, 3, 2, 6, 4)  | 4 | 0.5 | 8  | focal       | {'alpha': 0.25 {'block_conf |
| (1, 3, 2, 6, 4)  | 4 | 0.5 | 8  | focal       | {'alpha': 0.25 {'block_conf |
| (1, 3, 2, 6, 4)  | 2 | 0.5 | 16 | focal       | {'alpha': 0.25 {'block_conf |
| (1, 3, 2, 6, 4)  | 2 | 0.5 | 16 | focal       | {'alpha': 0.25 {'block_conf |
| (1, 3, 2, 6, 4)  | 2 | 0.5 | 8  | focal       | {'alpha': 0.25 {'block_conf |
| (1, 3, 2, 6, 4)  | 2 | 0.5 | 8  | focal       | {'alpha': 0.25 {'block_conf |
| (2, 6, 4, 12, 8) | 4 |     | 16 | weighted-CE | {'alpha': 1.0, {'block_conf |
| (2, 6, 4, 12, 8) | 4 |     | 16 | weighted-CE | {'alpha': 1.0, {'block_conf |
| (2, 6, 4, 12, 8) | 4 |     | 8  | weighted-CE | {'alpha': 1.0, {'block_conf |
| (2, 6, 4, 12, 8) | 4 |     | 8  | weighted-CE | {'alpha': 1.0, {'block_conf |
| (2, 6, 4, 12, 8) | 2 |     | 16 | weighted-CE | {'alpha': 1.0, {'block_conf |
| (2, 6, 4, 12, 8) | 2 |     | 16 | weighted-CE | {'alpha': 1.0, {'block_conf |
| (2, 6, 4, 12, 8) | 2 |     | 8  | weighted-CE | {'alpha': 1.0, {'block_conf |
| (2, 6, 4, 12, 8) | 2 |     | 8  | weighted-CE | {'alpha': 1.0, {'block_conf |
| (1, 3, 2, 6, 4)  | 4 |     | 16 | weighted-CE | {'alpha': 1.0, {'block_conf |
| (1, 3, 2, 6, 4)  | 4 |     | 16 | weighted-CE | {'alpha': 1.0, {'block_conf |
| (1, 3, 2, 6, 4)  | 4 |     | 8  | weighted-CE | {'alpha': 1.0, {'block_conf |
| (1, 3, 2, 6, 4)  | 4 |     | 8  | weighted-CE | {'alpha': 1.0, {'block_conf |
| (1, 3, 2, 6, 4)  | 2 |     | 16 | weighted-CE | {'alpha': 1.0, {'block_conf |
| (1, 3, 2, 6, 4)  | 2 |     | 16 | weighted-CE | {'alpha': 1.0, {'block_conf |
| (1, 3, 2, 6, 4)  | 2 |     | 8  | weighted-CE | {'alpha': 1.0, {'block_conf |
| (1, 3, 2, 6, 4)  | 2 |     | 8  | weighted-CE | {'alpha': 1.0, {'block_conf |
| (2, 6, 4, 12, 8) | 4 |     | 16 | CE          | {'alpha': 1.0, {'block_conf |
| (2, 6, 4, 12, 8) | 4 |     | 16 | CE          | {'alpha': 1.0, {'block_conf |
| (2, 6, 4, 12, 8) | 4 |     | 8  | CE          | {'alpha': 1.0, {'block_conf |
| (2, 6, 4, 12, 8) | 4 |     | 8  | CE          | {'alpha': 1.0, {'block_conf |
| (2, 6, 4, 12, 8) | 2 |     | 16 | CE          | {'alpha': 1.0, {'block_conf |
| (2, 6, 4, 12, 8) | 2 |     | 16 | CE          | {'alpha': 1.0, {'block_conf |
| (2, 6, 4, 12, 8) | 2 |     | 8  | CE          | {'alpha': 1.0, {'block_conf |
| (2, 6, 4, 12, 8) | 2 |     | 8  | CE          | {'alpha': 1.0, {'block_conf |

|                  |   |    |             |                             |
|------------------|---|----|-------------|-----------------------------|
| (1, 3, 2, 6, 4)  | 4 | 16 | CE          | {'alpha': 1.0, {'block_conf |
| (1, 3, 2, 6, 4)  | 4 | 16 | CE          | {'alpha': 1.0, {'block_conf |
| (1, 3, 2, 6, 4)  | 4 | 8  | CE          | {'alpha': 1.0, {'block_conf |
| (1, 3, 2, 6, 4)  | 4 | 8  | CE          | {'alpha': 1.0, {'block_conf |
| (1, 3, 2, 6, 4)  | 2 | 16 | CE          | {'alpha': 1.0, {'block_conf |
| (1, 3, 2, 6, 4)  | 2 | 16 | CE          | {'alpha': 1.0, {'block_conf |
| (1, 3, 2, 6, 4)  | 2 | 8  | CE          | {'alpha': 1.0, {'block_conf |
| (1, 3, 2, 6, 4)  | 2 | 8  | CE          | {'alpha': 1.0, {'block_conf |
| (2, 6, 4, 12, 8) | 4 | 16 | weighted-CE | {'alpha': 0.5, {'block_conf |
| (2, 6, 4, 12, 8) | 4 | 16 | weighted-CE | {'alpha': 0.5, {'block_conf |
| (2, 6, 4, 12, 8) | 4 | 8  | weighted-CE | {'alpha': 0.5, {'block_conf |
| (2, 6, 4, 12, 8) | 4 | 8  | weighted-CE | {'alpha': 0.5, {'block_conf |
| (2, 6, 4, 12, 8) | 2 | 16 | weighted-CE | {'alpha': 0.5, {'block_conf |
| (2, 6, 4, 12, 8) | 2 | 16 | weighted-CE | {'alpha': 0.5, {'block_conf |
| (2, 6, 4, 12, 8) | 2 | 8  | weighted-CE | {'alpha': 0.5, {'block_conf |
| (2, 6, 4, 12, 8) | 2 | 8  | weighted-CE | {'alpha': 0.5, {'block_conf |
| (1, 3, 2, 6, 4)  | 4 | 16 | weighted-CE | {'alpha': 0.5, {'block_conf |
| (1, 3, 2, 6, 4)  | 4 | 16 | weighted-CE | {'alpha': 0.5, {'block_conf |
| (1, 3, 2, 6, 4)  | 4 | 8  | weighted-CE | {'alpha': 0.5, {'block_conf |
| (1, 3, 2, 6, 4)  | 4 | 8  | weighted-CE | {'alpha': 0.5, {'block_conf |
| (1, 3, 2, 6, 4)  | 2 | 16 | weighted-CE | {'alpha': 0.5, {'block_conf |
| (1, 3, 2, 6, 4)  | 2 | 16 | weighted-CE | {'alpha': 0.5, {'block_conf |
| (1, 3, 2, 6, 4)  | 2 | 8  | weighted-CE | {'alpha': 0.5, {'block_conf |
| (1, 3, 2, 6, 4)  | 2 | 8  | weighted-CE | {'alpha': 0.5, {'block_conf |
| (2, 6, 4, 12, 8) | 4 | 16 | CE          | {'alpha': 0.5, {'block_conf |
| (2, 6, 4, 12, 8) | 4 | 16 | CE          | {'alpha': 0.5, {'block_conf |
| (2, 6, 4, 12, 8) | 4 | 8  | CE          | {'alpha': 0.5, {'block_conf |
| (2, 6, 4, 12, 8) | 4 | 8  | CE          | {'alpha': 0.5, {'block_conf |
| (2, 6, 4, 12, 8) | 2 | 16 | CE          | {'alpha': 0.5, {'block_conf |
| (2, 6, 4, 12, 8) | 2 | 16 | CE          | {'alpha': 0.5, {'block_conf |
| (2, 6, 4, 12, 8) | 2 | 8  | CE          | {'alpha': 0.5, {'block_conf |
| (2, 6, 4, 12, 8) | 2 | 8  | CE          | {'alpha': 0.5, {'block_conf |
| (1, 3, 2, 6, 4)  | 4 | 16 | CE          | {'alpha': 0.5, {'block_conf |
| (1, 3, 2, 6, 4)  | 4 | 16 | CE          | {'alpha': 0.5, {'block_conf |
| (1, 3, 2, 6, 4)  | 4 | 8  | CE          | {'alpha': 0.5, {'block_conf |
| (1, 3, 2, 6, 4)  | 4 | 8  | CE          | {'alpha': 0.5, {'block_conf |
| (1, 3, 2, 6, 4)  | 2 | 16 | CE          | {'alpha': 0.5, {'block_conf |
| (1, 3, 2, 6, 4)  | 2 | 16 | CE          | {'alpha': 0.5, {'block_conf |
| (1, 3, 2, 6, 4)  | 2 | 8  | CE          | {'alpha': 0.5, {'block_conf |
| (1, 3, 2, 6, 4)  | 2 | 8  | CE          | {'alpha': 0.5, {'block_conf |
| (2, 6, 4, 12, 8) | 4 | 16 | weighted-CE | {'alpha': 0.25 {'block_conf |

|                 |   |    |                                         |
|-----------------|---|----|-----------------------------------------|
| (2, 6, 4, 12, 8 | 4 | 16 | weighted-CE {'alpha': 0.25 {'block_conf |
| (2, 6, 4, 12, 8 | 4 | 8  | weighted-CE {'alpha': 0.25 {'block_conf |
| (2, 6, 4, 12, 8 | 4 | 8  | weighted-CE {'alpha': 0.25 {'block_conf |
| (2, 6, 4, 12, 8 | 2 | 16 | weighted-CE {'alpha': 0.25 {'block_conf |
| (2, 6, 4, 12, 8 | 2 | 16 | weighted-CE {'alpha': 0.25 {'block_conf |
| (2, 6, 4, 12, 8 | 2 | 8  | weighted-CE {'alpha': 0.25 {'block_conf |
| (2, 6, 4, 12, 8 | 2 | 8  | weighted-CE {'alpha': 0.25 {'block_conf |
| (1, 3, 2, 6, 4) | 4 | 16 | weighted-CE {'alpha': 0.25 {'block_conf |
| (1, 3, 2, 6, 4) | 4 | 16 | weighted-CE {'alpha': 0.25 {'block_conf |
| (1, 3, 2, 6, 4) | 4 | 8  | weighted-CE {'alpha': 0.25 {'block_conf |
| (1, 3, 2, 6, 4) | 4 | 8  | weighted-CE {'alpha': 0.25 {'block_conf |
| (1, 3, 2, 6, 4) | 2 | 16 | weighted-CE {'alpha': 0.25 {'block_conf |
| (1, 3, 2, 6, 4) | 2 | 16 | weighted-CE {'alpha': 0.25 {'block_conf |
| (1, 3, 2, 6, 4) | 2 | 8  | weighted-CE {'alpha': 0.25 {'block_conf |
| (1, 3, 2, 6, 4) | 2 | 8  | weighted-CE {'alpha': 0.25 {'block_conf |
| (2, 6, 4, 12, 8 | 4 | 16 | CE {'alpha': 0.25 {'block_conf          |
| (2, 6, 4, 12, 8 | 4 | 16 | CE {'alpha': 0.25 {'block_conf          |
| (2, 6, 4, 12, 8 | 4 | 8  | CE {'alpha': 0.25 {'block_conf          |
| (2, 6, 4, 12, 8 | 4 | 8  | CE {'alpha': 0.25 {'block_conf          |
| (2, 6, 4, 12, 8 | 2 | 16 | CE {'alpha': 0.25 {'block_conf          |
| (2, 6, 4, 12, 8 | 2 | 16 | CE {'alpha': 0.25 {'block_conf          |
| (2, 6, 4, 12, 8 | 2 | 8  | CE {'alpha': 0.25 {'block_conf          |
| (2, 6, 4, 12, 8 | 2 | 8  | CE {'alpha': 0.25 {'block_conf          |
| (1, 3, 2, 6, 4) | 4 | 16 | CE {'alpha': 0.25 {'block_conf          |
| (1, 3, 2, 6, 4) | 4 | 16 | CE {'alpha': 0.25 {'block_conf          |
| (1, 3, 2, 6, 4) | 4 | 8  | CE {'alpha': 0.25 {'block_conf          |
| (1, 3, 2, 6, 4) | 4 | 8  | CE {'alpha': 0.25 {'block_conf          |
| (1, 3, 2, 6, 4) | 2 | 16 | CE {'alpha': 0.25 {'block_conf          |
| (1, 3, 2, 6, 4) | 2 | 16 | CE {'alpha': 0.25 {'block_conf          |
| (1, 3, 2, 6, 4) | 2 | 8  | CE {'alpha': 0.25 {'block_conf          |
| (1, 3, 2, 6, 4) | 2 | 8  | CE {'alpha': 0.25 {'block_conf          |

| num_init_feareduce_th | AUC | TPR1       | TPR2       |            |
|-----------------------|-----|------------|------------|------------|
| 16                    | 0.5 | 1.93448889 | 0.4        | 0.58666667 |
| 8                     | 0.5 | 1.62488889 | 0.36       | 0.42666667 |
| 16                    | 0.5 | 2.25342222 | 0.52888889 | 0.62666667 |
| 8                     | 0.5 | 2.61413333 | 0.6        | 0.73333333 |
| 16                    | 0.5 | 1.98364444 | 0.408      | 0.52       |
| 8                     | 0.5 | 1.63608889 | 0.37333333 | 0.46666667 |
| 16                    | 0.5 | 2.47297778 | 0.6        | 0.70666667 |
| 8                     | 0.5 | 2.20195556 | 0.46666667 | 0.61333333 |
| 16                    | 0.5 | 2.0656     | 0.4        | 0.57333333 |

|    |     |            |            |            |
|----|-----|------------|------------|------------|
| 8  | 0.5 | 2.55653333 | 0.62666667 | 0.70666667 |
| 16 | 0.5 | 2.39591111 | 0.45333333 | 0.69333333 |
| 8  | 0.5 | 2.48133333 | 0.58666667 | 0.72       |
| 16 | 0.5 | 2.59226667 | 0.57333333 | 0.69333333 |
| 8  | 0.5 | 2.65662222 | 0.57333333 | 0.70222222 |
| 16 | 0.5 | 2.48524444 | 0.52       | 0.69333333 |
| 8  | 0.5 | 2.65546667 | 0.61333333 | 0.74666667 |
| 16 | 0.5 | 1.95875556 | 0.44512821 | 0.56148148 |
| 8  | 0.5 | 2.05822222 | 0.43466667 | 0.56       |
| 16 | 0.5 | 2.63342222 | 0.61333333 | 0.73333333 |
| 8  | 0.5 | 2.30364444 | 0.46666667 | 0.66666667 |
| 16 | 0.5 | 2.11875556 | 0.49333333 | 0.57333333 |
| 8  | 0.5 | 1.59866667 | 0.32       | 0.44       |
| 16 | 0.5 | 2.74728889 | 0.64       | 0.72       |
| 8  | 0.5 | 2.60471111 | 0.60333333 | 0.70666667 |
| 16 | 0.5 | 2.78897778 | 0.65333333 | 0.77333333 |
| 8  | 0.5 | 2.72702222 | 0.64       | 0.76       |
| 16 | 0.5 | 2.52826667 | 0.57333333 | 0.70666667 |
| 8  | 0.5 | 2.45653333 | 0.52       | 0.69333333 |
| 16 | 0.5 | 2.66568889 | 0.58666667 | 0.74666667 |
| 8  | 0.5 | 2.49004444 | 0.49333333 | 0.70666667 |
| 16 | 0.5 | 2.46337778 | 0.58666667 | 0.68       |
| 8  | 0.5 | 2.49466667 | 0.54333333 | 0.715      |
| 16 | 0.5 | 1.74417778 | 0.34666667 | 0.49333333 |
| 8  | 0.5 | 2.13813333 | 0.42060606 | 0.61333333 |
| 16 | 0.5 | 2.66177778 | 0.62333333 | 0.74666667 |
| 8  | 0.5 | 2.55315556 | 0.53666667 | 0.70666667 |
| 16 | 0.5 | 1.87786667 | 0.37777778 | 0.53333333 |
| 8  | 0.5 | 2.11262222 | 0.48       | 0.61333333 |
| 16 | 0.5 | 2.61528889 | 0.6        | 0.70666667 |
| 8  | 0.5 | 2.72533333 | 0.64       | 0.76       |
| 16 | 0.5 | 2.58515556 | 0.58       | 0.72       |
| 8  | 0.5 | 2.21715556 | 0.48       | 0.58333333 |
| 16 | 0.5 | 2.65724444 | 0.61333333 | 0.76       |
| 8  | 0.5 | 2.88817778 | 0.73619048 | 0.8        |
| 16 | 0.5 | 2.77831111 | 0.63666667 | 0.76       |
| 8  | 0.5 | 2.17644444 | 0.48       | 0.61333333 |
| 16 | 0.5 | 2.54684444 | 0.6        | 0.69333333 |
| 8  | 0.5 | 2.41173333 | 0.51       | 0.68       |
| 16 | 0.5 | 1.81928889 | 0.36       | 0.48571429 |
| 8  | 0.5 | 2.60266667 | 0.56       | 0.74666667 |

|    |     |            |            |            |
|----|-----|------------|------------|------------|
| 16 | 0.5 | 2.6992     | 0.56       | 0.74518519 |
| 8  | 0.5 | 2.62764444 | 0.58222222 | 0.72222222 |
| 16 | 0.5 | 2.30613333 | 0.50666667 | 0.65333333 |
| 8  | 0.5 | 2.31546667 | 0.505      | 0.68       |
| 16 | 0.5 | 2.47262222 | 0.56       | 0.69333333 |
| 8  | 0.5 | 2.59662222 | 0.63407407 | 0.72       |
| 16 | 0.5 | 2.48764444 | 0.54666667 | 0.69333333 |
| 8  | 0.5 | 2.62933333 | 0.58666667 | 0.736      |
| 16 | 0.5 | 2.54222222 | 0.56       | 0.72       |
| 8  | 0.5 | 2.62088889 | 0.59333333 | 0.70431373 |
| 16 | 0.5 | 2.20097778 | 0.46666667 | 0.62666667 |
| 8  | 0.5 | 2.4336     | 0.57333333 | 0.69333333 |
| 16 | 0.5 | 2.61608889 | 0.55666667 | 0.74666667 |
| 8  | 0.5 | 2.59982222 | 0.58666667 | 0.70666667 |
| 16 | 0.5 | 1.99208889 | 0.46666667 | 0.52       |
| 8  | 0.5 | 2.31102222 | 0.52       | 0.65333333 |
| 16 | 0.5 | 2.6952     | 0.6        | 0.71777778 |
| 8  | 0.5 | 2.76275556 | 0.61333333 | 0.77333333 |
| 16 | 0.5 | 1.684      | 0.33333333 | 0.46666667 |
| 8  | 0.5 | 2.02293333 | 0.44       | 0.56333333 |
| 16 | 0.5 | 2.55813333 | 0.56       | 0.72       |
| 8  | 0.5 | 2.43928889 | 0.57333333 | 0.69333333 |
| 16 | 0.5 | 2.3424     | 0.47555556 | 0.66666667 |
| 8  | 0.5 | 2.5696     | 0.6        | 0.73333333 |
| 16 | 0.5 | 2.83306667 | 0.66666667 | 0.77960784 |
| 8  | 0.5 | 2.5312     | 0.57333333 | 0.7        |
| 16 | 0.5 | 1.99964444 | 0.41333333 | 0.55466667 |
| 8  | 0.5 | 2.72693333 | 0.66       | 0.73333333 |
| 16 | 0.5 | 2.48906667 | 0.55466667 | 0.70933333 |
| 8  | 0.5 | 2.64728889 | 0.64       | 0.73333333 |
| 16 | 0.5 | 2.1792     | 0.46333333 | 0.64       |
| 8  | 0.5 | 2.04088889 | 0.42133333 | 0.55238095 |
| 16 | 0.5 | 2.1168     | 0.42666667 | 0.61111111 |
| 8  | 0.5 | 2.26648889 | 0.44       | 0.64       |
| 16 | 0.5 | 1.8232     | 0.37833333 | 0.53333333 |
| 8  | 0.5 | 2.35742222 | 0.54       | 0.63333333 |
| 16 | 0.5 | 2.48524444 | 0.55555556 | 0.68       |
| 8  | 0.5 | 2.68551111 | 0.61333333 | 0.75333333 |
| 16 | 0.5 | 2.40035556 | 0.56       | 0.69333333 |
| 8  | 0.5 | 2.74462222 | 0.62666667 | 0.74666667 |
| 16 | 0.5 | 2.45635556 | 0.53333333 | 0.70666667 |



|    |     |            |            |            |
|----|-----|------------|------------|------------|
| 8  | 0.5 | 2.38577778 | 0.50666667 | 0.68       |
| 16 | 0.5 | 0          | 0          | 0          |
| 8  | 0.5 | 2.66266667 | 0.61833333 | 0.72       |
| 16 | 0.5 | 2.53173333 | 0.61333333 | 0.70666667 |
| 8  | 0.5 | 2.45484444 | 0.52       | 0.69333333 |
| 16 | 0.5 | 1.82497778 | 0.32888889 | 0.52       |
| 8  | 0.5 | 1.73146667 | 0.34444444 | 0.50666667 |
| 16 | 0.5 | 2.81031111 | 0.68444444 | 0.76       |
| 8  | 0.5 | 2.78897778 | 0.66666667 | 0.73333333 |
| 16 | 0.5 | 2.09164444 | 0.48       | 0.57333333 |
| 8  | 0.5 | 1.79031111 | 0.40606061 | 0.52       |
| 16 | 0.5 | 2.57511111 | 0.56       | 0.73333333 |
| 8  | 0.5 | 2.54444444 | 0.54933333 | 0.72       |
| 16 | 0.5 | 2.7552     | 0.64888889 | 0.78666667 |
| 8  | 0.5 | 2.68382222 | 0.63466667 | 0.74166667 |
| 16 | 0.5 | 2.38284444 | 0.52       | 0.66666667 |
| 8  | 0.5 | 2.56595556 | 0.54666667 | 0.73333333 |
| 16 | 0.5 | 1.85146667 | 0.36266667 | 0.54666667 |
| 8  | 0.5 | 2.54515556 | 0.54933333 | 0.73333333 |
| 16 | 0.5 | 2.36542222 | 0.52       | 0.6562963  |
| 8  | 0.5 | 2.25617778 | 0.42222222 | 0.65333333 |
| 16 | 0.5 | 1.80764444 | 0.38666667 | 0.53333333 |
| 8  | 0.5 | 1.99057778 | 0.41333333 | 0.57333333 |
| 16 | 0.5 | 2.752      | 0.62       | 0.76190476 |
| 8  | 0.5 | 2.62062222 | 0.56666667 | 0.73333333 |
| 16 | 0.5 | 2.28906667 | 0.49333333 | 0.64       |
| 8  | 0.5 | 1.94151111 | 0.45333333 | 0.53333333 |
| 16 | 0.5 | 2.75093333 | 0.59619048 | 0.73333333 |
| 8  | 0.5 | 2.44711111 | 0.53333333 | 0.69777778 |
| 16 | 0.5 | 2.59235556 | 0.6        | 0.70769231 |
| 8  | 0.5 | 2.19084444 | 0.49333333 | 0.62666667 |
| 16 | 0.5 | 2.43164444 | 0.53777778 | 0.68       |
| 8  | 0.5 | 2.58737778 | 0.62666667 | 0.70666667 |
| 16 | 0.5 | 2.26533333 | 0.49333333 | 0.65333333 |
| 8  | 0.5 | 2.46293333 | 0.52       | 0.68       |
| 16 | 0.5 | 2.58195556 | 0.57333333 | 0.705      |
| 8  | 0.5 | 2.53991111 | 0.52       | 0.70666667 |
| 16 | 0.5 | 2.03262222 | 0.46666667 | 0.56       |
| 8  | 0.5 | 1.79733333 | 0.38666667 | 0.52       |
| 16 | 0.5 | 2.59804444 | 0.6        | 0.74666667 |
| 8  | 0.5 | 2.40186667 | 0.5362963  | 0.67733333 |

|    |            |            |            |            |
|----|------------|------------|------------|------------|
| 16 | 0.5        | 1.60835556 | 0.28       | 0.46266667 |
| 8  | 0.5        | 2.22933333 | 0.47619048 | 0.65333333 |
| 16 | 0.5        | 2.64888889 | 0.61333333 | 0.70666667 |
| 8  | 0.5        | 2.65608889 | 0.58666667 | 0.76       |
| 16 | 0.5        | 2.28488889 | 0.44       | 0.68       |
| 8  | 0.5        | 2.45031111 | 0.52       | 0.72       |
| 16 | 0.5        | 2.37902222 | 0.52       | 0.66666667 |
| 8  | 0.5        | 2.51973333 | 0.58666667 | 0.72       |
| 16 | 0.5        | 2.36755556 | 0.52666667 | 0.68       |
| 8  | 0.5        | 2.64133333 | 0.57333333 | 0.73333333 |
| 16 | 0.5        | 2.55671111 | 0.54666667 | 0.70666667 |
| 8  | 0.5        | 2.58942222 | 0.61333333 | 0.72       |
| 16 |            | 2.20853333 | 0.47589744 | 0.6        |
| 8  |            | 1.7448     | 0.38666667 | 0.48571429 |
| 16 |            | 2.47084444 | 0.52       | 0.70222222 |
| 8  |            | 2.43928889 | 0.53555556 | 0.68       |
| 16 |            | 1.89804444 | 0.39666667 | 0.544      |
| 8  |            | 1.80791111 | 0.38666667 | 0.50666667 |
| 16 |            | 2.37822222 | 0.45333333 | 0.70666667 |
| 8  |            | 2.40711111 | 0.55333333 | 0.69333333 |
| 16 |            | 2.50497778 | 0.54333333 | 0.66666667 |
| 8  |            | 2.3632     | 0.48       | 0.68       |
| 16 |            | 2.58613333 | 0.56571429 | 0.73393939 |
| 8  |            | 2.59182222 | 0.54666667 | 0.72444444 |
| 16 |            | 2.68168889 | 0.60222222 | 0.74666667 |
| 8  |            | 2.73955556 | 0.6        | 0.74933333 |
| 16 |            | 2.58435556 | 0.60444444 | 0.73333333 |
| 8  |            | 2.26408889 | 0.45333333 | 0.64       |
| 16 |            | 2.01004444 | 0.44380952 | 0.57333333 |
| 8  |            | 1.63875556 | 0.34666667 | 0.44       |
| 16 |            | 2.37857778 | 0.4969697  | 0.68       |
| 8  | 2.39626667 |            | 0.50222222 | 0.66666667 |
| 16 | 1.94764444 |            | 0.37904762 | 0.54666667 |
| 8  | 1.85253333 |            | 0.41333333 | 0.53238095 |
| 16 | 2.59564444 |            | 0.61       | 0.71515152 |
| 8  | 2.51608889 |            | 0.58333333 | 0.72       |
| 16 | 2.668      |            | 0.58666667 | 0.76       |
| 8  | 2.49733333 |            | 0.53333333 | 0.72       |
| 16 | 2.47742222 |            | 0.54666667 | 0.69333333 |
| 8  | 2.5928     |            | 0.59111111 | 0.73333333 |
| 16 | 2.40728889 |            | 0.53185185 | 0.65916667 |

|    |            |            |            |
|----|------------|------------|------------|
| 8  | 2.50151111 | 0.57333333 | 0.68       |
| 16 | 2.54248889 | 0.52       | 0.73333333 |
| 8  | 2.67351111 | 0.6        | 0.73333333 |
| 16 | 1.9832     | 0.44       | 0.56       |
| 8  | 1.89208889 | 0.38222222 | 0.53333333 |
| 16 | 2.32035556 | 0.48666667 | 0.64       |
| 8  | 2.73955556 | 0.64       | 0.73333333 |
| 16 | 1.60471111 | 0.33333333 | 0.46666667 |
| 8  | 2.14524444 | 0.472      | 0.58666667 |
| 16 | 2.56257778 | 0.6        | 0.70666667 |
| 8  | 2.38453333 | 0.50666667 | 0.68133333 |
| 16 | 2.80204444 | 0.67466667 | 0.76       |
| 8  | 2.62782222 | 0.58666667 | 0.73333333 |
| 16 | 0          | 0          | 0          |
| 8  | 2.57342222 | 0.57333333 | 0.70974359 |
| 16 | 2.77128889 | 0.65333333 | 0.76       |
| 8  | 2.48311111 | 0.545      | 0.69333333 |
| 16 | 0          | 0          | 0          |
| 8  | 2.70382222 | 0.58666667 | 0.74666667 |
| 16 | 1.91511111 | 0.44       | 0.54666667 |
| 8  | 1.79368889 | 0.36533333 | 0.49066667 |
| 16 | 2.78871111 | 0.62181818 | 0.77333333 |
| 8  | 2.42684444 | 0.52       | 0.69333333 |
| 16 | 1.64293333 | 0.30358974 | 0.46666667 |
| 8  | 1.87662222 | 0.44       | 0.54666667 |
| 16 | 2.21395556 | 0.52       | 0.63703704 |
| 8  | 2.59262222 | 0.57333333 | 0.72       |
| 16 | 2.63911111 | 0.5752381  | 0.73333333 |
| 8  | 2.31911111 | 0.45333333 | 0.66666667 |
| 16 | 2.39431111 | 0.50564103 | 0.69333333 |
| 8  | 2.35511111 | 0.51111111 | 0.66666667 |
| 16 | 2.56115556 | 0.53333333 | 0.72       |
| 8  | 2.77173333 | 0.66666667 | 0.76       |
| 16 | 2.50684444 | 0.54666667 | 0.69333333 |
| 8  | 2.33626667 | 0.52       | 0.66666667 |
| 16 | 2.28915556 | 0.46666667 | 0.66666667 |
| 8  | 2.30773333 | 0.53466667 | 0.65333333 |
| 16 | 2.57795556 | 0.58666667 | 0.72       |
| 8  | 2.68204444 | 0.62       | 0.74666667 |
| 16 | 1.83226667 | 0.37466667 | 0.49728395 |
| 8  | 1.93848889 | 0.45333333 | 0.52       |

|    |            |            |            |
|----|------------|------------|------------|
| 16 | 2.60124444 | 0.57333333 | 0.72       |
| 8  | 2.52471111 | 0.56       | 0.7        |
| 16 | 2.5584     | 0.57833333 | 0.72       |
| 8  | 2.56871111 | 0.6        | 0.70666667 |
| 16 | 2.79804444 | 0.6        | 0.78       |
| 8  | 2.83937778 | 0.66133333 | 0.77333333 |
| 16 | 2.57973333 | 0.63333333 | 0.72       |
| 8  | 2.45324444 | 0.56       | 0.69333333 |
| 16 | 2.63937778 | 0.60888889 | 0.72727273 |
| 8  | 2.61404444 | 0.61714286 | 0.70666667 |
| 16 | 1.94204444 | 0.42666667 | 0.51555556 |
| 8  | 1.99173333 | 0.44       | 0.5255914  |
| 16 | 2.46826667 | 0.52       | 0.7        |
| 8  | 2.60302222 | 0.6        | 0.72       |
| 16 | 2.53146667 | 0.6        | 0.69333333 |
| 8  | 2.3512     | 0.54666667 | 0.64       |
| 16 | 2.67644444 | 0.61333333 | 0.73333333 |
| 8  | 2.39724444 | 0.52       | 0.69333333 |
| 16 | 2.32231111 | 0.54333333 | 0.62666667 |
| 8  | 2.73306667 | 0.64       | 0.74666667 |
| 16 | 2.58088889 | 0.58133333 | 0.73777778 |
| 8  | 2.49306667 | 0.54666667 | 0.70666667 |
| 16 | 2.3472     | 0.52       | 0.66666667 |
| 8  | 2.47431111 | 0.56       | 0.68       |
| 16 | 2.45511111 | 0.55333333 | 0.69333333 |
| 8  | 2.46168889 | 0.56       | 0.69333333 |
| 16 | 1.88071111 | 0.37333333 | 0.54666667 |
| 8  | 1.67946667 | 0.37833333 | 0.46666667 |
| 16 | 2.4992     | 0.592      | 0.68       |
| 8  | 2.49608889 | 0.54666667 | 0.68833333 |
| 16 | 1.78684444 | 0.34666667 | 0.50666667 |
| 8  | 1.99706667 | 0.464      | 0.54666667 |
| 16 | 2.27786667 | 0.49333333 | 0.64       |
| 8  | 2.33111111 | 0.48848485 | 0.66666667 |
| 16 | 2.47048889 | 0.48888889 | 0.70666667 |
| 8  | 2.66195556 | 0.6        | 0.73333333 |
| 16 | 2.39768889 | 0.53333333 | 0.69333333 |
| 8  | 2.63866667 | 0.62166667 | 0.69714286 |
| 16 | 2.53795556 | 0.59333333 | 0.70666667 |
| 8  | 2.34773333 | 0.53333333 | 0.66666667 |
| 16 | 2.29466667 | 0.52       | 0.62666667 |

|    |            |            |            |
|----|------------|------------|------------|
| 8  | 2.0776     | 0.42       | 0.62666667 |
| 16 | 1.61377778 | 0.34666667 | 0.45333333 |
| 8  | 1.73013333 | 0.36444444 | 0.50666667 |
| 16 | 2.60195556 | 0.58952381 | 0.72       |
| 8  | 2.45386667 | 0.54666667 | 0.664      |
| 16 | 1.96746667 | 0.44166667 | 0.57066667 |
| 8  | 2.01404444 | 0.4        | 0.57333333 |
| 16 | 2.34302222 | 0.54666667 | 0.6762963  |
| 8  | 2.61333333 | 0.61333333 | 0.69333333 |
| 16 | 2.74186667 | 0.64       | 0.76       |
| 8  | 2.12577778 | 0.48       | 0.57333333 |
| 16 | 2.65768889 | 0.58666667 | 0.74666667 |
| 8  | 2.37893333 | 0.56       | 0.66666667 |
| 16 | 2.58764444 | 0.58095238 | 0.70518519 |
| 8  | 2.81946667 | 0.66666667 | 0.77333333 |
| 16 | 2.48293333 | 0.53333333 | 0.70666667 |
| 8  | 2.61137778 | 0.57333333 | 0.72266667 |
| 16 | 1.86773333 | 0.42666667 | 0.52       |
| 8  | 2.09075556 | 0.49333333 | 0.57333333 |
| 16 | 2.76826667 | 0.58666667 | 0.74666667 |
| 8  | 2.33271111 | 0.52666667 | 0.62       |
| 16 | 1.78764444 | 0.4230303  | 0.50666667 |
| 8  | 1.92666667 | 0.44       | 0.54666667 |
| 16 | 2.55208889 | 0.55333333 | 0.70666667 |
| 8  | 2.57315556 | 0.6        | 0.71428571 |
| 16 | 2.72888889 | 0.66666667 | 0.74666667 |
| 8  | 2.57653333 | 0.6        | 0.72       |
| 16 | 2.45262222 | 0.54       | 0.69333333 |
| 8  | 2.51342222 | 0.51911111 | 0.70666667 |
| 16 | 2.16293333 | 0.44       | 0.61333333 |
| 8  | 1.94586667 | 0.42666667 | 0.58666667 |
| 16 | 2.62275556 | 0.58666667 | 0.74666667 |
| 8  | 2.39644444 | 0.54666667 | 0.66666667 |
| 16 | 2.26995556 | 0.48666667 | 0.64       |
| 8  | 1.94071111 | 0.42222222 | 0.53333333 |
| 16 | 2.57466667 | 0.50666667 | 0.72       |
| 8  | 2.77733333 | 0.66666667 | 0.74666667 |
| 16 | 2.18897778 | 0.50133333 | 0.6        |
| 8  | 1.91715556 | 0.43111111 | 0.54133333 |
| 16 | 1.724      | 0.38666667 | 0.48833333 |
| 8  | 2.74773333 | 0.64       | 0.77333333 |

|    |            |            |            |
|----|------------|------------|------------|
| 16 | 2.50346667 | 0.59666667 | 0.70666667 |
| 8  | 2.65973333 | 0.58666667 | 0.73333333 |
| 16 | 2.34622222 | 0.50933333 | 0.67583333 |
| 8  | 2.38897778 | 0.48740741 | 0.68       |
| 16 | 2.61991111 | 0.56       | 0.72       |
| 8  | 2.14231111 | 0.45333333 | 0.57333333 |
| 16 | 2.4656     | 0.56       | 0.70666667 |
| 8  | 2.44995556 | 0.54666667 | 0.69333333 |
| 16 | 2.38897778 | 0.52       | 0.68       |
| 8  | 1.71475556 | 0.34666667 | 0.48       |
| 16 | 2.17866667 | 0.488      | 0.59       |
| 8  | 2.68568889 | 0.64444444 | 0.70666667 |
| 16 | 2.4152     | 0.54285714 | 0.65939394 |
| 8  | 2.55155556 | 0.56       | 0.69333333 |
| 16 | 2.47431111 | 0.54666667 | 0.68       |
| 8  | 2.58773333 | 0.64       | 0.70666667 |
| 16 | 2.32835556 | 0.53333333 | 0.66666667 |
| 8  | 2.73191111 | 0.61444444 | 0.74666667 |
| 16 | 2.56417778 | 0.58933333 | 0.70666667 |
| 8  | 2.72008889 | 0.62666667 | 0.73333333 |
| 16 | 2.54853333 | 0.54666667 | 0.69212121 |
| 8  | 2.59066667 | 0.58666667 | 0.72       |
| 16 | 2.3304     | 0.46666667 | 0.68       |
| 8  | 2.536      | 0.54166667 | 0.71111111 |
| 16 | 1.72951111 | 0.30666667 | 0.49333333 |
| 8  | 1.70231111 | 0.4        | 0.45933333 |
| 16 | 2.36764444 | 0.50666667 | 0.65333333 |
| 8  | 2.49564444 | 0.62666667 | 0.70666667 |
| 16 | 2.39102222 | 0.576      | 0.65777778 |
| 8  | 2.19893333 | 0.45333333 | 0.64       |
| 16 | 2.67608889 | 0.65333333 | 0.75333333 |
| 8  | 2.35617778 | 0.50666667 | 0.65333333 |
| 16 | 2.58328889 | 0.53333333 | 0.72666667 |
| 8  | 2.32711111 | 0.47555556 | 0.67212121 |
| 16 | 2.44088889 | 0.54666667 | 0.68       |
| 8  | 2.67582222 | 0.64952381 | 0.73333333 |
| 16 | 2.6392     | 0.57333333 | 0.74666667 |
| 8  | 2.5616     | 0.56       | 0.73333333 |
| 16 | 2.19688889 | 0.48666667 | 0.64       |
| 8  | 2.3168     | 0.49333333 | 0.6544     |
| 16 | 2.34604444 | 0.49333333 | 0.65333333 |

|    |            |            |            |
|----|------------|------------|------------|
| 8  | 2.32986667 | 0.51238095 | 0.62166667 |
| 16 | 2.53644444 | 0.56       | 0.72       |
| 8  | 2.59342222 | 0.5769697  | 0.71393939 |
| 16 | 2.36053333 | 0.51333333 | 0.66666667 |
| 8  | 2.0296     | 0.43666667 | 0.57333333 |
| 16 | 2.32568889 | 0.48       | 0.66666667 |
| 8  | 2.56017778 | 0.49333333 | 0.71619048 |
| 16 | 2.68968889 | 0.53266667 | 0.752      |
| 8  | 2.76977778 | 0.66857143 | 0.74666667 |
| 16 | 2.54782222 | 0.6        | 0.69333333 |
| 8  | 2.53866667 | 0.54666667 | 0.70666667 |
| 16 | 2.64391111 | 0.62133333 | 0.73333333 |
| 8  | 2.61866667 | 0.6        | 0.71111111 |
| 16 | 2.58977778 | 0.57333333 | 0.70666667 |
| 8  | 2.57244444 | 0.54666667 | 0.73333333 |
| 16 | 1.97475556 | 0.43238095 | 0.54666667 |
| 8  | 2.09733333 | 0.45904762 | 0.56       |
| 16 | 2.34248889 | 0.49166667 | 0.66333333 |
| 8  | 2.37582222 | 0.53333333 | 0.68       |
| 16 | 2.23902222 | 0.47333333 | 0.61333333 |
| 8  | 2.13146667 | 0.43151515 | 0.61333333 |
| 16 | 2.09875556 | 0.42666667 | 0.56333333 |
| 8  | 2.37777778 | 0.56       | 0.66666667 |
| 16 | 2.2257778  | 0.40733333 | 0.64       |
| 8  | 2.69066667 | 0.59111111 | 0.76       |
| 16 | 2.41564444 | 0.50666667 | 0.67666667 |
| 8  | 2.52017778 | 0.55111111 | 0.70666667 |
| 16 | 2.24942222 | 0.46666667 | 0.67333333 |
| 8  | 2.29137778 | 0.50222222 | 0.66666667 |
| 16 | 2.3848     | 0.525      | 0.68848485 |
| 8  | 2.09484444 | 0.42871795 | 0.57333333 |
| 16 | 1.92675556 | 0.37111111 | 0.54666667 |
| 8  | 1.89573333 | 0.38666667 | 0.53333333 |
| 16 | 2.39208889 | 0.53333333 | 0.68       |
| 8  | 2.5528     | 0.61428571 | 0.72       |
| 16 | 1.93831111 | 0.40444444 | 0.54666667 |
| 8  | 2.10026667 | 0.44       | 0.58666667 |
| 16 | 2.66142222 | 0.65333333 | 0.70666667 |
| 8  | 2.7584     | 0.61333333 | 0.74933333 |
| 16 | 2.7288     | 0.62555556 | 0.76       |
| 8  | 2.5584     | 0.58666667 | 0.70666667 |

|    |     |            |            |            |
|----|-----|------------|------------|------------|
| 16 |     | 2.53635556 | 0.57333333 | 0.73333333 |
| 8  |     | 2.51048889 | 0.59238095 | 0.69333333 |
| 16 |     | 2.55688889 | 0.57111111 | 0.70666667 |
| 8  |     | 2.58817778 | 0.61333333 | 0.70666667 |
| 16 |     | 2.34373333 | 0.42666667 | 0.69238095 |
| 8  |     | 2.53466667 | 0.54666667 | 0.72       |
| 16 | 0.5 | 1.57315556 | 0.33333333 | 0.42666667 |
| 8  | 0.5 | 1.74444444 | 0.33111111 | 0.49333333 |
| 16 | 0.5 | 2.61688889 | 0.595      | 0.70666667 |
| 8  | 0.5 | 2.61875556 | 0.61333333 | 0.73333333 |
| 16 | 0.5 | 2.35253333 | 0.46666667 | 0.62666667 |
| 8  | 0.5 | 2.03911111 | 0.44       | 0.55794872 |
| 16 | 0.5 | 2.5624     | 0.62666667 | 0.71733333 |
| 8  | 0.5 | 2.63911111 | 0.56       | 0.73333333 |
| 16 | 0.5 | 2.58186667 | 0.58666667 | 0.70666667 |
| 8  | 0.5 | 2.55973333 | 0.56       | 0.73333333 |
| 16 | 0.5 | 2.57253333 | 0.57333333 | 0.73333333 |
| 8  | 0.5 | 2.68186667 | 0.61333333 | 0.76       |
| 16 | 0.5 | 2.50577778 | 0.525      | 0.70666667 |
| 8  | 0.5 | 2.66524444 | 0.62814815 | 0.73333333 |
| 16 | 0.5 | 2.65306667 | 0.61333333 | 0.72       |
| 8  | 0.5 | 2.42782222 | 0.49111111 | 0.70666667 |
| 16 | 0.5 | 1.81511111 | 0.43333333 | 0.50666667 |
| 8  | 0.5 | 2.04942222 | 0.44761905 | 0.56       |
| 16 | 0.5 | 2.57137778 | 0.61666667 | 0.73333333 |
| 8  | 0.5 | 2.62844444 | 0.56       | 0.755      |
| 16 | 0.5 | 2.0544     | 0.45333333 | 0.56333333 |
| 8  | 0.5 | 1.47137778 | 0.28       | 0.44       |
| 16 | 0.5 | 2.3416     | 0.55333333 | 0.65333333 |
| 8  | 0.5 | 2.86373333 | 0.64       | 0.78666667 |
| 16 | 0.5 | 2.54737778 | 0.54666667 | 0.70666667 |
| 8  | 0.5 | 1.51697778 | 0.32444444 | 0.41333333 |
| 16 | 0.5 | 2.52853333 | 0.53866667 | 0.71733333 |
| 8  | 0.5 | 2.43848889 | 0.56       | 0.68       |
| 16 | 0.5 | 2.61333333 | 0.58666667 | 0.73333333 |
| 8  | 0.5 | 2.83386667 | 0.64       | 0.76       |
| 16 | 0.5 | 2.48284444 | 0.56       | 0.70666667 |
| 8  | 0.5 | 2.48853333 | 0.55111111 | 0.69333333 |
| 16 | 0.5 | 1.69004444 | 0.34666667 | 0.47384615 |
| 8  | 0.5 | 1.67511111 | 0.35515152 | 0.4515942  |
| 16 | 0.5 | 2.4208     | 0.56       | 0.68       |



|    |     |            |            |            |
|----|-----|------------|------------|------------|
| 8  | 0.5 | 2.25733333 | 0.49777778 | 0.65333333 |
| 16 | 0.5 | 1.71555556 | 0.36095238 | 0.49333333 |
| 8  | 0.5 | 2.02942222 | 0.40952381 | 0.57166667 |
| 16 | 0.5 | 2.52924444 | 0.62666667 | 0.69166667 |
| 8  | 0.5 | 1.88426667 | 0.41333333 | 0.53333333 |
| 16 | 0.5 | 2.7416     | 0.61333333 | 0.74285714 |
| 8  | 0.5 | 2.0976     | 0.42       | 0.60571429 |
| 16 | 0.5 | 2.51733333 | 0.56       | 0.70666667 |
| 8  | 0.5 | 2.62195556 | 0.57333333 | 0.74666667 |
| 16 | 0.5 | 2.07662222 | 0.472      | 0.6        |
| 8  | 0.5 | 2.40471111 | 0.53333333 | 0.66666667 |
| 16 | 0.5 | 2.668      | 0.65333333 | 0.73333333 |
| 8  | 0.5 | 2.39075556 | 0.56952381 | 0.66666667 |
| 16 | 0.5 | 1.9056     | 0.38933333 | 0.56       |
| 8  | 0.5 | 1.86293333 | 0.41333333 | 0.52       |
| 16 | 0.5 | 2.47528889 | 0.53333333 | 0.69333333 |
| 8  | 0.5 | 2.69493333 | 0.6        | 0.76       |
| 16 | 0.5 | 2.056      | 0.43833333 | 0.58666667 |
| 8  | 0.5 | 1.9904     | 0.40888889 | 0.55111111 |
| 16 | 0.5 | 2.4632     | 0.56       | 0.69555556 |
| 8  | 0.5 | 2.12506667 | 0.44       | 0.62431373 |
| 16 | 0.5 | 2.57182222 | 0.59555556 | 0.72       |
| 8  | 0.5 | 2.49991111 | 0.53333333 | 0.70666667 |
| 16 | 0.5 | 1.97013333 | 0.45333333 | 0.54666667 |
| 8  | 0.5 | 2.70755556 | 0.62       | 0.78666667 |
| 16 | 0.5 | 2.64088889 | 0.59       | 0.72533333 |
| 8  | 0.5 | 2.50213333 | 0.54666667 | 0.68       |
| 16 | 0.5 | 2.39386667 | 0.52       | 0.68       |
| 8  | 0.5 | 2.37537778 | 0.49333333 | 0.70083333 |
| 16 | 0.5 | 1.69964444 | 0.36       | 0.48       |
| 8  | 0.5 | 1.65093333 | 0.37333333 | 0.45333333 |
| 16 | 0.5 | 2.61271111 | 0.6        | 0.72       |
| 8  | 0.5 | 2.66835556 | 0.62333333 | 0.72       |
| 16 | 0.5 | 2.15022222 | 0.48       | 0.6        |
| 8  | 0.5 | 1.96817778 | 0.41333333 | 0.54666667 |
| 16 | 0.5 | 2.11395556 | 0.43333333 | 0.6        |
| 8  | 0.5 | 2.79848889 | 0.67272727 | 0.76       |
| 16 | 0.5 | 2.68791111 | 0.61666667 | 0.73333333 |
| 8  | 0.5 | 2.63431111 | 0.58666667 | 0.74666667 |
| 16 | 0.5 | 2.53733333 | 0.61403509 | 0.69333333 |
| 8  | 0.5 | 2.81528889 | 0.63555556 | 0.77333333 |

|    |     |            |            |            |
|----|-----|------------|------------|------------|
| 16 | 0.5 | 2.45884444 | 0.51466667 | 0.66666667 |
| 8  | 0.5 | 2.47413333 | 0.51555556 | 0.72       |
| 16 | 0.5 | 2.41964444 | 0.54666667 | 0.66666667 |
| 8  | 0.5 | 2.7832     | 0.65555556 | 0.77333333 |
| 16 | 0.5 | 1.76       | 0.34933333 | 0.50666667 |
| 8  | 0.5 | 2.18764444 | 0.50666667 | 0.61333333 |
| 16 | 0.5 | 2.53155556 | 0.57333333 | 0.70666667 |
| 8  | 0.5 | 2.65306667 | 0.62666667 | 0.73333333 |
| 16 | 0.5 | 1.98773333 | 0.45833333 | 0.57333333 |
| 8  | 0.5 | 1.64844444 | 0.33333333 | 0.47130435 |
| 16 | 0.5 | 2.41715556 | 0.50666667 | 0.69333333 |
| 8  | 0.5 | 2.76622222 | 0.62666667 | 0.77333333 |
| 16 | 0.5 | 2.5672     | 0.58666667 | 0.70666667 |
| 8  | 0.5 | 2.63591111 | 0.58518519 | 0.70666667 |
| 16 | 0.5 | 2.60088889 | 0.62666667 | 0.70666667 |
| 8  | 0.5 | 2.59484444 | 0.62222222 | 0.685      |
| 16 | 0.5 | 2.46888889 | 0.57       | 0.68       |
| 8  | 0.5 | 2.52266667 | 0.53333333 | 0.69333333 |
| 16 | 0.5 | 2.22711111 | 0.43809524 | 0.66666667 |
| 8  | 0.5 | 2.67511111 | 0.59555556 | 0.73       |
| 16 | 0.5 | 1.71475556 | 0.37454545 | 0.48666667 |
| 8  | 0.5 | 1.70355556 | 0.36       | 0.48       |
| 16 | 0.5 | 2.65724444 | 0.63555556 | 0.74666667 |
| 8  | 0.5 | 2.74142222 | 0.58666667 | 0.74666667 |
| 16 | 0.5 | 2.10106667 | 0.45333333 | 0.57333333 |
| 8  | 0.5 | 2.13475556 | 0.50666667 | 0.56828829 |
| 16 | 0.5 | 2.74782222 | 0.65333333 | 0.74666667 |
| 8  | 0.5 | 2.55226667 | 0.49333333 | 0.73333333 |
| 16 | 0.5 | 2.4472     | 0.54666667 | 0.68       |
| 8  | 0.5 | 2.46613333 | 0.54666667 | 0.68266667 |
| 16 | 0.5 | 2.31697778 | 0.49333333 | 0.66666667 |
| 8  | 0.5 | 2.40302222 | 0.49333333 | 0.66666667 |
| 16 | 0.5 | 2.51884444 | 0.57333333 | 0.67636364 |
| 8  | 0.5 | 2.55751111 | 0.54133333 | 0.73333333 |
| 16 | 0.5 | 2.55075556 | 0.59047619 | 0.72       |
| 8  | 0.5 | 2.56995556 | 0.61333333 | 0.70666667 |
| 16 | 0.5 | 2.1616     | 0.49142857 | 0.61098039 |
| 8  | 0.5 | 1.74888889 | 0.36       | 0.50533333 |
| 16 | 0.5 | 2.53964444 | 0.54666667 | 0.71282051 |
| 8  | 0.5 | 2.43155556 | 0.52606061 | 0.65333333 |
| 16 | 0.5 | 2.16924444 | 0.49333333 | 0.58666667 |

|    |            |            |            |            |
|----|------------|------------|------------|------------|
| 8  | 0.5        | 2.31093333 | 0.51733333 | 0.64       |
| 16 | 0.5        | 2.6056     | 0.57111111 | 0.73333333 |
| 8  | 0.5        | 2.5128     | 0.57333333 | 0.70242424 |
| 16 | 0.5        | 2.46177778 | 0.54666667 | 0.66666667 |
| 8  | 0.5        | 2.6424     | 0.6        | 0.74666667 |
| 16 | 0.5        | 2.82266667 | 0.62666667 | 0.766      |
| 8  | 0.5        | 2.4632     | 0.54666667 | 0.69333333 |
| 16 | 0.5        | 2.6424     | 0.59272727 | 0.73333333 |
| 8  | 0.5        | 2.5384     | 0.57333333 | 0.68       |
| 16 | 0.5        | 2.46568889 | 0.54666667 | 0.70666667 |
| 8  | 0.5        | 2.53546667 | 0.58666667 | 0.72       |
| 16 | 0.5        | 0          | 0          | 0          |
| 8  | 0.5        | 2.56915556 | 0.54222222 | 0.73333333 |
| 16 | 0.5        | 2.59564444 | 0.55111111 | 0.76       |
| 8  | 0.5        | 2.61235556 | 0.58666667 | 0.70666667 |
| 16 | 0.5        | 2.18293333 | 0.52148148 | 0.61333333 |
| 8  | 0.5        | 2.064      | 0.46333333 | 0.56       |
| 16 | 0.5        | 2.57102222 | 0.58       | 0.71368421 |
| 8  | 0.5        | 2.54888889 | 0.51555556 | 0.72       |
| 16 | 0.5        | 2.44026667 | 0.52       | 0.73333333 |
| 8  | 0.5        | 2.38853333 | 0.51       | 0.69333333 |
| 16 | 0.5        | 2.56737778 | 0.62666667 | 0.69333333 |
| 8  | 0.5        | 2.47555556 | 0.54666667 | 0.69333333 |
| 16 | 0.5        | 2.29351111 | 0.50666667 | 0.65333333 |
| 8  | 0.5        | 2.55315556 | 0.54666667 | 0.70666667 |
| 16 | 0.5        | 2.61271111 | 0.584      | 0.73333333 |
| 8  | 0.5        | 2.57475556 | 0.61333333 | 0.73333333 |
| 16 |            | 1.51484444 | 0.26666667 | 0.46666667 |
| 8  |            | 2.33377778 | 0.47       | 0.65333333 |
| 16 |            | 2.40826667 | 0.49333333 | 0.70666667 |
| 8  |            | 2.59546667 | 0.62444444 | 0.72444444 |
| 16 | 1.70035556 |            | 0.36285714 | 0.48       |
| 8  | 1.73822222 |            | 0.37333333 | 0.46666667 |
| 16 | 2.48693333 |            | 0.53333333 | 0.70666667 |
| 8  | 2.57831111 |            | 0.58666667 | 0.70666667 |
| 16 | 2.76124444 |            | 0.62333333 | 0.77777778 |
| 8  | 2.50773333 |            | 0.57333333 | 0.68       |
| 16 | 2.77884444 |            | 0.56       | 0.76       |
| 8  | 2.47831111 |            | 0.52       | 0.70782609 |
| 16 | 2.01431111 |            | 0.45333333 | 0.57333333 |
| 8  | 2.35671111 |            | 0.52       | 0.69333333 |

|    |            |            |            |
|----|------------|------------|------------|
| 16 | 2.42231111 | 0.56       | 0.66666667 |
| 8  | 2.49528889 | 0.53333333 | 0.72       |
| 16 | 1.93315556 | 0.36       | 0.57333333 |
| 8  | 1.64791111 | 0.29142857 | 0.46666667 |
| 16 | 2.49048889 | 0.54666667 | 0.70666667 |
| 8  | 2.65333333 | 0.62222222 | 0.73333333 |
| 16 | 2.00044444 | 0.46666667 | 0.57333333 |
| 8  | 1.73866667 | 0.32       | 0.48       |
| 16 | 2.49288889 | 0.53333333 | 0.72       |
| 8  | 2.58195556 | 0.62666667 | 0.72       |
| 16 | 2.66266667 | 0.57333333 | 0.74666667 |
| 8  | 2.12044444 | 0.47407407 | 0.60733333 |
| 16 | 2.46302222 | 0.54666667 | 0.70666667 |
| 8  | 2.75324444 | 0.62666667 | 0.76       |
| 16 | 2.61084444 | 0.58666667 | 0.73333333 |
| 8  | 2.62408889 | 0.6        | 0.73333333 |
| 16 | 2.58533333 | 0.52666667 | 0.73333333 |
| 8  | 2.41537778 | 0.50666667 | 0.68       |
| 16 | 0          | 0          | 0          |
| 8  | 1.93857778 | 0.44333333 | 0.56       |
| 16 | 2.70826667 | 0.65333333 | 0.73333333 |
| 8  | 2.60088889 | 0.57333333 | 0.73333333 |
| 16 | 2.06657778 | 0.46       | 0.56       |
| 8  | 1.69742222 | 0.34933333 | 0.49333333 |
| 16 | 2.20933333 | 0.46666667 | 0.61333333 |
| 8  | 2.67591111 | 0.66666667 | 0.73333333 |
| 16 | 2.45333333 | 0.55384615 | 0.69333333 |
| 8  | 2.81022222 | 0.67833333 | 0.76       |
| 16 | 2.61431111 | 0.50666667 | 0.74666667 |
| 8  | 2.50168889 | 0.51555556 | 0.72       |
| 16 | 2.69635556 | 0.64333333 | 0.74666667 |
| 8  | 2.57137778 | 0.61333333 | 0.72       |
| 16 | 2.6568     | 0.56       | 0.76       |
| 8  | 2.60302222 | 0.61904762 | 0.74933333 |
| 16 | 1.82133333 | 0.4152381  | 0.52       |
| 8  | 2.75466667 | 0.65333333 | 0.74666667 |
| 16 | 2.38337778 | 0.50666667 | 0.68       |
| 8  | 2.54222222 | 0.53333333 | 0.73333333 |
| 16 | 1.89386667 | 0.42666667 | 0.54666667 |
| 8  | 1.70106667 | 0.28888889 | 0.50666667 |
| 16 | 2.52586667 | 0.57333333 | 0.70666667 |

|    |            |            |            |
|----|------------|------------|------------|
| 8  | 2.3296     | 0.49333333 | 0.66666667 |
| 16 | 2.46257778 | 0.46666667 | 0.72       |
| 8  | 2.40977778 | 0.50666667 | 0.68       |
| 16 | 2.46968889 | 0.56444444 | 0.69333333 |
| 8  | 2.43635556 | 0.53333333 | 0.67111111 |
| 16 | 2.29902222 | 0.46666667 | 0.66666667 |
| 8  | 2.66764444 | 0.58333333 | 0.73333333 |
| 16 | 2.5144     | 0.6        | 0.70666667 |
| 8  | 2.40533333 | 0.48       | 0.69333333 |
| 16 | 2.43004444 | 0.54666667 | 0.70666667 |
| 8  | 1.56968889 | 0.31833333 | 0.45333333 |
| 16 | 2.5584     | 0.59066667 | 0.72       |
| 8  | 2.59733333 | 0.57333333 | 0.74333333 |
| 16 | 2.14302222 | 0.47259259 | 0.58666667 |
| 8  | 2.02693333 | 0.44666667 | 0.57333333 |
| 16 | 2.57866667 | 0.54666667 | 0.70857143 |
| 8  | 2.38471111 | 0.57333333 | 0.68       |
| 16 | 2.38871111 | 0.49333333 | 0.69333333 |
| 8  | 2.46897778 | 0.53904762 | 0.69333333 |
| 16 | 2.50364444 | 0.53333333 | 0.71030303 |
| 8  | 2.33546667 | 0.53333333 | 0.65333333 |
| 16 | 2.58257778 | 0.6        | 0.73333333 |
| 8  | 2.74364444 | 0.62666667 | 0.76       |
| 16 | 2.56782222 | 0.56380952 | 0.73333333 |
| 8  | 2.73146667 | 0.6        | 0.76       |
| 16 | 1.94977778 | 0.44       | 0.5525     |
| 8  | 2.03911111 | 0.45333333 | 0.56       |
| 16 | 2.34311111 | 0.49333333 | 0.64       |
| 8  | 2.69795556 | 0.62666667 | 0.72       |
| 16 | 1.8912     | 0.41481481 | 0.52177778 |
| 8  | 2.23475556 | 0.50666667 | 0.62877193 |
| 16 | 2.69164444 | 0.61333333 | 0.73333333 |
| 8  | 2.63448889 | 0.58666667 | 0.74666667 |
| 16 | 2.66631111 | 0.58666667 | 0.76       |
| 8  | 2.71004444 | 0.6        | 0.74666667 |
| 16 | 2.54328889 | 0.53333333 | 0.70666667 |
| 8  | 2.68897778 | 0.61666667 | 0.74666667 |
| 16 | 2.70026667 | 0.615      | 0.74666667 |
| 8  | 2.16488889 | 0.45490196 | 0.61       |
| 16 | 2.68666667 | 0.61333333 | 0.73333333 |
| 8  | 2.30906667 | 0.48       | 0.66666667 |

|    |            |            |            |
|----|------------|------------|------------|
| 16 | 1.95253333 | 0.4        | 0.56       |
| 8  | 1.94764444 | 0.45333333 | 0.52       |
| 16 | 2.6712     | 0.61866667 | 0.74666667 |
| 8  | 2.55031111 | 0.54666667 | 0.70666667 |
| 16 | 1.91297778 | 0.43809524 | 0.54133333 |
| 8  | 1.65155556 | 0.34666667 | 0.44       |
| 16 | 2.42835556 | 0.6        | 0.65333333 |
| 8  | 2.43155556 | 0.50666667 | 0.69333333 |
| 16 | 2.19306667 | 0.448      | 0.61333333 |
| 8  | 2.6184     | 0.61333333 | 0.73333333 |
| 16 | 2.38791111 | 0.50666667 | 0.68       |
| 8  | 2.39662222 | 0.56444444 | 0.68       |
| 16 | 2.44328889 | 0.54666667 | 0.68848485 |
| 8  | 2.5816     | 0.56666667 | 0.70666667 |
| 16 | 2.34062222 | 0.52       | 0.68       |
| 8  | 2.5584     | 0.58909091 | 0.70666667 |
| 16 | 2.05626667 | 0.48       | 0.54333333 |
| 8  | 2.16871111 | 0.45333333 | 0.64       |
| 16 | 2.46888889 | 0.5769697  | 0.66666667 |
| 8  | 2.6432     | 0.57666667 | 0.74666667 |
| 16 | 2.50897778 | 0.58666667 | 0.70666667 |
| 8  | 1.87004444 | 0.36444444 | 0.54333333 |
| 16 | 2.03937778 | 0.44777778 | 0.55       |
| 8  | 2.61084444 | 0.55555556 | 0.73333333 |
| 16 | 2.42844444 | 0.56       | 0.6647619  |
| 8  | 2.34497778 | 0.52       | 0.69333333 |
| 16 | 2.67022222 | 0.50666667 | 0.78074074 |
| 8  | 2.44791111 | 0.54666667 | 0.69333333 |
| 16 | 2.3696     | 0.46666667 | 0.70666667 |
| 8  | 2.58       | 0.6        | 0.70666667 |
| 16 | 2.63111111 | 0.58571429 | 0.74666667 |
| 8  | 2.4704     | 0.57333333 | 0.68       |
| 16 | 1.99937778 | 0.48       | 0.56       |
| 8  | 2.15848889 | 0.48833333 | 0.6        |
| 16 | 2.51982222 | 0.54666667 | 0.70666667 |
| 8  | 2.7072     | 0.61333333 | 0.73333333 |
| 16 | 2.47128889 | 0.52166667 | 0.70666667 |
| 8  | 2.47946667 | 0.57333333 | 0.68       |
| 16 | 2.1064     | 0.48       | 0.57333333 |
| 8  | 2.51404444 | 0.54       | 0.70666667 |
| 16 | 1.95333333 | 0.43238095 | 0.56666667 |

|    |            |            |            |
|----|------------|------------|------------|
| 8  | 2.53226667 | 0.53333333 | 0.70666667 |
| 16 | 2.54133333 | 0.6        | 0.70666667 |
| 8  | 2.71048889 | 0.57333333 | 0.76       |
| 16 | 2.60124444 | 0.57333333 | 0.73333333 |
| 8  | 2.39528889 | 0.51076923 | 0.67666667 |
| 16 | 2.41697778 | 0.57333333 | 0.68484848 |
| 8  | 2.49146667 | 0.49333333 | 0.70666667 |
| 16 | 1.86577778 | 0.41333333 | 0.51333333 |
| 8  | 1.99582222 | 0.4        | 0.56       |
| 16 | 2.64195556 | 0.6        | 0.73333333 |
| 8  | 2.7152     | 0.61333333 | 0.73333333 |
| 16 | 1.93573333 | 0.39333333 | 0.56       |
| 8  | 1.71431111 | 0.34333333 | 0.48848485 |
| 16 | 2.46871111 | 0.50666667 | 0.73333333 |
| 8  | 2.75671111 | 0.68       | 0.77333333 |
| 16 | 2.34844444 | 0.53333333 | 0.66666667 |
| 8  | 2.51031111 | 0.50666667 | 0.72       |
| 16 | 2.33502222 | 0.50666667 | 0.66285714 |
| 8  | 2.48764444 | 0.53166667 | 0.72       |
| 16 | 2.50533333 | 0.56       | 0.70666667 |
| 8  | 2.37422222 | 0.53142857 | 0.69333333 |
| 16 | 2.55964444 | 0.55066667 | 0.72       |
| 8  | 2.64097778 | 0.58333333 | 0.73333333 |
| 16 | 2.20853333 | 0.46666667 | 0.62666667 |
| 8  | 2.12586667 | 0.45333333 | 0.6        |
| 16 | 2.50915556 | 0.59333333 | 0.69333333 |
| 8  | 2.51048889 | 0.59466667 | 0.68       |
| 16 | 2.09475556 | 0.45333333 | 0.57333333 |
| 8  | 2.17146667 | 0.48       | 0.61333333 |
| 16 | 2.4056     | 0.498      | 0.68       |
| 8  | 2.66231111 | 0.60533333 | 0.72       |
| 16 | 2.38924444 | 0.55666667 | 0.68       |
| 8  | 2.59297778 | 0.52       | 0.72       |
| 16 | 2.67333333 | 0.60266667 | 0.73333333 |
| 8  | 2.5672     | 0.59833333 | 0.69333333 |
| 16 | 2.73706667 | 0.655      | 0.72666667 |
| 8  | 2.65955556 | 0.59666667 | 0.74666667 |
| 16 | 2.75048889 | 0.608      | 0.77333333 |
| 8  | 2.5288     | 0.55833333 | 0.70666667 |
| 16 | 1.90151111 | 0.39384615 | 0.56       |
| 8  | 1.91644444 | 0.38666667 | 0.53333333 |

|    |            |            |            |
|----|------------|------------|------------|
| 16 | 2.47795556 | 0.54666667 | 0.70666667 |
| 8  | 2.5592     | 0.56       | 0.70666667 |
| 16 | 1.87271111 | 0.408      | 0.53333333 |
| 8  | 2.03191111 | 0.465      | 0.57333333 |
| 16 | 2.57644444 | 0.55111111 | 0.76       |
| 8  | 2.57128889 | 0.56       | 0.70666667 |
| 16 | 2.42177778 | 0.56       | 0.65904762 |
| 8  | 2.27066667 | 0.53333333 | 0.622      |
| 16 | 2.34853333 | 0.56       | 0.65333333 |
| 8  | 2.62897778 | 0.61666667 | 0.73333333 |
| 16 | 2.31662222 | 0.52       | 0.66666667 |
| 8  | 2.7328     | 0.6        | 0.76       |
| 16 | 2.59111111 | 0.54962963 | 0.73333333 |
| 8  | 2.23448889 | 0.50666667 | 0.64       |
| 16 | 2.16924444 | 0.50666667 | 0.58666667 |
| 8  | 2.39502222 | 0.52       | 0.67777778 |
| 16 | 2.47031111 | 0.52       | 0.68       |
| 8  | 2.58337778 | 0.59333333 | 0.71333333 |
| 16 | 1.78391111 | 0.38857143 | 0.49333333 |
| 8  | 2.60408889 | 0.57333333 | 0.70833333 |
| 16 | 2.62453333 | 0.64666667 | 0.70666667 |
| 8  | 2.67217778 | 0.58666667 | 0.74666667 |
| 16 | 2.67573333 | 0.64       | 0.74666667 |
| 8  | 2.73324444 | 0.65333333 | 0.74666667 |
| 16 | 2.37786667 | 0.49333333 | 0.68       |
| 8  | 2.6248     | 0.62666667 | 0.74666667 |
| 16 | 2.71075556 | 0.55555556 | 0.77066667 |
| 8  | 2.7312     | 0.64952381 | 0.74666667 |
| 16 | 2.57511111 | 0.50666667 | 0.69333333 |
| 8  | 2.54942222 | 0.53333333 | 0.73333333 |
| 16 | 2.14133333 | 0.52       | 0.6        |
| 8  | 1.88222222 | 0.4        | 0.53333333 |
| 16 | 2.60391111 | 0.56333333 | 0.73333333 |
| 8  | 2.77662222 | 0.6        | 0.78666667 |
| 16 | 2.30551111 | 0.52       | 0.64       |
| 8  | 1.87475556 | 0.37733333 | 0.52       |
| 16 | 2.64355556 | 0.58666667 | 0.73333333 |
| 8  | 2.45626667 | 0.54933333 | 0.70666667 |
| 16 | 2.56168889 | 0.51809524 | 0.73333333 |
| 8  | 2.25875556 | 0.44888889 | 0.68       |
| 16 | 2.31324444 | 0.445      | 0.66666667 |



|    |            |            |            |
|----|------------|------------|------------|
| 8  | 2.26142222 | 0.54666667 | 0.65333333 |
| 16 | 2.35635556 | 0.46666667 | 0.69333333 |
| 8  | 2.26035556 | 0.48       | 0.64       |
| 16 | 2.15768889 | 0.46666667 | 0.61333333 |
| 8  | 2.38755556 | 0.54666667 | 0.65333333 |
| 16 | 2.10106667 | 0.43111111 | 0.6        |
| 8  | 2.25955556 | 0.45833333 | 0.62666667 |
| 16 | 2.87582222 | 0.68333333 | 0.78666667 |
| 8  | 2.63955556 | 0.60888889 | 0.72       |
| 16 | 1.86675556 | 0.3875     | 0.5        |
| 8  | 2.33635556 | 0.53333333 | 0.65333333 |
| 16 | 2.62675556 | 0.56       | 0.72222222 |
| 8  | 2.42231111 | 0.52606061 | 0.66666667 |
| 16 | 2.66471111 | 0.59246377 | 0.72       |
| 8  | 2.58764444 | 0.54666667 | 0.7047619  |
| 16 | 2.75422222 | 0.61333333 | 0.77333333 |
| 8  | 2.40897778 | 0.51407407 | 0.68       |
| 16 | 2.64142222 | 0.65333333 | 0.73333333 |
| 8  | 2.62408889 | 0.62666667 | 0.70666667 |
| 16 | 2.37751111 | 0.55111111 | 0.65333333 |
| 8  | 2.45324444 | 0.50666667 | 0.69333333 |
